1  
2  
3  
4  
5  
6  
7  
8  
9  
10  
11  
12  
13  
14  
15  
16  
17  
18  
19  
20  
21  
22  
23  
24  
25  
26  
27  
28  
29  
30  
31  
32

## **Within-host *Mycobacterium tuberculosis* evolution: a population genetics perspective**

Ana Y. Morales-Arce\*, Rebecca B. Harris\*, Anne C. Stone\*,<sup>†</sup> & Jeffrey D. Jensen\*,<sup>‡</sup>

\*Center for Evolution and Medicine, Arizona State University, Tempe, Arizona, USA

<sup>†</sup>School of Human Evolution and Social Change, Arizona State University, Tempe, Arizona, USA

<sup>‡</sup>School of Life Sciences, Arizona State University, Tempe, Arizona, USA

### **ABSTRACT**

The within-host evolutionary dynamics of TB remain unclear, and underlying biological characteristics render standard population genetic approaches based upon the Wright-Fisher model largely inappropriate. In addition, the compact genome combined with an absence of recombination is expected to result in strong purifying selection effects. Thus, it is imperative to establish a biologically-relevant evolutionary framework incorporating these factors in order to enable an accurate study of this important human pathogen. Further, such a model is critical for inferring fundamental evolutionary parameters related to patient treatment, including mutation rates and the severity of infection bottlenecks. We here implement such a model and infer the underlying evolutionary parameters governing within-patient evolutionary dynamics. Results demonstrate that the progeny skew associated with the clonal nature of TB severely reduces genetic diversity and that the neglect of this parameter in previous studies has led to significant mis-inference of mutation rates. As such, our results suggest an underlying *de novo* mutation rate that is considerably faster than previously inferred, and a progeny distribution differing significantly from Wright-Fisher assumptions. This inference largely reconciles the seemingly contradictory observations of both rapid drug-resistance evolution but extremely low levels of genetic variation in both resistant and non-resistant populations.

33

## INTRODUCTION

34 Tuberculosis (TB) is a public health threat worldwide (WHO, 2018). Despite clear  
35 motivation for study, the observed within- and between-host evolutionary dynamics of  
36 *Mycobacterium tuberculosis* (*M.TB*) are not well understood, and results to date represent  
37 something of a paradox. On the one hand, drug resistance evolves rapidly (Fonseca *et al.* 2015;  
38 Eldholm *et al.* 2015); on the other, the genomic characteristics of *M.TB* do not appear conducive  
39 for such rapid adaptation, with inferred mutation rates being amongst the slowest of any human  
40 pathogen (Rocha *et al.* 2006; Ford *et al.* 2011; Ford *et al.* 2013; Colangeli *et al.* 2014; Payne *et*  
41 *al.* 2019; Menardo *et al.* 2019) and remarkably little genetic variation observed within or  
42 between hosts. Furthermore, purifying selection has been argued to play both a dominant as well  
43 as a weak role in shaping patterns of variation (Hershberg *et al.* 2008; Pepperell *et al.* 2013), and  
44 demographic estimates suggest a population history of TB that either matches or is uncorrelated  
45 with that of its human host (Comas *et al.* 2013; Bos *et al.* 2014; Brites *et al.* 2015; Eldholm *et al.*  
46 2016).

47

48 To obtain a more robust understanding of TB evolutionary dynamics, it is essential to  
49 first appreciate that between-population observations are simply an aggregation of within-  
50 population processes. As such, studying the population genetics of within-patient data is critical  
51 to understanding the genetic differences observed between patients as well as their treatment  
52 outcomes. Fortunately, recent advances in sequencing technologies have allowed for more  
53 abundant and higher quality within-patient data. These published datasets have revealed a few  
54 common features of *M.TB*, including low-levels of genome-wide variation. For instance, Trauner  
55 *et al.* (2017) deep-sequenced twelve patients across four-time points and observed fewer than 50  
56 polymorphic sites per patient genome-wide. In addition, the observed site frequency spectrum  
57 (SFS) is generally characterized by an abundance of rare variants (*i.e.*, it is strongly left-skewed).  
58 These patterns have partly led to the suggestion that purifying selection effects may be wide-  
59 spread in the *M.TB* genome (Brown *et al.* 2016; Phelan *et al.* 2016; Mortimer *et al.* 2018).

60

61 Additional evolutionary factors likely contribute to these genomic patterns as well. For  
62 example, population bottlenecks may reduce genetic variation and alter the shape of the SFS  
63 (see review Thornton *et al.* 2007). Previous *M.TB* studies have investigated these effects

64 separately in both the deep-time view of the population bottleneck and subsequent growth  
65 experienced by the host human population (Hershberg *et al.* 2008, Liu *et al.* 2018), as well as the  
66 shallow-time view of the population bottleneck and subsequent growth characterizing each novel  
67 transmission event and treatment (*e.g.*, Trauner *et al.* 2017). Additionally, in fitting the left-  
68 skewed SFS, Pepperell *et al.* (2013) found that such a demographic history combined with a mix  
69 of both deleterious and neutrally-evolving sites produced the nearest fit to the observed SFS.  
70 Finally, given the lack of recombination in *M.TB*, related linkage effects (*i.e.*, background  
71 selection (Charlesworth *et al.* 1993)) have similarly been discussed within these contexts  
72 (Pepperell *et al.* 2010; Copin *et al.* 2016).

73  
74 While these studies have provided many important insights, there remains a relatively  
75 unexplored, though potentially highly significant, effect: clonality. Indeed, clonality and the  
76 related progeny distribution represents an important violation of commonly used evolutionary  
77 inference approaches based upon the Wright-Fisher (WF) model and the related Kingman  
78 coalescent (Eldon *et al.* 2006; Dos Vultos *et al.* 2008; Huillet *et al.* 2011; Lapierre *et al.* 2016).  
79 Specifically, progeny distributions under the WF model are Poisson distributed with a mean and  
80 variance of 1. Therefore, when an individual produces many offspring, far in excess of simple  
81 replacement in the next generation, the assumption that only two lineages coalesce at a time is  
82 violated, resulting in multiple-merger coalescent (MMC) events (see reviews of Tellier &  
83 Lemaire 2014; Irwin *et al.* 2016).

84  
85 While perhaps abstract at first blush, this violation has very important implications for the  
86 study of sequence variation and diversity. Namely, as *M.TB* has been found to exhibit strong  
87 progeny skew owing to obligate clonal reproduction (Baker *et al.* 2004; Dos Vultos *et al.* 2008),  
88 the null model against which the above studies are comparing becomes incorrect. For example,  
89 under a multiple-merger model, the effective population size ( $N_e$ ) no longer scales linearly with  
90 census size ( $N$ ) as it does under the Kingman coalescent (Huillet *et al.* 2011). As a result, genetic  
91 diversity is a nonlinear function of the underlying population size - a result of interest given the  
92 strongly constrained and similar levels of variation observed across TB patients, regardless of  
93 infection time or resistance status. Similarly, under these progeny-skew models, the SFS is  
94 skewed towards an excess of low-frequency variants, generating a negative Tajima's  $D$  even

95 under equilibrium neutrality (Eldon *et al.* 2006; Birkner *et al.* 2013; Blath *et al.* 2016) – which  
96 appears of relevance to *M.TB* populations given the pervasively left-skewed SFS observed both  
97 within and between TB patients. Finally, the fixation probability of beneficial mutations under  
98 progeny skew may become much larger than under the WF model, owing to the increased  
99 probability of rapidly escaping stochastic loss (Der *et al.* 2011). This is fundamental to  
100 understanding the rapidly and independently evolving drug-resistance mutations in global TB  
101 populations - a result seemingly at odds with the previously inferred mutation rates (Sherman *et*  
102 *al.* 2011; Colangeli *et al.* 2014; Duchêne *et al.* 2016). In sum, the general theoretical expectations  
103 owing to progeny skew alone appear to qualitatively match empirical observations from *M.TB*;  
104 observations which, to date, have been attributed to alternate processes.

105  
106       Recent progress has been made in utilizing these models to disentangle and even co-  
107 estimate patterns of demography, progeny skew, and selection. While there exist a variety of  
108 potential MMC models (see review of Tellier & Lemaire 2014), the so-called  $\Psi$ -coalescent has  
109 been a major focus of this literature given the straight-forward biological interpretation. Namely,  
110 the parameter  $\Psi$  represents the proportion of the next generation arising from a single parent  
111 (*e.g.*,  $\Psi = 0.05$  implies that one individual contributes offspring that comprise 5% of the next  
112 generation). In addition to which, recent experimental measures from viral populations are  
113 offering real-time insights in to such progeny distributions (Vahey and Fletcher 2019). Three  
114 results are of particular importance here. First, Eldon *et al.* (2015) demonstrated that population  
115 growth may be distinguished from multiple-merger coalescent events owing to progeny-skew,  
116 given differing expectations in the SFS. Second, Matuszewski *et al.* (2018) derived analytical  
117 expectations for the SFS under a multiple merger coalescent model with changing population  
118 size and further demonstrated that these parameters can indeed be accurately inferred jointly  
119 within a likelihood framework. Finally, building upon the two above results as well as the  
120 approximate Bayesian statistical framework developed by Foll *et al.* (2014, 2015), Sackman *et*  
121 *al.* (2019) recently extended these results and demonstrated an ability to co-estimate progeny  
122 skew, effective population size, as well as per-site selection coefficients from time-sampled  
123 polymorphism data.

124



156 in earlier estimates as these mutations are unlikely to be sampled as segregating variation or as  
157 fixed differences. However, as these mutations are important for shaping diversity via both  
158 purifying selection and background selection effects, and as our interest is in understanding the  
159 total rate at which all *de novo* mutations are input into the population, we considered the total  
160 rather than the neutral mutation rate. In order to infer this parameter within the context of an  
161 appropriate progeny-skew model,  $\mu$  was drawn from a prior uniform distribution between  $1e-9$   
162 and  $9e-6$  per site per generation.

163  
164 Following an initial burn-in period of  $10N$  generations, we considered a three-stage  
165 demographic model characterizing a single patient infection: moving forward in time, we  
166 describe 1) a neutral equilibrium population of size  $N$ , 2) an initial infection bottleneck leading to  
167 an instantaneous population reduction to size  $N/2$ , and 3) a subsequent population size recovery to  
168 size  $N$ . In stage 1, we modeled a population of size  $N = 1,000$ . In order to quantify the effects of  
169 underlying assumptions pertaining to population size, additional simulations and inference were  
170 performed at  $N = 25,000$ . During stage 2, the severity of the population bottleneck ( $\beta$ ) was  
171 sampled from  $\sim U[0.001, 0.1]$ , where  $N/2 = N*\beta$  - as the distribution of infection size in humans  
172 is unknown. However, it has been reported that in cattle TB (*M. bovis*) infection can be  
173 established by a single cell forming unit (Dean *et al.* 2005). During stage 2, the degree of  
174 progeny skew (or  $\Psi$ ) was sampled from a prior distribution of  $\sim U[0, 0.2]$ . A value of 0  
175 corresponds to the standard WF model. Progeny skew was simulated following the procedure of  
176 Sackman *et al.* 2019. In brief, one individual is chosen from the primary population A and  
177 founds a separate subpopulation B, the single generation unidirectional migration rate from B to  
178 A is set to  $\Psi$ , and the chosen individual thus contributes  $N\Psi$  offspring to the following generation  
179 of A. A series of mate choice callbacks in SLiM force the migration rate to be exact rather than  
180 stochastic (see Supplementary Materials of Sackman *et al.* 2019). Subpopulation B is removed,  
181 the next generation begins, and a new individual is randomly sampled for the following  
182 generation. As such, each generation is a combination of  $N(1-\Psi)$  replacement events and a single  
183 sweepstakes event of magnitude  $N\Psi$ . To emulate patient sampling at the onset of symptoms  
184 (approximately three months minimum (Behr *et al.* 2018)), we allowed stage 2 to run for 90  
185 generations, assuming a generation time of 24 hours (Cole *et al.* 1998), and stage 3 to run for 910

186 generations before outputting genome alignments in ms format. Thus, the total generation time  
187 of our model was  $11N$ .

188  
189 Drawing from these prior distributions, 10,000 points (*i.e.*, parameter combinations) were  
190 sampled. For each parameter combination, we conducted 1,000 replicates in order to characterize  
191 both the mean and variance. Summary statistics were calculated in the R package PopGenome  
192 version 2.6.1 (Pfeifer *et al.* 2014).

193

#### 194 **Data analysis and joint posterior estimates**

195 For comparison to patient data, we examined the distribution and mean of segregating  
196 sites in samples published by Trauner *et al.* (2017).

197 (<https://zenodo.org/record/322377#.XO2CAy2ZNBw>). A subset of 1,000 populations was  
198 simulated under the conditions described above. Given that patient data are subject to stringent  
199 filtering criteria, removing SNPs under a particular frequency cut-off, it was necessary to filter  
200 the simulated data to allow fair comparison. Thus, 100 genomes were sampled per each  
201 simulated population, and variants  $< 2\%$  frequency were filtered out before the calculation of  
202 summary statistics (Table S1). Afterward, only genomes with  $\geq 2$  segregating sites were  
203 considered for further analyses, and the fraction of “invariable genomes” was noted for  
204 comparison to patient samples (Figure 2 and Table S1).

205

## 206 **RESULTS & DISCUSSION**

### 207 **Considering levels of variation**

208 We here report the first joint consideration of mutation rate, purifying selection, infection  
209 history, and progeny-skew in *M.TB* populations. A correlation of summary statistics (Figure 1)  
210 demonstrates that while mutation rate ( $\mu$ ) increases the number of segregating sites as expected,  
211 progeny skew ( $\Psi$ ) acts to reduce variation. Furthermore, as the  $\Psi$ -parameter is of relevance every  
212 generation (*i.e.*, every reproduction event), the impact of this previously unconsidered progeny  
213 skew on levels of variation is in fact much stronger than the single bottleneck event associated  
214 with infection. Considering the full distribution of sampled  $\mu$  values (Figure S1), it is apparent  
215 that  $\Psi$  drastically reduces the average proportion of segregating sites genome-wide even for fast

216 mutation rates, and that the probability of producing genomes devoid of any variation will  
 217 naturally increase as  $\mu$  decreases.  
 218

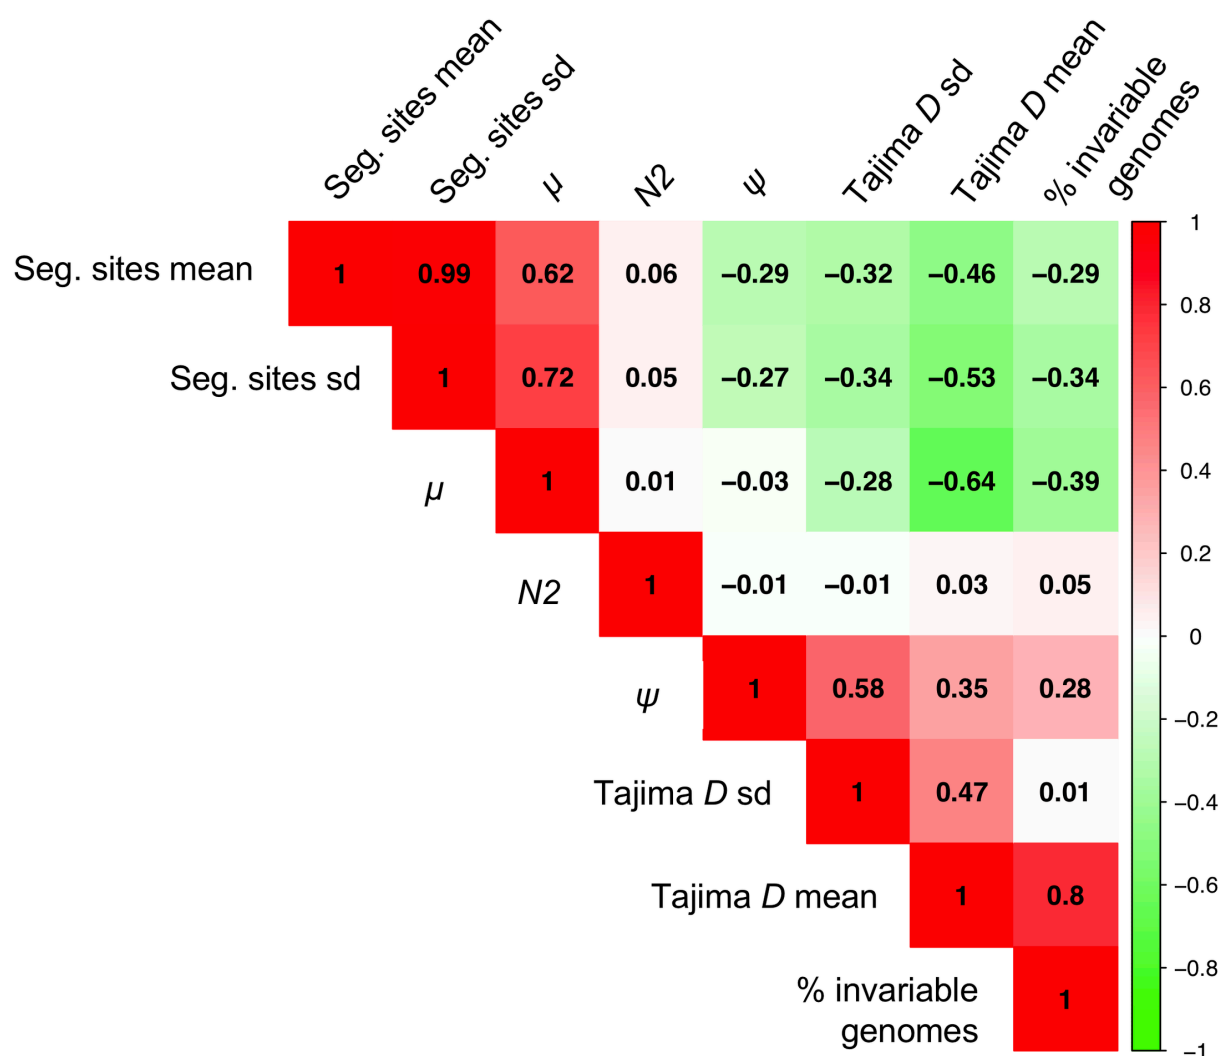

219  
 220  
 221 **Figure 1. Correlation heatmap of parameters and summary statistics.** Correlations are given  
 222 between the parameters of interest (mutation rate ( $\mu$ ), progeny skew ( $\psi$ ), and bottleneck severity  
 223 ( $N2$ )), and summary statistics (the mean and variance of the level of variation as measured by the  
 224 number of segregating sites, and the mean and variance of the distribution of variation as  
 225 measured by Tajima's  $D$ ). As shown,  $N2$  values do not correlate with any of the summary  
 226 statistics, as the effect of the single generation bottleneck is swamped by the per-generation  
 227 reproductive skew. Further, as expected, values of  $\mu$  positively correlate with the number of  
 228 segregating sites, while  $\psi$  acts to reduce variation and is thus negatively correlated. Finally,  
 229 while  $\mu$  would not be expected to strongly correlate with the shape of the SFS (here summarized  
 230 by Tajima's  $D$ ) for neutral mutations, it does so here given that we explicitly account for the  
 231 input of deleterious mutations (see Methods).  
 232



233 In order to consider a range of  $\mu$  consistent with observed data - once pervasive purifying  
 234 selection and progeny skew have been taken in to account - two examples of patient data  
 235 collected by Trauner *et al.* (2017) representing low (20 segregating sites genome-wide) and high  
 236 (50 segregating sites genome-wide) variation samples were plotted and compared to the  
 237 simulated data. In order to compare simulated data with patient data, the same filtering steps  
 238 must be applied. In this case, SNPs under 2% frequency were filtered in the empirical data, and  
 239 thus, the simulated data were similarly filtered in order to be comparable (Figure 2).

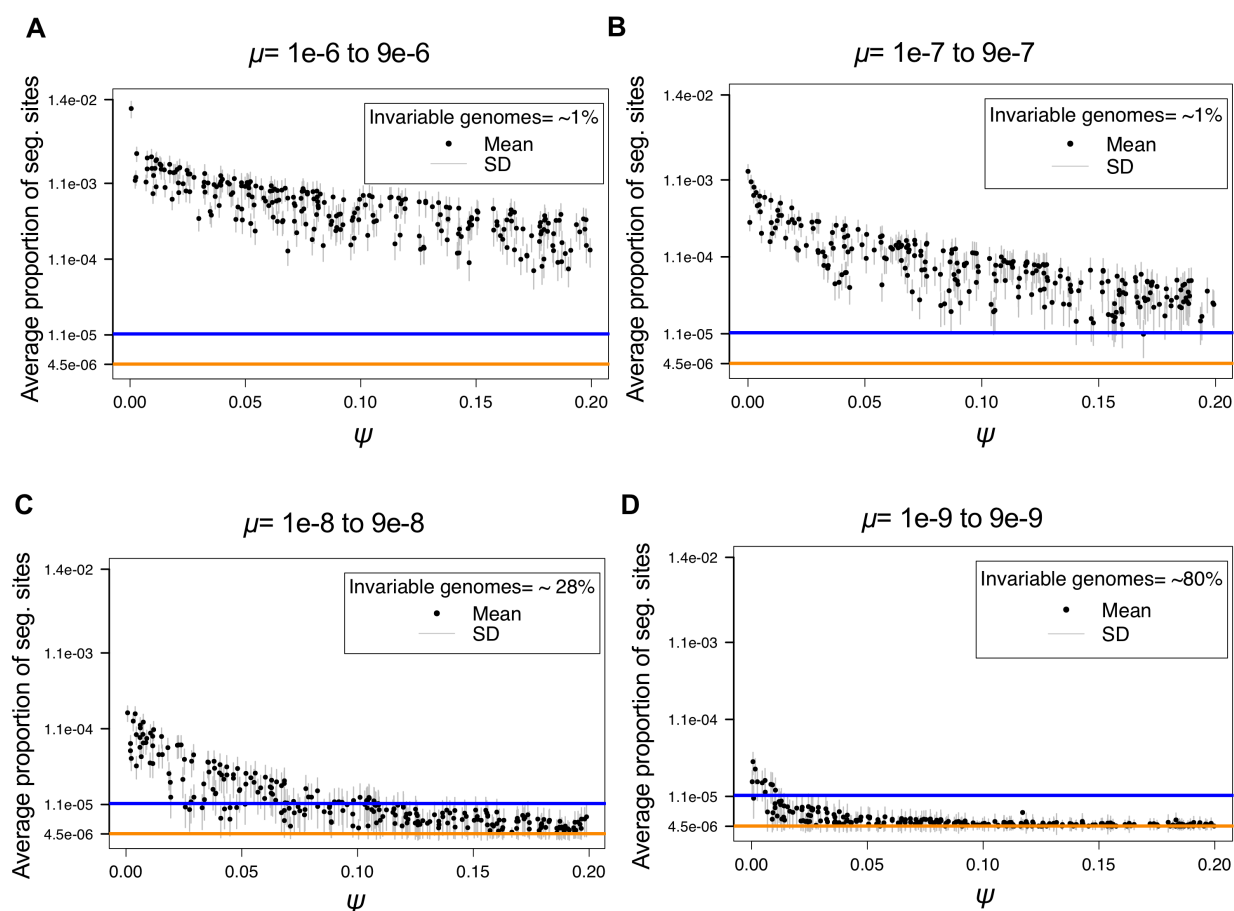

240  
 241 **Figure 2. Log scale distribution of segregating sites above 2% frequency, as a function of**  
 242 **mutation rate ( $\mu$ ) and progeny skew ( $\Psi$ ).** For each parameter combination (1,000 in total) of  $\mu$   
 243 and  $\Psi$  drawn from the prior distributions, 1,000 replicates were simulated, with the mean given  
 244 by the black dot and the standard deviation given by the gray bars. Each panel corresponds to a  
 245 different order of magnitude of mutation rate range: (A)  $1e-6$  to  $9e-6$ , (B)  $1e-7$  to  $9e-7$ , (C)  $1e-8$   
 246 to  $9e-8$ , and (D)  $1e-9$  to  $9e-9$ . The colored lines correspond to two examples of the proportion of  
 247 segregating sites observed genome-wide in empirical patient data: 20 segregating sites as a mean  
 248 (orange), and 50 segregating sites from patient\_10 (blue) (Trauner *et al.* 2017). As shown, the  
 249 range of segregating sites for the fast mutation rates (panels A and B), result in expectations  
 250 much larger than that observed in patient data, regardless of  $\Psi$ . Conversely, the slowest mutation  
 251 rate (panel D), result in too little variation, except under WF conditions (*i.e.*,  $\Psi$  near 0) which are

252 known to be violated given clonality. Thus, rates on the order of  $1e-8$  to  $9e-8$  (panel C) appear to  
253 well explain the range of variation observed in patient data, and further imply values of  $\Psi$   
254 ranging roughly from 0.05 to 0.1, consistent with values previously estimated for within-host  
255 virus data (Sackman *et al.* 2019).

256  
257 As shown, fast mutation rates ( $\mu$  on the order of  $1e-6$  and  $1e-7$ ) routinely produce  
258 expected numbers of segregating sites far above that observed in patients, regardless of other  
259 parameter values, while slow mutation rates ( $\mu$  on the order of  $1e-9$ ) generally result in too little  
260 variation to match observation. This result is of interest as *M.TB* mutation rates are generally  
261 believed to be exceedingly slow (Sherman *et al.* 2011) - though importantly, this inference has  
262 largely neglected the important contribution of these additional evolutionary processes. Thus,  
263 once accounting for the diversity-reducing effects inherent to clonality, as well as the extent of  
264 purifying selection effects inherent to a compact, non-recombining genome, it is evident that the  
265 *de novo* mutation rate is likely faster than previously believed, with mutation rates on the order  
266  $1e-8$  well matching the range of observed data (Figure 2). In addition, in order to consider the  
267 impact of underlying assumptions pertaining to population size, simulations were re-performed  
268 with a 25x larger population size. As shown in Figure S2, owing to these diversity reducing  
269 effects, mutations rates on the order of  $1e-8$  remain the best fit to observed levels of variation,  
270 with slower mutation rates still producing too little variation and too many invariable genomes to  
271 be consistent with patient data.

272

### 273 **Considering distributions of variation**

274 For the general range of  $\mu$  identified above, the number of genome-wide segregating sites  
275 in simulated population data ranged from a minimum average of 2.1 to a maximum average of  
276 78.7 SNPs (Table S1), depending on the combination of  $\mu$  and  $\Psi$  drawn from the priors.  
277 Specifically, higher values of  $\mu$  may be off-set by higher values of  $\Psi$ , resulting in a similar  
278 number of segregating sites for multiple parameter combinations. For example, for the patient  
279 sample containing 10 SNPs, simulation results demonstrate that  $\mu = 8.13e-08$  and a  $\Psi = 0.06$   
280 would produce an average of  $10.15 \pm 4.64$  SNPs, potentially suggesting a good fit to the data.  
281 However,  $\mu = 3.1e-08$  and a  $\Psi = 0.02$  can also generate similar results, yielding  $10.40 \pm 4.45$   
282 SNPs. More generally, this ridge in the posterior distributions (Figure 3A) between these two

283 parameters suggests that they will be difficult to estimate independently if only levels of  
284 variation are used.

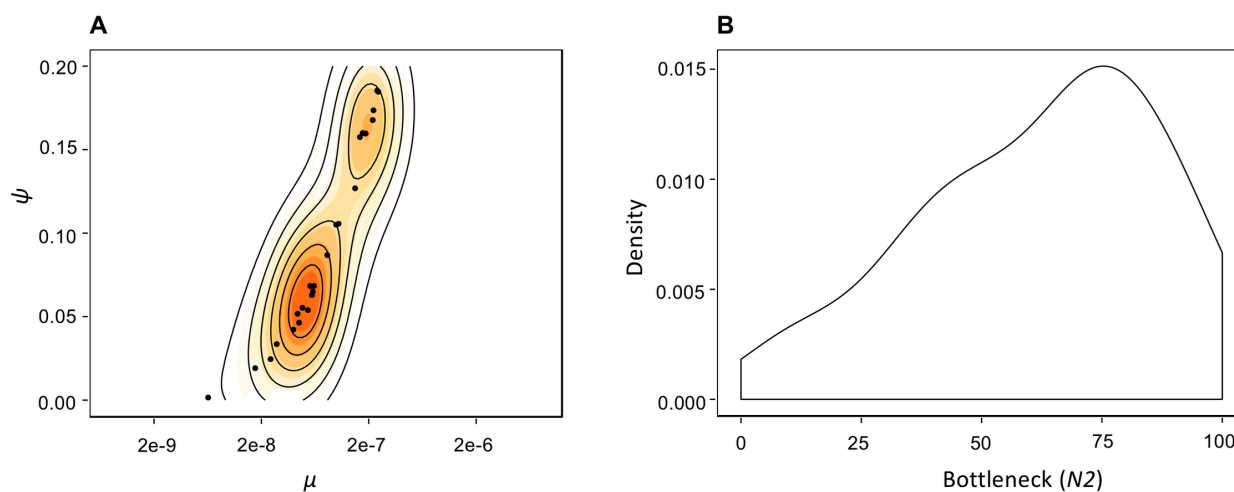

285  
286 **Figure 3. Posterior parameter estimates pertaining to patient data.** (A) Joint posterior  
287 distribution for the parameters  $\mu$  and  $\Psi$ . Solid contour lines specify the highest posterior density  
288 intervals. Owing to the diversity-increasing effect of  $\mu$  and diversity-decreasing effect of  $\Psi$ , there  
289 exists a ridge in the joint posterior. Regardless, owing to differing expectations in the SFS along  
290 this ridge, inference suggests  $\mu$  values within the  $1 \text{e-}8$  range in combination with  $\Psi < 0.10$ . (B)  
291 Posterior density for the severity of the infection bottleneck ( $N_2$ ). The X-axis gives the number  
292 of genomes at the time of infection reduced from 1,000. While the posterior distribution is non-  
293 uniform, the observation that all tested values remain consistent with patient data strongly  
294 suggests that there is not sufficient information in the data to estimate this third parameter (*i.e.*,  
295 size of the bottleneck, in addition to  $\mu$  and  $\Psi$ ).

296  
297 Thus, while comparisons with general levels of variation are useful for identifying a  
298 range as in the above section, more information is needed to parse values further. Importantly,  
299 previous theoretical results (Eldon & Wakeley 2016; Matuszewski *et al.* 2018) have well  
300 described the effect of  $\Psi$  on the observed distribution of genetic variation (*i.e.*, SFS). To utilize  
301 this information, a general summary of the SFS, Tajima's  $D$  (1989), was calculated on the  
302 filtered simulated data. As shown (Figure S3), the shape of the SFS, and thus the value of the  $D$ -  
303 statistic, is related to the value of  $\Psi$ . As the degree of progeny skew initially increases,  $D$   
304 becomes increasingly negative, as previously described. However, as progeny distributions  
305 become highly skewed, levels of variation are sharply reduced, resulting in an apparent increase  
306 in  $D$  values (Figure S3). Increasing  $D$  values could also be a result of the underlying filtering  
307 criteria, as after filtering simulations to match real data with segregating sites  $> 2\%$ ,  $D$  values

308 increased proportionally (Figure S4). However, Tajima's  $D$  is consistently negative in all  
309 mutation ranges, even after filtering.

310

### 311 **Parameter inference from patient samples**

312 Thus, we next considered these results in light of published patient data. Recent  
313 publications have suggested that NGS technologies could facilitate personalized treatment in TB  
314 patients, allowing for improved outcomes (Copin *et al.* 2016; Cancino-Muñoz *et al.* 2019). To  
315 utilize such data, however, it is vital to understand the evolutionary dynamics shaping within-  
316 host *M.TB* diversity. As an illustrative example, we have re-examined the number of segregating  
317 sites in patient samples and estimated a mean  $\sim 10$  segregating sites per sample (Trauner *et al.*  
318 2017) (Figure S5). Further, using the results and expectations obtained above regarding the level  
319 and distribution of variation, the patient data appear best fit by simulated populations with  $\mu$   
320 values ranging from  $7.3e-9$  to  $3.8e-7$ , with the strongest posterior density at  $\mu \sim 6e-8$  and  $\Psi \sim$   
321  $0.06$  (Figure 3A). Notably, faster  $\mu$  values could produce similar results, but only if  $\Psi$   
322 proportions are in excess of  $0.15$  (Figure 3A).

323

324 In addition, owing to the strong per-generation reductions associated with progeny skew,  
325 there remains no signal in the data to estimate the severity of the infection bottleneck accurately  
326 (Figure 3B). Specifically, while there is an increase in density towards stronger bottleneck  
327 values, the posterior distribution is not notably distinct from the prior distribution  $\sim U[0.001, 0.1]$   
328 (Figure 3B). Apart from the population size reduction associated with infection, these results  
329 have important implications for the ability to detect other parameters of clinical interest -  
330 namely, the presence of selective sweeps associated with beneficial mutations (*e.g.*, potentially  
331 owing to drug-resistance). First, while there is strong statistical power to infer both  $\mu$  and  $\Psi$  from  
332 patient data, there is little power to detect isolated events in the past (Figure 3B). This result,  
333 though unexpected under standard WF assumptions, is intuitive given the non-WF progeny  
334 distributions related to clonality. Namely, the diversity reduction associated with a single  
335 bottleneck event multiple generations in the past is not discernible from the per-generation  
336 diversity reduction related to clonal reproduction. Further, given that a selective sweep is, in fact,  
337 a type of population bottleneck (Barton 1998), this result also demonstrates that detecting  
338 selective sweeps associated with resistance mutations in this non-recombining organism, based

339 on levels and patterns of genomic variation, will be exceedingly difficult. However, this  
340 observation well reconciles the fact that levels of variation do not appear significantly different  
341 between resistant and non-resistant *M.TB* patient populations (Trauner *et al.* 2017) - that is, these  
342 additional evolutionary processes are shaping variation so strongly, that the presence or absence  
343 of a resistance-associated selective sweep does not result in strongly differentiable expectations.

344

### 345 **Implications for characterizing the history of TB in humans**

346 A topic of wide-spread interest in the literature pertains to the history of TB in the human  
347 host. This inference has primarily been made within a phylogenetic context, relying on the  
348 construction of a single consensus sequence per patient. While such a comparison of consensus  
349 sequences can be highly mis-leading when making evolutionary inference (see Renzette *et al.*  
350 2017), these age-estimates also inherently rely on an accurate knowledge of mutation rates in  
351 order to invoke the 'clock-like' accumulation of neutral mutations as a proxy for time (Menardo  
352 *et al.* 2019). As our results demonstrate that previous mutation rate estimates have likely been  
353 downwardly-biased, it is of interest to consider what these revised mutation rates would imply  
354 for this evolutionary history. However, there are at least three difficulties in directly comparing  
355 population-level estimates with previous consensus-based phylogenetic inference. Firstly,  
356 estimates are generally given per year, whereas the preferred evolutionary rate is per generation  
357 (as given here). There is support for one generation per day as a conversion (Cole *et al.* 1998),  
358 though further study is necessary to quantify the correct scaling factor. Secondly, when invoking  
359 a divergence-based clock, previous studies are measuring the neutral mutation rate, given that the  
360 rate of mutation is equivalent to the rate of divergence for neutral mutations only (Kimura 1968).  
361 However, we are here interested in the total mutation rate (that is, the rate at which neutral and  
362 non-neutral mutations arise per generation); therefore, our rate must be parsed into neutral and  
363 non-neutral components to enable appropriate comparison. Similar to the first point, additional  
364 research is necessary in order to better quantify the distribution of fitness effects in *M.TB*, as  
365 understanding the fraction of total mutations represented by neutral mutations is necessary for  
366 the conversion. Finally, we here consider the alleles segregating within a population for  
367 inference (*i.e.*, within a patient), whereas previous studies often call a consensus sequence per  
368 patient (*i.e.*, per population) and make inferences based on a collection of such consensus  
369 sequences. Such a summary of population-level variation into a single sequence is difficult to

370 interpret, though what is evident is that a great majority of rare alleles will be neglected, and thus  
371 only a small subset of total variation (*i.e.*, common alleles) will be considered (Renzette *et al.*  
372 2017). As such, we propose that future evolutionary inference pertaining to TB would benefit  
373 tremendously from a full consideration of within-patient diversity, as we demonstrate here. In  
374 sum, any direct comparison with consensus-based phylogenetic age estimates would be overly  
375 speculative at this juncture.

376

377

## CONCLUSIONS

378 TB patient infection dynamics have remained enigmatic. We here argue that much of the  
379 difficulty in interpreting patterns of variation and evolution has owed to an inappropriate  
380 underlying null model, relying on classical expectations developed for organisms with very  
381 different underlying biological properties. Fortunately, recent theoretical extensions in non-WF  
382 and alternative coalescent models, more appropriate for clonally reproducing organisms, have  
383 created an opportunity to revisit existing *M.TB* patient data. By accounting for the pervasive  
384 purifying selection effects associated with this non-recombining, highly-coding genome, as well  
385 as the skewed progeny distributions inherent to clonal reproduction, we have provided improved  
386 insights into the evolutionary dynamics shaping within-host variation. Further, through a  
387 consideration of these diversity-reducing effects, results suggest an underlying *de novo* mutation  
388 rate that is considerably faster than previously inferred. This largely reconciles the seemingly  
389 contradictory observations of both rapid resistance evolution, but extremely low levels of  
390 population variation. Namely, the population mutation rate may indeed be sufficiently fast to  
391 provide a steady input of beneficial mutations, explaining the rapid resistance evolution  
392 clinically observed. However, recurrent purifying selection and progeny skew act together to  
393 rapidly eliminate segregating variation from the population, reconciling the minimal levels of  
394 variation observed as well as the general homogeneity in levels and distributions of variation in  
395 both resistant and non-resistant patient samples alike. Furthermore, the role of these per-  
396 generation evolutionary forces in shaping patterns of variation is sufficiently strong that periodic  
397 events, including the infection-associated bottleneck and selective sweeps centered on drug-  
398 resistance mutations, will be challenging to detect and quantify on top of these more common  
399 processes.

400

401

## LITERATURE CITED

- 402 Baker, L., T. Brown, M. C. Maiden, and F. Drobniowski. 2004. Silent nucleotide polymorphisms  
403 and a phylogeny for *Mycobacterium tuberculosis*. *Emerg Infect Dis.* 10: 1568–1577.  
404
- 405 Barton, N. H. 1998. The effect of hitch-hiking on neutral genealogies. *Genet Res Camb.* 72(2):  
406 123–33.  
407
- 408 Behr, M. A., P. H. Edelstein, and L. Ramakrishnan. 2018. Revisiting the timetable of  
409 tuberculosis. *BMJ.* 362: k2738.  
410
- 411 Birkner, M., J. Blath, and B. Eldon. 2013. Statistical properties of the site-frequency spectrum  
412 associated with  $\Lambda$ -coalescents. *Genetics.* 195: 1037–53.  
413
- 414 Blath, J., M. Cronjäger Christensen, B. Eldon, and M. Hammer. 2016. The site-frequency  
415 spectrum associated with  $\Xi$ -coalescents. *Theor Popul Biol.* 110: 36–50.  
416
- 417 Bos, K. I., K. M. Harkins, A. Herbig, M. Coscolla, N. Weber *et al.* 2014. Pre-Columbian  
418 mycobacterial genomes reveal seals as a source of New World human tuberculosis. *Nature.* 514:  
419 494–497.  
420
- 421 Brites, D., and S. Gagneux. 2015. Co-evolution of *Mycobacterium tuberculosis* and *Homo*  
422 *sapiens*. *Immunol Rev.* 264: 6–24.  
423
- 424 Brown, T. S., A. Narechania, J. R. Walker, P. J. Planet, P. J. Bifani, *et al.* 2016. Genomic  
425 epidemiology of Lineage 4 *Mycobacterium tuberculosis* subpopulations in New York city and  
426 New Jersey, 1999–2009. *BMC Genomics.* 17: 947.  
427
- 428 Cancino-Muñoz, I., M. Moreno-Molina, V. Furió, G. A. Goig, M. Torres-Puente, *et al.* 2019.  
429 Cryptic resistance mutations associated with misdiagnoses of multidrug-resistant tuberculosis. *J*  
430 *Infect Dis.* 220: 316–320.  
431
- 432 Charlesworth, B., M. T. Morgan, and D. Charlesworth. 1993. The effect of deleterious mutations  
433 on neutral molecular variation. *Genetics.* 134: 1289–1303.  
434
- 435 Colangeli, R., V. L. Arcus, R.T. Cursons, A. Ruthe, N. Karalus, *et al.* 2014. Whole genome  
436 sequencing of *Mycobacterium tuberculosis* reveals slow growth and low mutation rates during  
437 latent infections in humans. *PLoS One.* 9: 1–9.  
438
- 439 Cole, S. T., R. Brosch, J. Parkhill, T. Garnier, C. Churcher, *et al.* 1998. Deciphering the biology  
440 of *Mycobacterium tuberculosis* from the complete genome sequence. *Nature.* 393: 537–544.  
441
- 442 Comas, I., M. Coscolla, T. Luo, S. Borrell, K. E. Holt, *et al.* 2013. Out-of-Africa migration and  
443 Neolithic coexpansion of *Mycobacterium tuberculosis* with modern humans. *Nat Genet.*  
444 45:1176–1182.  
445
- 446 Copin, R., X. Wang, E. Louie, V. Escuyer, M. Coscolla *et al.* 2016. Within host evolution selects  
447 for a dominant genotype of *Mycobacterium tuberculosis* while T cells increase pathogen genetic  
448 diversity. *PLoS Pathog.* 12: e1006111.  
449
- 450 Dean, G. S., S. G. Rhodes, M. Coad, A. O. Whelan, P. J. Cockle, *et al.* 2005. Minimum effective  
451 dose of *Mycobacterium bovis* in cattle. *Infect Immunity.* 73: 6467–6471.  
452
- 453 Der, R., C. L. Epstein, and J. B. Plotkin. 2011. Generalized population models and the nature of  
454 genetic drift. *Theor Popul Biol.* 80: 80–99.  
455
- 456 Dos Vultos, T., O. Mestre, J. Rauzier, M. Golec, N. Rastogi, *et al.* 2008. Evolution and diversity  
457 of clonal bacteria: The paradigm of *Mycobacterium tuberculosis*. *PLoS One.* 3: e1538.  
458
- 459 Duchêne, S., K. E. Holt, F. X. Weill, S. Le Hello, J. Hawkey, *et al.* 2016. Genome-scale rates of  
460 evolutionary change in bacteria. *Microb Genomics.* 2: 1–12.  
461

- 462 Eldon, B., and J. Wakeley. 2006. Coalescent processes when the distribution of offspring number  
463 among individuals is highly skewed. *Genetics*. 172: 2621–33.  
464
- 465 Eldon, B., M. Birkner, J. Blath, and F. Freund. 2015. Can the site-frequency spectrum distinguish  
466 exponential population growth from multiple-merger coalescents? *Genetics*. 199: 841–56.  
467
- 468 Eldholm, V., J. Monteserin, A. Rieux, B. Lopez, B. Sobkowiak, *et al.* 2015. Four decades of  
469 transmission of a multidrug-resistant *Mycobacterium tuberculosis* outbreak strain. *Nat Commun*.  
470 6: 1–9.  
471
- 472 Eldholm, V., J. H. O. Pettersson, O. B. Brynildsrud, A. Kitchen, E.M. Rasmussen, *et al.* 2016.  
473 Armed conflict and population displacement as drivers of the evolution and dispersal of  
474 *Mycobacterium tuberculosis*. *Proc Natl Acad Sci U S A*. 113:13881–6.  
475
- 476 Fleischmann, R. D., D. Alland, J. A. Eisen, L. Carpenter, O. White, *et al.* 2002. Whole-Genome  
477 comparison of *Mycobacterium tuberculosis* clinical and laboratory strains. *J Bacteriol*. 184:  
478 5479–5490.  
479
- 480 Foll, M., Y. P. Poh, N. Renzette, A. Ferrer-Admetlla, C. Bank, *et al.* 2014. Influenza virus drug  
481 resistance: a time-sampled population genetics perspective. *PLoS Genet*. 10: e1004185.  
482
- 483 Foll, M., H. Shim, and J. D. Jensen. 2015. WFABC: A Wright-Fisher ABC-based approach for  
484 inferring effective population sizes and selection coefficients from time-sampled data. *Mol Ecol*  
485 *Resour*. 15(1): 87–98.  
486
- 487 Fonseca, J. D., G.M. Knight, and T. D. McHugh. 2015. The complex evolution of antibiotic  
488 resistance in *Mycobacterium tuberculosis*. *Int J Infect Dis*. 32: 94–100.  
489
- 490 Ford, C.B., P. L Lin, M. Chase, R.R. Shah, O. Iartchouk, *et al.* 2011. Use of whole genome  
491 sequencing to estimate the mutation rate of *Mycobacterium tuberculosis* during latent infection.  
492 *Nat Genet*. 43(5): 482–486.  
493
- 494 Ford, C. B., R.R. Shah, M. Kato-Maeda, S. Gagneux, M. B. Murray *et al.* 2013. *Mycobacterium*  
495 *tuberculosis* mutation rate estimates from different lineages predict substantial differences in the  
496 emergence of drug-resistant tuberculosis. *Nat Genet*. 45: 784–790.  
497
- 498 Haller, B. C., and P.W. Messer. 2019. SLiM 3: Forward genetic simulations beyond the Wright–  
499 Fisher model. *Mol Biol Evol*. 36: 632–637.  
500
- 501 Hershberg, R., M. Lipatov, P. M. Small, H. Sheffer, S. Niemann *et al.* 2008. High functional  
502 diversity in *Mycobacterium tuberculosis* driven by genetic drift and human demography. *PLoS*  
503 *Biol*. 6: e311.  
504
- 505 Huillet, T., and M. Möhle. 2011. Population genetics models with skewed fertilities: A forward  
506 and backward analysis. *Stoch Model*. 27: 521–554.  
507
- 508 Irwin, K. K., S. Laurent, S. Matuszewski, S. Vuilleumier, L. Ormond, *et al.* 2016. On the  
509 importance of skewed offspring distributions and background selection in virus population  
510 genetics. *Heredity*. 117: 393–399.  
511
- 512 Kimura, M. 1968. Evolutionary rate at the molecular level. *Nature*. 217: 624–626.  
513
- 514 Lapierre, M., C. Blin, A. Lambert, G. Achaz, and E. P. C. Rocha. 2016. The impact of selection,  
515 gene conversion, and biased sampling on the assessment of microbial demography. *Mol Biol*  
516 *Evol*. 33: 1711–1725.  
517
- 518 Liu, Q., A. Ma, L. Wei, Y. Pang, B. Wu, *et al.* 2018. China’s tuberculosis epidemic stems from  
519 historical expansion of four strains of *Mycobacterium tuberculosis*. *Nat Ecol Evol*. 2: 1982–1992.  
520
- 521 Matuszewski, S., M. E. Hildebrandt, G. Achaz, and J. D. Jensen. 2018. Coalescent processes  
522 with skewed offspring distributions and nonequilibrium demography. *Genetics*. 208: 323–338.  
523



- 524 Menardo, F., S. Duchêne, D. Brites, and S. Gagneux. 2019. The molecular clock of  
525 *Mycobacterium tuberculosis*. PLoS Pathog. 15: e1008067.  
526
- 527 Mortimer, T. D., A. M. Weber, and C. S. Pepperell. 2018. Signatures of selection at drug  
528 resistance loci in *Mycobacterium tuberculosis*. mSystems. 3: e00108-17.  
529
- 530 Payne, J. L., F. Menardo, A. Trauner, S. Borrell, S.M. Gygli, *et al.* 2019. Transition bias  
531 influences the evolution of antibiotic resistance in *Mycobacterium tuberculosis*. PLOS Biol. 17:  
532 e3000265.  
533
- 534 Pepperell, C. S., V. H. Hoepfner, M. Lipatov, W. Wobeser, G. K. Schoolnik, and M. W.  
535 Feldman. 2010. Bacterial genetic signatures of human social phenomena among *M. tuberculosis*  
536 from an aboriginal Canadian population. Mol Biol Evol. 27: 427–40.  
537
- 538 Pepperell, C. S., A. M. Casto, A. Kitchen, J.M. Granka, O. E. Cornejo, *et al.* 2013. The role of  
539 selection in shaping diversity of natural *M. tuberculosis* populations. PLoS Pathog. 9: e1003543.  
540
- 541 Pfeifer, B., U. Wittelsbürger, S. E. Ramos-Onsins, and M. J. Lercher. 2014. PopGenome: An  
542 efficient swiss army knife for population genomic analyses in R. Mol Biol Evol. 31: 1929–36.  
543
- 544 Phelan, J., F. Coll, R. McNerney, D. B. Ascher, D. E. V. Pires, *et al.* 2016. *Mycobacterium*  
545 *tuberculosis* whole genome sequencing and protein structure modelling provides insights into  
546 anti-tuberculosis drug resistance. BMC Med. 14: 31.  
547
- 548 Renzette, N., S. P. Pfeifer, S. Matuszewski, T. F. Kowalik, and J. D. Jensen. 2017. On the  
549 analysis of intrahost and interhost viral populations: human cytomegalovirus as a case study of  
550 pitfalls and expectations. J Virol. 91: e01976-16.  
551
- 552 Rocha, E. P. C., J. Maynard Smith, L.D. Hurst, M. T. G. Holden, J. E. Cooper, *et al.* 2006.  
553 Comparisons of dN/dS are time dependent for closely related bacterial genomes. J Theor Biol.  
554 239:226–35.  
555
- 556 Sackman, A. M., R. B. Harris, and J.D. Jensen. 2019. Inferring demography and selection in  
557 organisms characterized by skewed offspring distributions. Genetics. 211: 1019-1028.  
558
- 559 Sherman, D. R., and S. Gagneux. 2011. Estimating the mutation rate of *Mycobacterium*  
560 *tuberculosis* during infection. Nat Genet. 43: 400–401.  
561
- 562 Tajima, F. 1989. Statistical method for testing the neutral mutation hypothesis by DNA  
563 polymorphism. Genetics. 123: 585–595.  
564
- 565 Tellier, A., and C. Lemaire. 2014. Coalescence 2.0: A multiple branching of recent theoretical  
566 developments and their applications. Mol Ecol. 23: 2637–2652.  
567
- 568 Thornton, K. R., J. D. Jensen, C. Becquet, and P. Andolfatto. 2007. Progress and prospects in  
569 mapping recent selection in the genome. Heredity. 98: 340–348.  
570
- 571 Trauner, A., Q. Liu, L. E. Via, X. Liu, X. Ruan, *et al.* 2017. The within-host population  
572 dynamics of *Mycobacterium tuberculosis* vary with treatment efficacy. Genome Biol. 18: 71.
- 573 Vahey, M. D., and D. A. Fletcher. 2019. Low Fidelity Assembly of Influenza A Virus Promotes  
574 Escape from Host Cells. Cell. 176: 281-294.
- 575 World Health Organization (WHO). 2018. Global tuberculosis report 2018. World Health  
576 Organization, Geneva.  
577
- 578
- 579
- 580

581

## Supporting Information

582

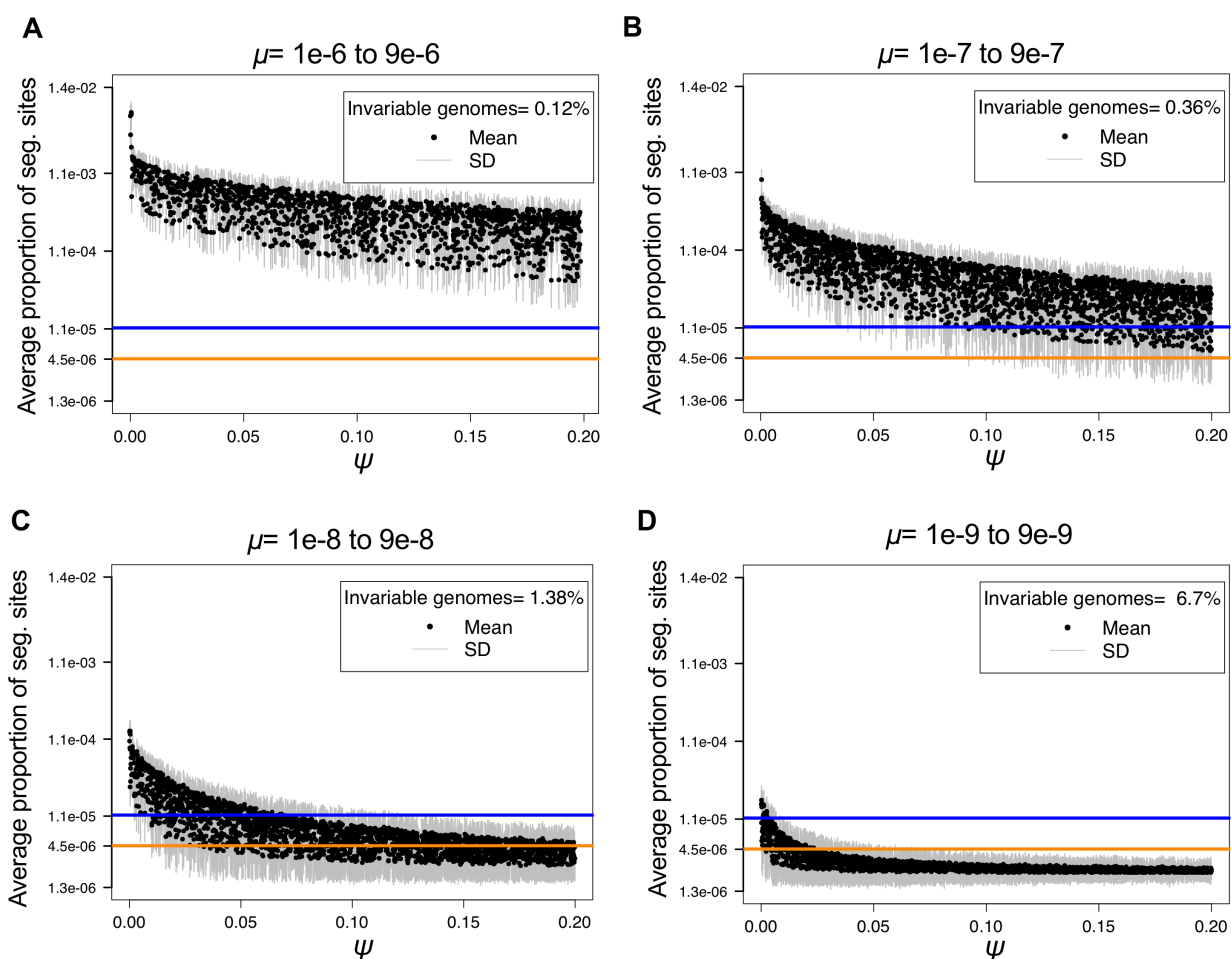

583

584 **Figure S1. Log scale distribution of segregating sites in unfiltered simulated populations as**  
 585 **a function of mutation rate ( $\mu$ ) and progeny skew ( $\Psi$ ).** For each parameter combination of  $\mu$   
 586 and  $\Psi$  drawn from the prior (10,000 in total), 1,000 replicates were simulated, with the mean  
 587 given by the black dot and the standard deviation given by the gray bars.  $\Psi$  proportions are given  
 588 on the X-axis, while the proportion of segregating sites observed in the genome are given on the  
 589 Y-axis. Each panel corresponds to a different order of magnitude of mutation rate: (A)  $1 \times 10^{-6}$  to  
 590  $9 \times 10^{-6}$ , (B)  $1 \times 10^{-7}$  to  $9 \times 10^{-7}$ , (C)  $1 \times 10^{-8}$  to  $9 \times 10^{-8}$ , and (D)  $1 \times 10^{-9}$  to  $9 \times 10^{-9}$ . The colored lines correspond to  
 591 two examples of the proportion of segregating sites observed genome-wide in empirical patient  
 592 data: 20 segregating sites as a mean (orange) and 50 segregating sites as the maximum observed  
 593 from patient\_10 (blue) (Trauner *et al.* 2017).

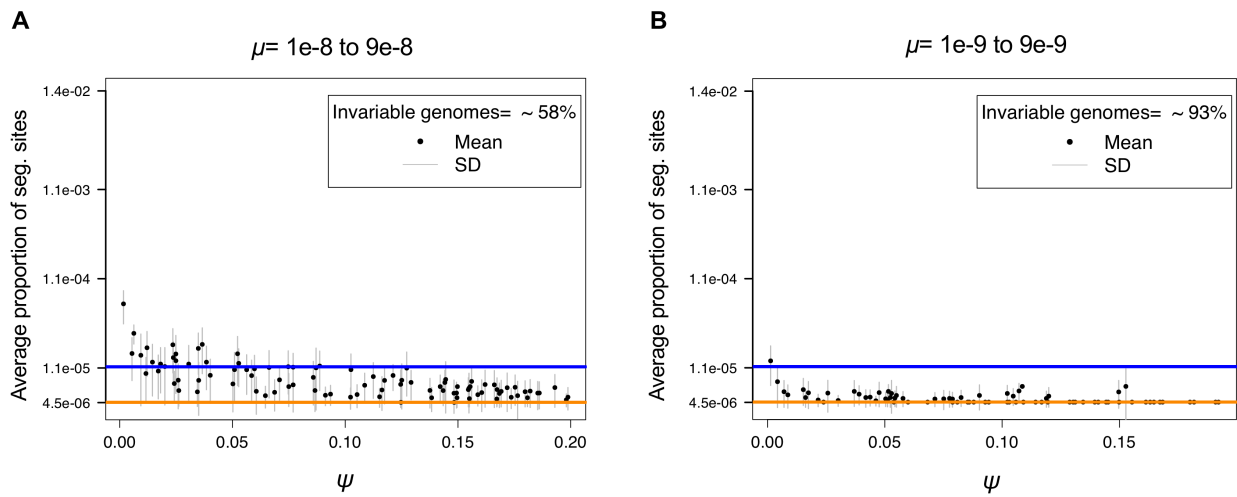

594

595 **Figure S2. Log scale distribution of segregating sites in filtered simulated populations of  $N$**

596 **= 25,000 as a function of mutation rate ( $\mu$ ) and progeny skew ( $\Psi$ ).** For each parameter

597 combination of  $\mu$  and  $\Psi$  drawn from the prior (100 in total), 100 replicates were simulated, with

598 the mean given by the black dot and the standard deviation given by the gray bars.  $\Psi$  proportions

599 are given on the X-axis, while the proportion of segregating sites observed in the genome are

600 given on the Y-axis. Each panel corresponds to a different order of magnitude of mutation rate:

601 (A)  $1e-8$  to  $9e-8$ , and (B)  $1e-9$  to  $9e-9$ . The colored lines correspond to two examples of the

602 proportion of segregating sites observed genome-wide in empirical patient data: 20 segregating

603 sites (orange) and 50 segregating sites (blue) (Trauner *et al.* 2017). As shown, inference remains

604 consistent with the results of Figure 2, even under this 25x larger population size.

605

606

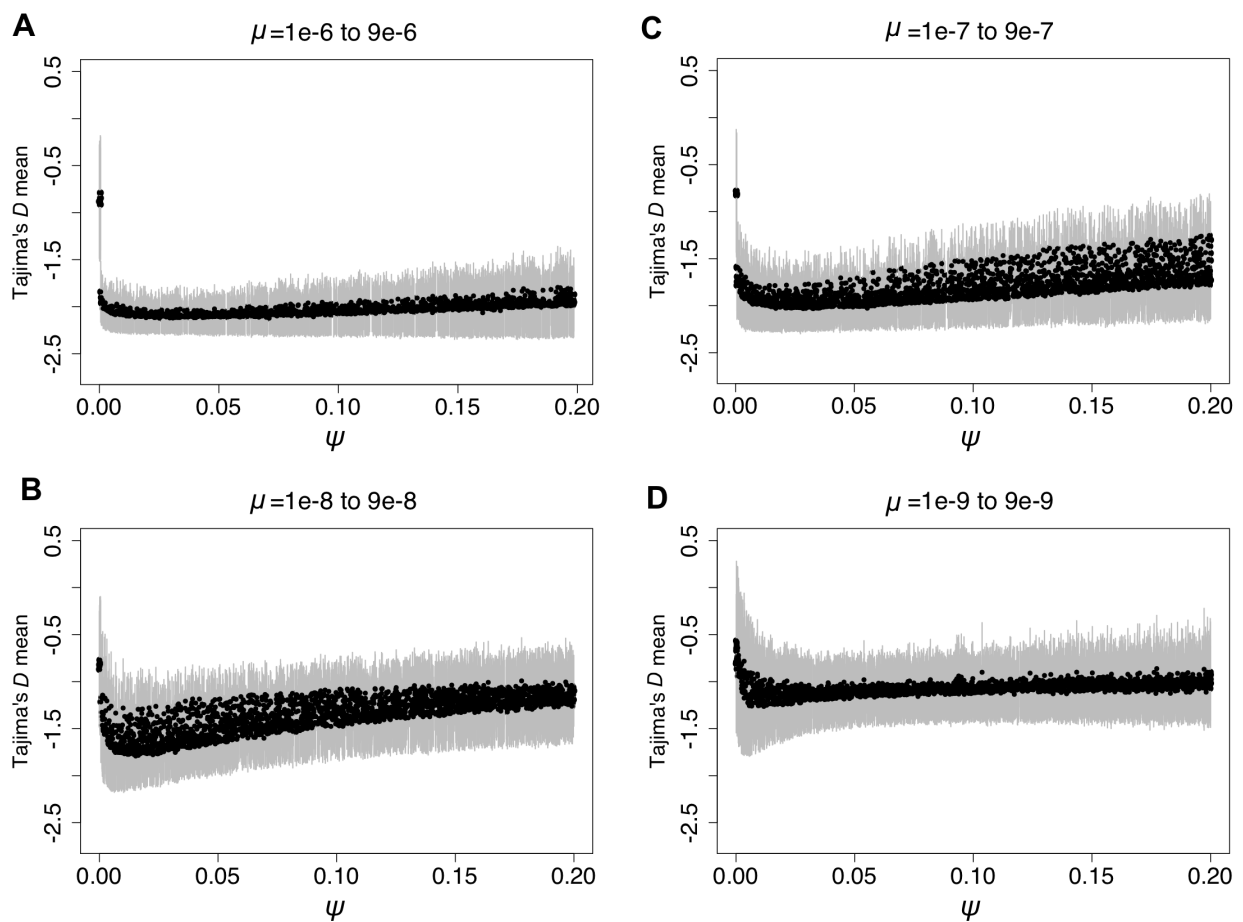

607

608 **Figure S3. The shape of the site frequency spectrum in unfiltered simulated populations, as**  
609 **summarized by Tajima's  $D$ , as a function of mutation rate ( $\mu$ ) and progeny skew ( $\Psi$ ).** For  
610 each parameter combination of  $\mu$  and  $\Psi$  drawn from the prior distributions (10,000 in total),  
611 1,000 replicates were simulated, with the mean given by the black dot and the standard deviation  
612 given by the gray bars.  $\Psi$  proportions are given on the X-axis, while the mean Tajima's  $D$  is  
613 given on the Y-axis. Each panel corresponds to a different order of magnitude of mutation rate:  
614 (A)  $1e-6$  to  $9e-6$ , (B)  $1e-7$  to  $9e-7$ , (C)  $1e-8$  to  $9e-8$ , and (D)  $1e-9$  to  $9e-9$ . As shown, the  
615 distribution of variation expected to be observed in the genome differs as a function of these two  
616 parameters - with a strong excess of rare mutations (negative  $D$ ) observed as the WF model is  
617 initially violated at small values of  $\Psi$ , with a slight recovery towards 0 (and larger standard  
618 deviations) observed as  $\Psi$  gets larger, owing to the rapidly decreasing number of segregating  
619 sites associated with increased progeny skew.

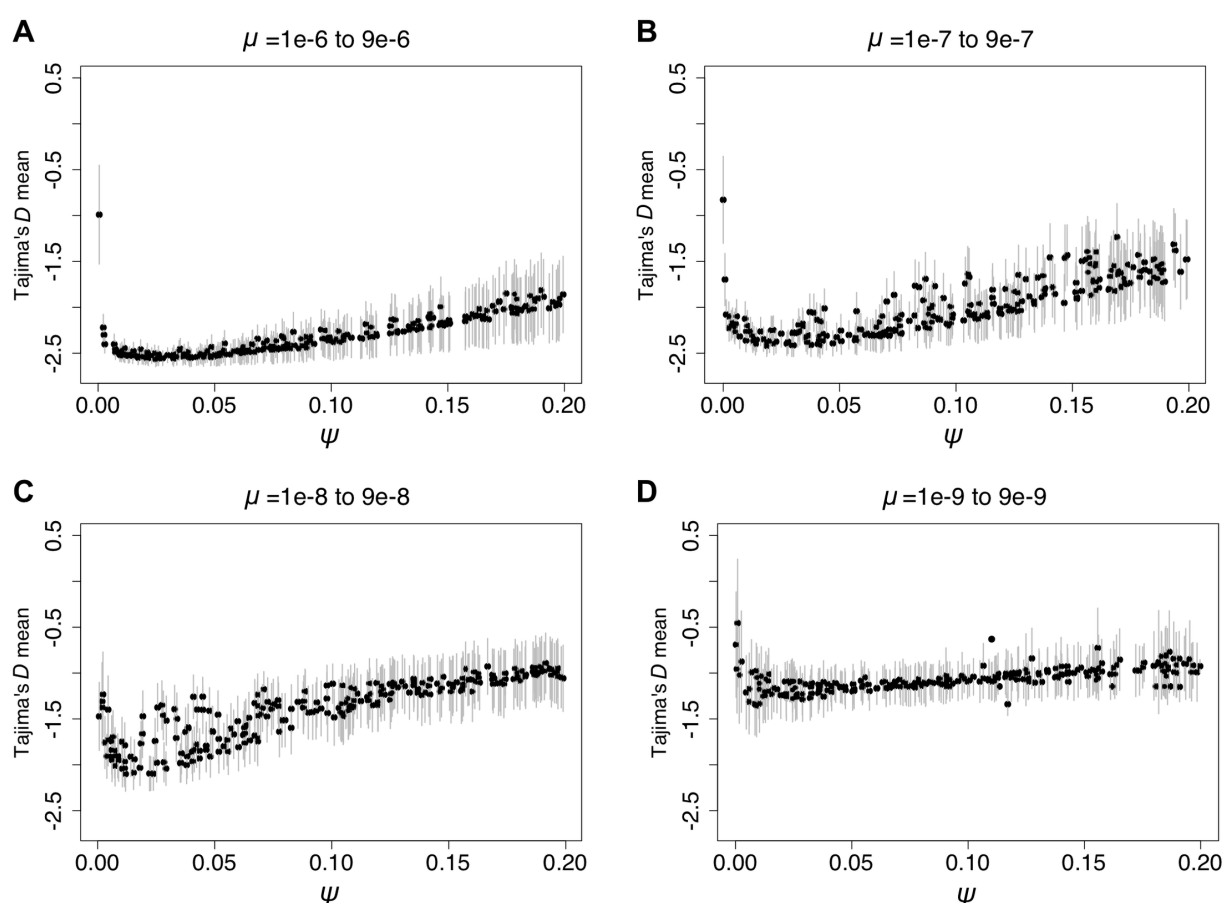

620  
621 **Figure S4. The shape of the site frequency spectrum (SFS), as summarized by Tajima's  $D$ ,**  
622 **in simulated populations after filtering out segregating sites under 2% frequency, as a**  
623 **function of mutation rate ( $\mu$ ) and progeny skew ( $\Psi$ ).** 1,000 parameters combinations were  
624 used. For each parameter combination of  $\mu$  and  $\Psi$  drawn from the prior distributions, 1,000  
625 replicates were simulated, with the mean given by the black dot and the standard deviation given  
626 by the gray bars.  $\Psi$  proportions are given on the X-axis, while the mean Tajima's  $D$  is given on  
627 the Y-axis. Each panel corresponds to a different order of magnitude of mutation rate: (A)  $1e-6$   
628 to  $9e-6$ , (B)  $1e-7$  to  $9e-7$ , (C)  $1e-8$  to  $9e-8$ , and (D)  $1e-9$  to  $9e-9$ . As shown, the distribution of  
629 variation expected to be observed in the genome differs as a function of these two parameters -  
630 with a strong excess of rare mutations (negative  $D$ ) observed as the WF model is initially  
631 violated at small values of  $\Psi$ , with a slight recovery towards 0 (and larger standard deviations)  
632 observed as  $\Psi$  gets larger, owing to the rapidly decreasing number of segregating sites associated  
633 with increased progeny skew.

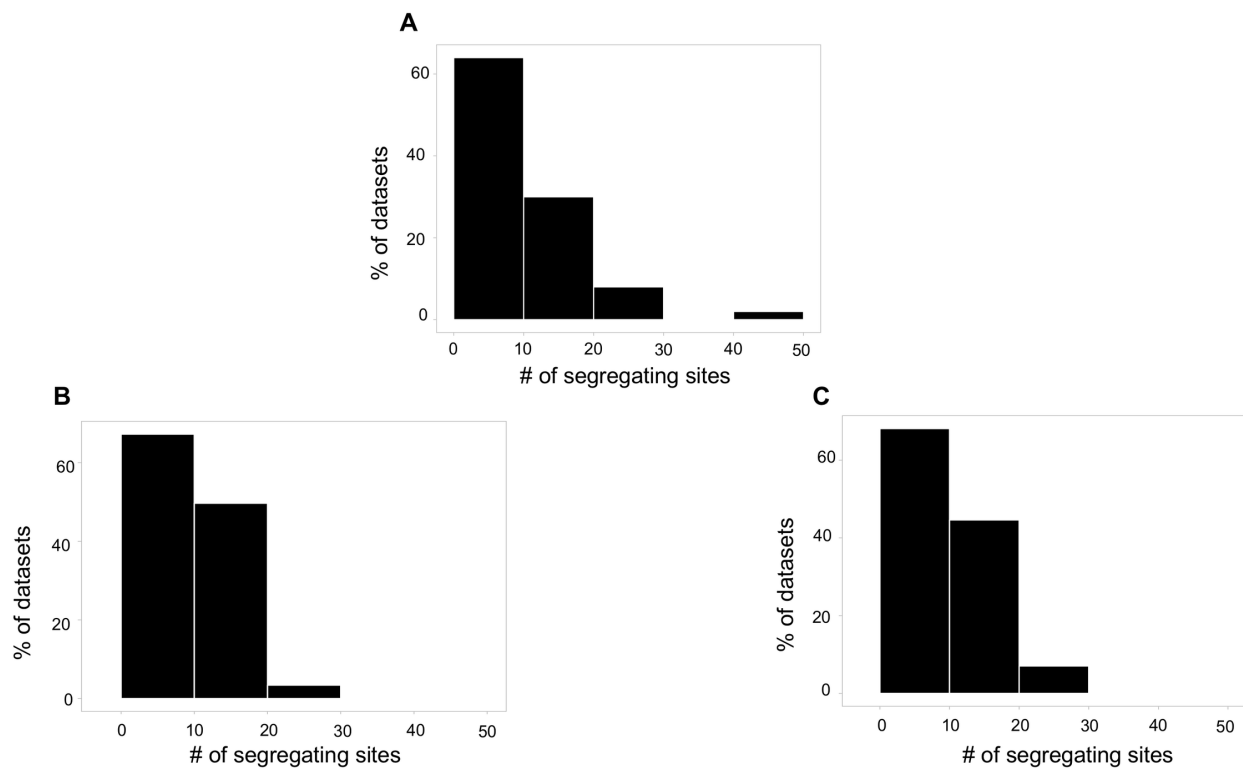

634

635 **Figure S5. The distribution of segregating sites in real versus simulated datasets.**

636 Comparison of the number of segregating sites observed from (A) patient samples (Trauner *et al.*  
637 2017), (B) simulated datasets with  $\mu = 3.1e-8$  and  $\Psi = 0.02$ , resulting in the same mean number  
638 of segregating sites as observed in patients, and (C) simulated datasets with  $\mu = 3.7e-7$  and  $\Psi =$   
639 0.18, also resulting in the same mean number of segregating sites as observed in patients. Thus,  
640 these two point estimates essentially demarcate the boundaries on the joint posterior ridge  
641 (Figure 3).

642

643

644

645

646

647

648

649

650

651

652

653

654 **Table S1. Simulation results.** Parameters simulated, ordered by descending mutation rate ( $\mu$ )  
 655 and corresponding values of progeny skew ( $\psi$ ) and bottleneck severity ( $N_2$ ). Given are the mean  
 656 and standard deviation of the summary statistics from 1000 replicates.

| Parameters              |                         |                       | Summary statistics |                 |                 |               |                      |
|-------------------------|-------------------------|-----------------------|--------------------|-----------------|-----------------|---------------|----------------------|
| Mutation rate ( $\mu$ ) | Progeny skew ( $\psi$ ) | Bottle-neck ( $N_2$ ) | Tajima's $D$ mean  | Tajima's $D$ sd | Seg. sites mean | Seg. Sites sd | % invariable genomes |
| 1.00323E-06             | 0.083741128             | 30                    | -2.268823115       | 0.213071226     | 73.25           | 27.92044146   | 0                    |
| 1.05258E-06             | 0.05424026              | 51                    | -2.39378792        | 0.140975196     | 114.033         | 38.29559326   | 0                    |
| 1.07427E-06             | 0.068391187             | 79                    | -2.342687183       | 0.150033316     | 62.118          | 22.00859956   | 0                    |
| 1.14948E-06             | 0.174968669             | 27                    | -1.84867593        | 0.350954908     | 34.148          | 14.59140175   | 0                    |
| 1.15893E-06             | 0.078976259             | 55                    | -2.314091665       | 0.187904351     | 87.857          | 32.7311454    | 0                    |
| 1.16072E-06             | 0.147004609             | 47                    | -1.994103492       | 0.324323366     | 43.572          | 18.32666589   | 0                    |
| 1.17846E-06             | 0.095707498             | 50                    | -2.242540595       | 0.219702856     | 74.732          | 27.21637204   | 0                    |
| 1.21809E-06             | 0.002234156             | 94                    | -2.219989055       | 0.142920773     | 530.177         | 111.4160545   | 0                    |
| 1.27435E-06             | 0.035230792             | 98                    | -2.45132687        | 0.111998152     | 184.69          | 55.9886652    | 0                    |
| 1.34490E-06             | 0.072224963             | 2                     | -2.361174432       | 0.168335271     | 108.132         | 36.59953691   | 0                    |
| 1.36631E-06             | 0.190031564             | 88                    | -1.814642081       | 0.40537193      | 36.049          | 15.11837174   | 0                    |
| 1.37186E-06             | 0.178587611             | 8                     | -1.856448312       | 0.377166171     | 38.995          | 16.4323156    | 0                    |
| 1.40763E-06             | 0.018259159             | 36                    | -2.459363944       | 0.105067026     | 299.336         | 81.75943805   | 0                    |
| 1.41886E-06             | 0.048682507             | 78                    | -2.43334348        | 0.133550871     | 159.515         | 54.08471995   | 0                    |
| 1.45413E-06             | 0.125929607             | 76                    | -2.130629042       | 0.278288809     | 65.433          | 24.43773135   | 0                    |
| 1.49860E-06             | 0.034752818             | 87                    | -2.470499994       | 0.107467985     | 206.161         | 63.08506007   | 0                    |
| 1.51763E-06             | 0.142547134             | 57                    | -2.068036111       | 0.303344227     | 58.533          | 21.69316723   | 0                    |
| 1.51902E-06             | 0.127470119             | 5                     | -2.137500358       | 0.268938506     | 67.735          | 25.93629631   | 0                    |
| 1.54224E-06             | 0.097141999             | 10                    | -2.252101995       | 0.212272889     | 91.618          | 33.4446501    | 0                    |
| 1.56157E-06             | 0.127268671             | 73                    | -2.134927218       | 0.275793862     | 69.918          | 27.12203681   | 0                    |
| 1.60310E-06             | 0.002535884             | 89                    | -2.300181435       | 0.120396219     | 581.913         | 125.9045805   | 0                    |
| 1.60552E-06             | 0.114838011             | 13                    | -2.183291358       | 0.245635241     | 77.144          | 29.58409171   | 0                    |
| 1.62498E-06             | 0.185445543             | 44                    | -1.873943114       | 0.390190692     | 43.922          | 18.62054351   | 0                    |
| 1.70401E-06             | 0.079764023             | 56                    | -2.341980367       | 0.184901919     | 120.627         | 42.28086497   | 0                    |
| 1.76944E-06             | 0.179382064             | 27                    | -1.909361982       | 0.369374432     | 48.587          | 21.04122535   | 0                    |
| 1.79775E-06             | 0.006932201             | 87                    | -2.40224289        | 0.110270435     | 504.71          | 117.2538458   | 0                    |
| 1.80560E-06             | 0.066056427             | 45                    | -2.399866678       | 0.146367114     | 150.828         | 51.46002867   | 0                    |
| 1.81127E-06             | 0.172076915             | 37                    | -1.933554838       | 0.370411584     | 53.249          | 20.5200895    | 0                    |
| 1.81152E-06             | 0.089215444             | 31                    | -2.320938106       | 0.183317642     | 115.119         | 41.23101789   | 0                    |
| 1.81640E-06             | 0.011295921             | 70                    | -2.44570659        | 0.100980653     | 436.728         | 103.7460807   | 0                    |
| 1.82390E-06             | 0.171978735             | 48                    | -1.941706405       | 0.363939575     | 54.583          | 21.79017951   | 0                    |
| 1.86518E-06             | 0.103034261             | 72                    | -2.26005553        | 0.231646438     | 99.9            | 36.87109271   | 0                    |
| 1.89217E-06             | 0.066288267             | 30                    | -2.406201331       | 0.157309604     | 156.594         | 51.49237447   | 0                    |
| 1.90714E-06             | 0.07621348              | 53                    | -2.365034087       | 0.180909287     | 140.437         | 50.61689541   | 0                    |
| 1.91685E-06             | 0.091231741             | 14                    | -2.319495906       | 0.20669643      | 119.203         | 41.9865295    | 0                    |
| 1.98106E-06             | 0.071256528             | 25                    | -2.389881138       | 0.162727021     | 153.298         | 52.88578355   | 0                    |
| 2.04999E-06             | 0.06206469              | 89                    | -2.427399389       | 0.142401025     | 173.69          | 56.74013873   | 0                    |
| 2.09647E-06             | 0.038639738             | 42                    | -2.485880639       | 0.10741806      | 247.237         | 74.11912355   | 0                    |
| 2.11204E-06             | 0.169388078             | 57                    | -1.984453843       | 0.330080624     | 48.27233429     | 17.97727958   | 30.6                 |
| 2.12986E-06             | 0.11706933              | 77                    | -2.215467125       | 0.253808997     | 100.631         | 37.99700793   | 0                    |
| 2.15406E-06             | 0.141870623             | 51                    | -2.10605375        | 0.274222571     | 58.14           | 22.20408569   | 0                    |
| 2.18101E-06             | 0.163422243             | 18                    | -2.017817637       | 0.336968578     | 69.003          | 27.61317581   | 0                    |
| 2.20091E-06             | 0.015172907             | 8                     | -2.477645048       | 0.094911447     | 427.758         | 106.3263595   | 0                    |

|             |             |    |              |             |             |             |      |
|-------------|-------------|----|--------------|-------------|-------------|-------------|------|
| 2.20482E-06 | 0.021126721 | 82 | -2.491883563 | 0.09687563  | 365.716     | 102.0283643 | 0    |
| 2.20725E-06 | 0.188675008 | 28 | -1.902430476 | 0.40017778  | 57.49       | 23.34714092 | 0    |
| 2.21559E-06 | 0.0871031   | 42 | -2.343760706 | 0.186671872 | 139.264     | 49.71911397 | 0    |
| 2.23573E-06 | 0.187063106 | 45 | -1.907741686 | 0.358805823 | 44.854      | 17.1103316  | 0    |
| 2.27509E-06 | 0.125403484 | 5  | -2.203743064 | 0.23813124  | 98.003      | 36.40753355 | 0    |
| 2.27948E-06 | 0.137483753 | 32 | -2.145546977 | 0.283584244 | 87.13       | 33.44340834 | 0    |
| 2.35400E-06 | 0.046762946 | 44 | -2.475339189 | 0.123211173 | 236.372     | 73.3149828  | 0    |
| 2.52429E-06 | 0.191032835 | 83 | -1.885597745 | 0.407044539 | 63.423      | 26.09231457 | 0    |
| 2.61389E-06 | 0.024278147 | 67 | -2.503128139 | 0.091279236 | 385.128     | 108.5069277 | 0    |
| 2.66469E-06 | 0.143581712 | 59 | -2.113962185 | 0.314452043 | 96.28       | 36.99459691 | 0    |
| 2.70701E-06 | 0.19942529  | 66 | -1.86045003  | 0.416596013 | 64.021      | 25.95500378 | 0    |
| 2.73336E-06 | 0.025876486 | 80 | -2.511972061 | 0.089679995 | 376.284     | 107.5730603 | 0    |
| 2.86631E-06 | 0.029798342 | 3  | -2.521767014 | 0.080400891 | 166.654     | 52.68561529 | 0    |
| 2.87173E-06 | 0.142357014 | 34 | -2.125391995 | 0.297032848 | 104.745     | 38.77612104 | 0    |
| 2.93144E-06 | 0.053739131 | 47 | -2.465139706 | 0.132375425 | 251.39      | 82.07500354 | 0    |
| 2.94178E-06 | 0.096296588 | 12 | -2.342917275 | 0.184995675 | 157.707     | 54.81443033 | 0    |
| 3.00818E-06 | 0.080858986 | 52 | -2.394854503 | 0.172760168 | 187.604     | 66.3320822  | 0    |
| 3.01815E-06 | 0.134974227 | 3  | -2.177646077 | 0.277538657 | 114.739     | 40.90511101 | 0    |
| 3.02499E-06 | 0.036913487 | 31 | -2.506608647 | 0.103410471 | 325.834     | 102.6217992 | 0    |
| 3.02691E-06 | 0.099126233 | 97 | -2.323489639 | 0.207079361 | 160.461     | 57.37567819 | 0    |
| 3.04722E-06 | 0.177489278 | 20 | -1.996511616 | 0.345804407 | 82.887      | 33.44183888 | 0    |
| 3.08878E-06 | 0.166632161 | 47 | -2.035520178 | 0.316529906 | 64.37974684 | 25.7113447  | 52.6 |
| 3.10911E-06 | 0.074397827 | 68 | -2.423287664 | 0.162287959 | 208.453     | 73.55282326 | 0    |
| 3.15283E-06 | 0.105716416 | 97 | -2.30220408  | 0.21672073  | 150.87      | 55.34531782 | 0    |
| 3.16156E-06 | 0.060129296 | 50 | -2.470586921 | 0.129254198 | 246.51      | 82.18757021 | 0    |
| 3.18711E-06 | 0.187231211 | 95 | -1.932400843 | 0.397556019 | 80.04       | 32.79457095 | 0    |
| 3.19924E-06 | 0.160557925 | 67 | -2.075862881 | 0.323439171 | 98.938      | 36.62460263 | 0    |
| 3.21256E-06 | 0.197806677 | 97 | -1.901179917 | 0.411388562 | 73.482      | 30.09819891 | 0    |
| 3.23557E-06 | 0.096667975 | 82 | -2.33429967  | 0.203058174 | 171.881     | 60.98852711 | 0    |
| 3.23876E-06 | 0.032477714 | 5  | -2.513252273 | 0.099558469 | 371.414     | 113.9971313 | 0    |
| 3.23960E-06 | 0.106816905 | 45 | -2.299007369 | 0.227105568 | 155.651     | 57.23310954 | 0    |
| 3.25363E-06 | 0.010197306 | 81 | -2.470389732 | 0.091743258 | 615.458     | 144.4888621 | 0    |
| 3.34148E-06 | 0.09036916  | 69 | -2.360354627 | 0.183471731 | 188.152     | 66.35187614 | 0    |
| 3.38046E-06 | 0.075316468 | 10 | -2.423214672 | 0.158800999 | 223.286     | 76.95137242 | 0    |
| 3.38234E-06 | 0.183560797 | 17 | -1.992111459 | 0.318425592 | 62.81481481 | 24.34369074 | 56.8 |
| 3.43922E-06 | 0.052317077 | 29 | -2.496508588 | 0.110215045 | 143.2914573 | 48.37521773 | 60.2 |
| 3.51100E-06 | 0.091190111 | 30 | -2.36341697  | 0.189148653 | 191.025     | 66.20401307 | 0    |
| 3.62777E-06 | 0.174054427 | 62 | -2.020730272 | 0.375769104 | 98.791      | 38.18973389 | 0    |
| 3.63591E-06 | 0.020922852 | 17 | -2.523624462 | 0.086263393 | 491.719     | 134.7929344 | 0    |
| 3.71752E-06 | 0.007424968 | 35 | -2.455211889 | 0.089901547 | 751.515     | 171.6138721 | 0    |
| 3.72700E-06 | 0.071519747 | 16 | -2.439368425 | 0.144560149 | 246.579     | 84.58926115 | 0    |
| 3.76115E-06 | 0.133389599 | 45 | -2.207183842 | 0.258449929 | 139.558     | 51.31061699 | 0    |
| 3.76891E-06 | 0.023000307 | 52 | -2.525610163 | 0.084925102 | 479.201     | 133.0190688 | 0    |
| 3.77969E-06 | 0.058721949 | 18 | -2.477337191 | 0.127971332 | 283.144     | 92.52348815 | 0    |
| 3.80658E-06 | 0.061662345 | 31 | -2.456041954 | 0.134864962 | 271.953     | 91.58006169 | 0    |
| 3.81465E-06 | 0.043844958 | 47 | -2.504175042 | 0.106799816 | 345.876     | 108.220702  | 0    |
| 3.85422E-06 | 0.045874048 | 89 | -2.509525385 | 0.095470736 | 162.163     | 51.36789943 | 0    |
| 3.89087E-06 | 0.157624492 | 50 | -2.100215392 | 0.317948113 | 117.258     | 45.17885085 | 0    |
| 3.92237E-06 | 0.105328979 | 66 | -2.325915846 | 0.216457163 | 183.751     | 65.4317225  | 0    |
| 3.93140E-06 | 0.097279879 | 22 | -2.348739672 | 0.199189136 | 197.806     | 70.31557896 | 0    |
| 4.05703E-06 | 0.081612311 | 27 | -2.401847125 | 0.167117424 | 231.15      | 77.99177018 | 0    |
| 4.06679E-06 | 0.052914714 | 99 | -2.49677306  | 0.114718297 | 320.979     | 100.8842713 | 0    |



|             |             |    |              |             |             |             |      |
|-------------|-------------|----|--------------|-------------|-------------|-------------|------|
| 4.08698E-06 | 0.162083695 | 39 | -2.082530637 | 0.338399342 | 119.814     | 46.42963617 | 0    |
| 4.11463E-06 | 0.147405055 | 97 | -2.161054228 | 0.286645225 | 136.814     | 51.00116197 | 0    |
| 4.13130E-06 | 0.071193318 | 91 | -2.450204823 | 0.139381082 | 261.729     | 88.2090494  | 0    |
| 4.13286E-06 | 0.178097374 | 72 | -2.005132374 | 0.379378644 | 104.374     | 41.08281784 | 0    |
| 4.13787E-06 | 0.183625187 | 25 | -1.98190994  | 0.385122469 | 105.096     | 42.00653917 | 0    |
| 4.18713E-06 | 0.115383656 | 91 | -2.279541427 | 0.233838275 | 177.233     | 61.31608576 | 0    |
| 4.21578E-06 | 0.063481085 | 74 | -2.465993109 | 0.131570546 | 283.843     | 93.59634944 | 0    |
| 4.22855E-06 | 0.044531836 | 24 | -2.514562421 | 0.10546776  | 365.052     | 116.1490934 | 0    |
| 4.26758E-06 | 0.064487967 | 61 | -2.466350062 | 0.137762942 | 292.162     | 96.33562326 | 0    |
| 4.27081E-06 | 0.057983672 | 56 | -2.480132515 | 0.126682888 | 310.77      | 98.58679656 | 0    |
| 4.27458E-06 | 0.051484956 | 70 | -2.502621768 | 0.119753276 | 341.951     | 109.9885725 | 0    |
| 4.28112E-06 | 0.081497163 | 85 | -2.414976591 | 0.172164667 | 245.994     | 82.79997464 | 0    |
| 4.33473E-06 | 0.18325412  | 16 | -1.996033612 | 0.346812486 | 73.077      | 28.78485085 | 0    |
| 4.34382E-06 | 0.089599967 | 85 | -2.389938479 | 0.160930254 | 126.775     | 44.33068446 | 0    |
| 4.35363E-06 | 0.031937187 | 16 | -2.533881587 | 0.088578631 | 441.809     | 130.8727863 | 0    |
| 4.38638E-06 | 0.170332639 | 1  | -2.043150239 | 0.357100011 | 121.465     | 47.98244565 | 0    |
| 4.40373E-06 | 0.180950653 | 97 | -2.02066542  | 0.34257131  | 112.818     | 44.79637922 | 0    |
| 4.44451E-06 | 0.009495684 | 39 | -2.48671751  | 0.089372565 | 763.837     | 181.69039   | 0    |
| 4.46435E-06 | 0.06388055  | 45 | -2.476451069 | 0.114443462 | 152.5642633 | 51.75499953 | 68.1 |
| 4.66398E-06 | 0.161534783 | 2  | -2.101108883 | 0.320353546 | 88.532      | 32.16074143 | 0    |
| 4.67889E-06 | 0.147050753 | 36 | -2.166447463 | 0.301217068 | 148.635     | 55.85450296 | 0    |
| 4.68696E-06 | 0.159150751 | 5  | -2.118221146 | 0.316422699 | 135.536     | 51.71722513 | 0    |
| 4.69022E-06 | 0.179421998 | 68 | -2.007102216 | 0.375179908 | 119.294     | 47.68985097 | 0    |
| 4.76545E-06 | 0.137827068 | 66 | -2.198064664 | 0.283620018 | 163.71      | 60.01127605 | 0    |
| 4.82616E-06 | 0.09864471  | 54 | -2.360936732 | 0.198095182 | 226.198     | 78.88992595 | 0    |
| 4.90490E-06 | 0.068348785 | 36 | -2.463883915 | 0.137071673 | 309.916     | 98.59704012 | 0    |
| 4.92672E-06 | 0.037491836 | 45 | -2.53464184  | 0.089585124 | 437.73      | 134.1963254 | 0    |
| 4.96090E-06 | 0.194931247 | 66 | -1.943824358 | 0.406728845 | 111.012     | 45.51902721 | 0    |
| 4.99886E-06 | 0.084205461 | 81 | -2.415349811 | 0.164869693 | 271.626     | 90.2507802  | 0    |
| 5.03965E-06 | 0.010818434 | 41 | -2.502006876 | 0.084952354 | 765.118     | 187.5172814 | 0    |
| 5.08458E-06 | 0.092243176 | 67 | -2.395655224 | 0.168627216 | 137.778     | 50.38058077 | 0    |
| 5.19177E-06 | 0.081319929 | 51 | -2.423738507 | 0.158052048 | 279.023     | 94.15976068 | 0    |
| 5.19312E-06 | 0.177636988 | 13 | -2.014820856 | 0.373052196 | 131.709     | 50.46064403 | 0    |
| 5.28653E-06 | 0.159011493 | 5  | -2.111142553 | 0.312880421 | 151.001     | 57.19405703 | 0    |
| 5.33565E-06 | 0.036433081 | 70 | -2.536428429 | 0.093074865 | 466.303     | 140.9724811 | 0    |
| 5.34859E-06 | 0.032126559 | 79 | -2.536982301 | 0.092139694 | 502.513     | 146.1721866 | 0    |
| 5.34876E-06 | 0.074147757 | 73 | -2.446396385 | 0.141400751 | 307.527     | 98.73268666 | 0    |
| 5.37165E-06 | 0.070847357 | 98 | -2.464197299 | 0.14237841  | 318.068     | 106.417687  | 0    |
| 5.39080E-06 | 0.148057423 | 61 | -2.17056632  | 0.291890977 | 164.095     | 58.76678918 | 0    |
| 5.42598E-06 | 0.033790744 | 76 | -2.537953881 | 0.090863628 | 490.955     | 145.8321981 | 0    |
| 5.45932E-06 | 0.150455894 | 94 | -2.138987203 | 0.303190167 | 163.692     | 61.6935753  | 0    |
| 5.49750E-06 | 0.013493694 | 73 | -2.51213801  | 0.084049365 | 745.896     | 194.3784818 | 0    |
| 5.50896E-06 | 0.148013485 | 41 | -2.179766751 | 0.27981175  | 171.601     | 64.51595235 | 0    |
| 5.52108E-06 | 0.017269882 | 8  | -2.530306408 | 0.085229634 | 680.684     | 183.9934285 | 0    |
| 5.59879E-06 | 0.079697476 | 68 | -2.42298135  | 0.161658037 | 302.269     | 106.0762877 | 0    |
| 5.61346E-06 | 0.039363853 | 66 | -2.533772282 | 0.099950806 | 457.639     | 145.3699457 | 0    |
| 5.62852E-06 | 0.134515261 | 5  | -2.229571912 | 0.254274997 | 187.168     | 68.44351167 | 0    |
| 5.63844E-06 | 0.165350342 | 49 | -2.092404381 | 0.342592855 | 154.336     | 57.47631365 | 0    |
| 5.64346E-06 | 0.197158598 | 52 | -1.948358035 | 0.406635491 | 120.541     | 47.30573064 | 0    |
| 5.66941E-06 | 0.014846757 | 37 | -2.527392022 | 0.084809703 | 731.887     | 186.8805516 | 0    |
| 5.77125E-06 | 0.039009255 | 20 | -2.534196812 | 0.096215357 | 475.949095  | 151.0681737 | 11.6 |
| 5.79828E-06 | 0.102032778 | 31 | -2.347687999 | 0.215802247 | 252.055     | 87.4202853  | 0    |

|             |             |    |              |             |             |             |      |
|-------------|-------------|----|--------------|-------------|-------------|-------------|------|
| 5.81859E-06 | 0.018901769 | 41 | -2.536851337 | 0.081223929 | 670.963     | 187.6406316 | 0    |
| 5.86554E-06 | 0.119172716 | 42 | -2.289135668 | 0.247164645 | 224.895     | 80.54838308 | 0    |
| 5.87513E-06 | 0.009945494 | 12 | -2.529829888 | 0.065175172 | 354.518     | 90.49086292 | 0    |
| 5.91748E-06 | 0.108639825 | 8  | -2.330618799 | 0.21801644  | 245.334     | 89.73793702 | 0    |
| 5.95191E-06 | 0.163364246 | 88 | -2.0916936   | 0.343509769 | 159.667     | 63.38283281 | 0    |
| 5.96091E-06 | 0.087444079 | 18 | -2.41819886  | 0.161575551 | 153.277     | 55.05082074 | 0    |
| 5.99521E-06 | 0.181327866 | 30 | -2.035142738 | 0.356564966 | 144.429     | 55.8730414  | 0    |
| 6.01869E-06 | 0.177907004 | 55 | -2.06257483  | 0.326697733 | 147.444     | 57.72470013 | 0    |
| 6.05063E-06 | 0.002877447 | 32 | -2.401946034 | 0.096067514 | 1198.869    | 255.7148841 | 0    |
| 6.07731E-06 | 0.01955547  | 1  | -2.541352169 | 0.080011363 | 681.491     | 179.4129955 | 0    |
| 6.14328E-06 | 0.060748557 | 55 | -2.49084606  | 0.129369442 | 383.209     | 129.8532063 | 0    |
| 6.21723E-06 | 0.043054603 | 2  | -2.532038626 | 0.097144385 | 474.703     | 147.9193257 | 0    |
| 6.22292E-06 | 0.051537806 | 68 | -2.522713259 | 0.107135081 | 422.113     | 136.9644972 | 0    |
| 6.28351E-06 | 0.04833965  | 58 | -2.528331181 | 0.102515432 | 449.096     | 145.2344237 | 0    |
| 6.28653E-06 | 0.081165105 | 44 | -2.431136744 | 0.155267755 | 321.523     | 106.133132  | 0    |
| 6.32747E-06 | 0.193498773 | 51 | -2.01025924  | 0.377904736 | 138.227     | 54.61023484 | 0    |
| 6.34468E-06 | 0.027728583 | 71 | -2.553733432 | 0.080758412 | 581.877     | 172.5323601 | 0    |
| 6.34891E-06 | 0.09256866  | 32 | -2.398773229 | 0.179032918 | 295.067     | 100.3194124 | 0    |
| 6.36937E-06 | 0.142826501 | 50 | -2.200359147 | 0.272622369 | 120.961     | 46.28833643 | 0    |
| 6.39225E-06 | 0.000498444 | 97 | -0.990254509 | 0.538172921 | 4711.724    | 1154.140446 | 0    |
| 6.42691E-06 | 0.049874555 | 75 | -2.520309606 | 0.10979855  | 442.701     | 142.79228   | 0    |
| 6.42861E-06 | 0.063886961 | 7  | -2.490548155 | 0.131109928 | 390.055     | 130.0545045 | 0    |
| 6.45845E-06 | 0.039415139 | 19 | -2.541081406 | 0.094079965 | 511.883     | 159.5622745 | 0    |
| 6.50933E-06 | 0.061705597 | 79 | -2.493064687 | 0.123437591 | 389.011     | 123.4561878 | 0    |
| 6.52081E-06 | 0.179715526 | 95 | -2.052669741 | 0.347732189 | 158.22      | 61.28929742 | 0    |
| 6.61941E-06 | 0.013406386 | 49 | -2.527695803 | 0.076238044 | 840.509     | 207.1711655 | 0    |
| 6.67778E-06 | 0.025203094 | 41 | -2.552025842 | 0.083223018 | 643.11      | 184.4100349 | 0    |
| 6.71129E-06 | 0.184675108 | 81 | -2.033468914 | 0.36471217  | 157.084     | 59.45143747 | 0    |
| 6.74110E-06 | 0.012953563 | 72 | -2.529307254 | 0.078355505 | 870.143     | 224.0870893 | 0    |
| 6.77895E-06 | 0.042308741 | 80 | -2.541125362 | 0.090781076 | 497.057     | 147.9309884 | 0    |
| 6.78473E-06 | 0.180034226 | 47 | -2.037501557 | 0.354121272 | 163.303     | 62.91191541 | 0    |
| 6.80869E-06 | 0.146559555 | 21 | -2.19406396  | 0.284609993 | 122.693     | 45.58109682 | 0    |
| 6.82733E-06 | 0.056909954 | 59 | -2.513305204 | 0.113574939 | 422.41      | 134.0480988 | 0    |
| 6.83593E-06 | 0.076868611 | 49 | -2.442675613 | 0.160653802 | 350.257     | 118.3542592 | 0    |
| 6.84453E-06 | 0.025937913 | 15 | -2.556708238 | 0.078860856 | 644.687     | 193.0205065 | 0    |
| 6.86818E-06 | 0.088019082 | 47 | -2.420797254 | 0.179780326 | 320.616     | 104.4551072 | 0    |
| 6.90801E-06 | 0.007457312 | 75 | -2.48893408  | 0.080148005 | 1048.332    | 239.3597562 | 0    |
| 6.95230E-06 | 0.186057268 | 78 | -2.018813781 | 0.350502131 | 157.646     | 60.18999518 | 0    |
| 6.98195E-06 | 0.150790823 | 8  | -2.173780372 | 0.296051761 | 201.855     | 76.85593542 | 0    |
| 7.01129E-06 | 0.117400419 | 99 | -2.317364359 | 0.223678581 | 260.326     | 92.96620052 | 0    |
| 7.02328E-06 | 0.062670765 | 68 | -2.495649631 | 0.12599538  | 408.589     | 129.633317  | 0    |
| 7.03960E-06 | 0.076898129 | 49 | -2.458608975 | 0.144983134 | 369.077     | 124.3281326 | 0    |
| 7.04110E-06 | 0.02039321  | 27 | -2.551816517 | 0.073694819 | 739.155     | 201.868308  | 0    |
| 7.07798E-06 | 0.09952533  | 11 | -2.367716285 | 0.202708985 | 298.488     | 106.8031028 | 0    |
| 7.16578E-06 | 0.164836135 | 34 | -2.112573648 | 0.324466583 | 189.619     | 73.83079863 | 0    |
| 7.16907E-06 | 0.178343668 | 30 | -2.06332979  | 0.329153933 | 112.1597938 | 39.12594559 | 80.6 |
| 7.17772E-06 | 0.138474662 | 21 | -2.229724935 | 0.26582104  | 230.211     | 79.97094367 | 0    |
| 7.18952E-06 | 0.051417423 | 58 | -2.529305237 | 0.107858519 | 474.913     | 150.5340624 | 0    |
| 7.21034E-06 | 0.131057148 | 41 | -2.263690883 | 0.236809421 | 238.425     | 84.12810418 | 0    |
| 7.21766E-06 | 0.150426253 | 89 | -2.183733977 | 0.30257552  | 210.568     | 80.25684106 | 0    |
| 7.22276E-06 | 0.065801281 | 27 | -2.487010759 | 0.135017996 | 395.223     | 131.0033326 | 0    |
| 7.28827E-06 | 0.054523495 | 28 | -2.512510853 | 0.117947502 | 447.441     | 148.2902712 | 0    |

|             |             |    |              |             |             |             |      |
|-------------|-------------|----|--------------|-------------|-------------|-------------|------|
| 7.34886E-06 | 0.048310702 | 34 | -2.530371191 | 0.106199965 | 494.59      | 158.0397053 | 0    |
| 7.36520E-06 | 0.051301492 | 95 | -2.51914289  | 0.113994345 | 472.227     | 147.7385398 | 0    |
| 7.39311E-06 | 0.048410189 | 44 | -2.543515174 | 0.089002604 | 222.213     | 75.67403908 | 0    |
| 7.39443E-06 | 0.142488828 | 65 | -2.223760785 | 0.272916523 | 228.38      | 82.59871759 | 0    |
| 7.41247E-06 | 0.082466592 | 26 | -2.445896823 | 0.155609023 | 350.58      | 127.4844614 | 0    |
| 7.42439E-06 | 0.138494135 | 4  | -2.226955385 | 0.279720187 | 232.196     | 84.05707094 | 0    |
| 7.50443E-06 | 0.074608316 | 53 | -2.467081169 | 0.144974333 | 380.4653266 | 126.8435385 | 0.5  |
| 7.51767E-06 | 0.137078511 | 72 | -2.245032333 | 0.257150794 | 236.178     | 86.07827708 | 0    |
| 7.59875E-06 | 0.04001344  | 92 | -2.548634304 | 0.094289806 | 549.201     | 174.9091301 | 0    |
| 7.60124E-06 | 0.197655797 | 56 | -1.971468748 | 0.394631373 | 160.586     | 61.63470971 | 0    |
| 7.64061E-06 | 0.075298103 | 79 | -2.459775663 | 0.156429417 | 386.462     | 132.3871252 | 0    |
| 7.68735E-06 | 0.086217638 | 71 | -2.447923552 | 0.143747413 | 179.422     | 63.82486608 | 0    |
| 7.73333E-06 | 0.079299325 | 79 | -2.452550733 | 0.15307327  | 376.58      | 127.8387983 | 0    |
| 7.77212E-06 | 0.196554711 | 63 | -1.984723902 | 0.392655194 | 164.695     | 63.20779382 | 0    |
| 7.80427E-06 | 0.011199664 | 63 | -2.520420468 | 0.077848821 | 966.524     | 235.7493355 | 0    |
| 7.86550E-06 | 0.179721627 | 71 | -2.06962471  | 0.341131207 | 181.521     | 69.42190548 | 0    |
| 7.88451E-06 | 0.080996722 | 35 | -2.449756283 | 0.153657455 | 383.829     | 133.0214662 | 0    |
| 7.88638E-06 | 0.1666448   | 59 | -2.120404744 | 0.322095976 | 201.396     | 75.09448959 | 0    |
| 7.92294E-06 | 0.067269241 | 93 | -2.485810753 | 0.13481249  | 418.795     | 138.7381103 | 0    |
| 7.98441E-06 | 0.061223256 | 13 | -2.506154325 | 0.119019726 | 451.1435794 | 146.2317971 | 1.1  |
| 7.99095E-06 | 0.089447718 | 53 | -2.440670425 | 0.149941216 | 179.837     | 65.68188899 | 0    |
| 7.99285E-06 | 0.050713501 | 97 | -2.534753003 | 0.106458715 | 495.403     | 155.9264623 | 0    |
| 7.99901E-06 | 0.050967349 | 89 | -2.528929069 | 0.103038136 | 497.634     | 154.4307252 | 0    |
| 8.00013E-06 | 0.128142071 | 83 | -2.277511989 | 0.24697584  | 268.947     | 96.30920857 | 0    |
| 8.00249E-06 | 0.11790393  | 55 | -2.322167818 | 0.227962689 | 288.982     | 97.69893939 | 0    |
| 8.00836E-06 | 0.148077971 | 87 | -2.199919025 | 0.284032144 | 136.619     | 48.85972894 | 0    |
| 8.11586E-06 | 0.167457995 | 87 | -2.132365478 | 0.320822963 | 124.238     | 46.64501166 | 0    |
| 8.13033E-06 | 0.021430876 | 75 | -2.551283793 | 0.079865134 | 773.333     | 207.6434538 | 0    |
| 8.17407E-06 | 0.125348653 | 80 | -2.284101759 | 0.239945517 | 276.9866518 | 96.61832147 | 10.1 |
| 8.27083E-06 | 0.074989706 | 45 | -2.464181313 | 0.152911371 | 413.274     | 143.7678619 | 0    |
| 8.29799E-06 | 0.024720669 | 88 | -2.566448744 | 0.079759978 | 719.667     | 211.7515214 | 0    |
| 8.30624E-06 | 0.104965581 | 65 | -2.363483165 | 0.200270093 | 321.74      | 112.5569521 | 0    |
| 8.44438E-06 | 0.186754651 | 80 | -2.018784115 | 0.383265374 | 188.768     | 72.4658366  | 0    |
| 8.46443E-06 | 0.101071854 | 5  | -2.378379641 | 0.2010005   | 335.763     | 113.2412664 | 0    |
| 8.46703E-06 | 0.165195627 | 75 | -2.129612837 | 0.31867126  | 216.681     | 83.37253876 | 0    |
| 8.46893E-06 | 0.032363037 | 37 | -2.55913469  | 0.082819055 | 653.552     | 201.7541525 | 0    |
| 8.49289E-06 | 0.052155964 | 70 | -2.529301194 | 0.10687454  | 511.329     | 168.0613977 | 0    |
| 8.49640E-06 | 0.011483327 | 93 | -2.524171765 | 0.077585068 | 995.999     | 253.6725029 | 0    |
| 8.50168E-06 | 0.157491798 | 58 | -2.150882271 | 0.3135751   | 224.714     | 82.46358255 | 0    |
| 8.59353E-06 | 0.119391729 | 2  | -2.310786869 | 0.233170398 | 301.436     | 110.8122613 | 0    |
| 8.63529E-06 | 0.112601893 | 34 | -2.331966464 | 0.228850405 | 313.448     | 111.5213805 | 0    |
| 8.64280E-06 | 0.128128245 | 19 | -2.258019263 | 0.255049042 | 281.851     | 100.7786641 | 0    |
| 8.72579E-06 | 0.133745637 | 41 | -2.247429925 | 0.277316686 | 270.206     | 100.7595854 | 0    |
| 8.73167E-06 | 0.021543106 | 22 | -2.552923449 | 0.082063861 | 785.933     | 223.020202  | 0    |
| 8.74277E-06 | 0.017176358 | 80 | -2.549018151 | 0.076780648 | 864.539     | 242.7295081 | 0    |
| 8.77671E-06 | 0.116429936 | 1  | -2.323459329 | 0.237454452 | 310.695     | 109.1745715 | 0    |
| 8.79343E-06 | 0.103772443 | 78 | -2.376890594 | 0.188639046 | 335.424     | 119.675923  | 0    |
| 8.80503E-06 | 0.009299307 | 97 | -2.515949453 | 0.075308786 | 1085.272    | 272.3681046 | 0    |
| 8.81455E-06 | 0.039320445 | 79 | -2.555134061 | 0.092649516 | 612.422     | 203.4150181 | 0    |
| 8.84282E-06 | 0.113147577 | 88 | -2.342495118 | 0.20960697  | 319.741     | 108.2580053 | 0    |
| 8.89345E-06 | 0.045187261 | 8  | -2.543956231 | 0.098464532 | 560.6888658 | 173.7109308 | 3.9  |
| 1.01007E-07 | 0.037207555 | 42 | -2.051728712 | 0.197389059 | 21.65       | 8.301229452 | 0    |

|             |             |    |              |             |             |             |      |
|-------------|-------------|----|--------------|-------------|-------------|-------------|------|
| 1.06501E-07 | 0.043483318 | 60 | -2.012139803 | 0.212294591 | 19.3993994  | 7.609036372 | 0.1  |
| 1.11486E-07 | 0.038947139 | 4  | -2.059089214 | 0.203824726 | 22.616      | 8.495217049 | 0    |
| 1.16237E-07 | 0.086858593 | 96 | -1.690919447 | 0.28940054  | 9.419715447 | 4.341671266 | 1.6  |
| 1.30883E-07 | 0.082461751 | 26 | -1.76546852  | 0.281696443 | 11.30251256 | 5.274167687 | 0.5  |
| 1.31513E-07 | 0.169136567 | 32 | -1.235420133 | 0.365639957 | 4.790486976 | 2.412702611 | 11.7 |
| 1.31540E-07 | 0.073409472 | 70 | -1.865148747 | 0.25371201  | 13.37951807 | 5.777146291 | 0.4  |
| 1.31617E-07 | 0.009450759 | 77 | -2.125155336 | 0.185832109 | 76.434      | 19.25191628 | 0    |
| 1.34829E-07 | 0.000769518 | 77 | -1.697173636 | 0.284645295 | 136.115     | 30.2327934  | 0    |
| 1.38570E-07 | 0.084078144 | 44 | -1.780101152 | 0.272122944 | 11.87638191 | 5.493346531 | 0.5  |
| 1.43412E-07 | 0.105046852 | 85 | -1.637557995 | 0.301087978 | 9.364646465 | 4.619753891 | 1    |
| 1.46392E-07 | 0.040145492 | 17 | -2.135284109 | 0.184647437 | 28.418      | 10.39332946 | 0    |
| 1.48040E-07 | 0.005775423 | 78 | -2.098596342 | 0.182797238 | 98.163      | 24.08057942 | 0    |
| 1.51325E-07 | 0.105622891 | 79 | -1.670288298 | 0.312594453 | 9.773373984 | 4.550212945 | 1.6  |
| 1.53729E-07 | 0.034102996 | 71 | -2.178654623 | 0.172540664 | 34.491      | 11.81259736 | 0    |
| 1.55198E-07 | 0.032455678 | 97 | -2.191126512 | 0.173775225 | 37.506      | 12.53375678 | 0    |
| 1.56929E-07 | 0.057293669 | 13 | -2.042616833 | 0.20408599  | 20.968      | 8.100283365 | 0    |
| 1.58551E-07 | 0.090848716 | 65 | -1.769475169 | 0.281742653 | 12.20523139 | 5.734485422 | 0.6  |
| 1.59398E-07 | 0.140382942 | 9  | -1.456672525 | 0.367980397 | 7.033057851 | 3.521384245 | 3.2  |
| 1.61103E-07 | 0.070249371 | 69 | -1.936668307 | 0.248297836 | 17.00801603 | 7.294076125 | 0.2  |
| 1.61814E-07 | 0.147711891 | 83 | -1.431511401 | 0.330481489 | 6.719334719 | 3.289408534 | 3.8  |
| 1.64562E-07 | 0.034303216 | 59 | -2.204674548 | 0.164424981 | 37.408      | 12.50815694 | 0    |
| 1.64607E-07 | 0.04166588  | 29 | -2.148898671 | 0.186285207 | 30.243      | 10.84147077 | 0    |
| 1.67115E-07 | 0.042028676 | 83 | -2.158735481 | 0.171895398 | 30.332      | 11.00776757 | 0    |
| 1.72210E-07 | 0.160113083 | 69 | -1.396790625 | 0.351619853 | 6.412147505 | 3.224058574 | 7.8  |
| 1.75415E-07 | 0.104000951 | 12 | -1.740389559 | 0.287249414 | 11.67507568 | 5.48417138  | 0.9  |
| 1.81932E-07 | 0.14681816  | 88 | -1.461909975 | 0.35936019  | 7.61761658  | 3.760172995 | 3.5  |
| 1.83192E-07 | 0.021043343 | 23 | -2.251400713 | 0.149714884 | 60.754      | 17.8018648  | 0    |
| 1.88713E-07 | 0.156515898 | 48 | -1.392182677 | 0.381506499 | 7.013569937 | 3.69342713  | 4.2  |
| 1.90009E-07 | 0.021541516 | 89 | -2.248712907 | 0.155683169 | 59.158      | 17.47599629 | 0    |
| 1.91987E-07 | 0.010356717 | 30 | -2.202204033 | 0.168264635 | 97.794      | 24.93181019 | 0    |
| 1.93567E-07 | 0.020632953 | 51 | -2.252492364 | 0.155272094 | 63.037      | 18.30378812 | 0    |
| 2.03309E-07 | 0.157051872 | 34 | -1.456888632 | 0.381325772 | 7.923879041 | 4.091776361 | 4.1  |
| 2.18721E-07 | 0.086025658 | 74 | -1.924202682 | 0.263315314 | 17.60760761 | 7.361151764 | 0.1  |
| 2.19485E-07 | 0.032888251 | 27 | -2.256192839 | 0.153005715 | 49.268      | 15.75983974 | 0    |
| 2.19679E-07 | 0.154142694 | 77 | -1.495808435 | 0.371576186 | 8.616803279 | 4.153797697 | 2.4  |
| 2.22485E-07 | 0.126848726 | 43 | -1.647251953 | 0.32377229  | 10.78947368 | 5.211262308 | 1.2  |
| 2.25032E-07 | 0.155844325 | 48 | -1.480786984 | 0.373873978 | 8.399795501 | 4.352986946 | 2.2  |
| 2.29831E-07 | 0.030077451 | 71 | -2.27335215  | 0.143059314 | 55.338      | 18.12904902 | 0    |
| 2.31006E-07 | 0.016107215 | 84 | -2.263564921 | 0.153668533 | 84.815      | 22.90955309 | 0    |
| 2.42615E-07 | 0.094599317 | 40 | -1.899536017 | 0.269312799 | 17.18336673 | 7.410681378 | 0.2  |
| 2.44791E-07 | 0.024944146 | 43 | -2.286677176 | 0.146057109 | 68.256      | 21.01609241 | 0    |
| 2.45494E-07 | 0.029922845 | 11 | -2.284437618 | 0.152107372 | 58.574      | 18.39992068 | 0    |
| 2.48791E-07 | 0.157492765 | 73 | -1.527458089 | 0.351890945 | 9.229441624 | 4.561475544 | 1.5  |
| 2.52080E-07 | 0.193546788 | 21 | -1.31359069  | 0.38831406  | 7.111461619 | 3.590365041 | 4.9  |
| 2.54351E-07 | 0.032071962 | 69 | -2.281012588 | 0.151163693 | 56.094      | 18.23056547 | 0    |
| 2.55051E-07 | 0.115715145 | 62 | -1.808019754 | 0.283378053 | 14.54929577 | 6.527043788 | 0.6  |
| 2.56097E-07 | 0.068202216 | 46 | -2.099016583 | 0.221928491 | 27.858      | 11.27656849 | 0    |
| 2.57110E-07 | 0.130054995 | 61 | -1.693241351 | 0.337814069 | 12.3919598  | 5.889930677 | 0.5  |
| 2.60855E-07 | 0.134972889 | 90 | -1.676219507 | 0.334868692 | 11.80524723 | 5.582205921 | 0.9  |
| 2.65494E-07 | 0.159940203 | 68 | -1.522496241 | 0.359625464 | 9.347560976 | 4.465207894 | 1.6  |
| 2.66887E-07 | 0.137423897 | 27 | -1.656033391 | 0.335390019 | 11.62273642 | 5.640231523 | 0.6  |
| 2.67293E-07 | 0.178332191 | 26 | -1.429277855 | 0.390284363 | 8.269270298 | 4.152624633 | 2.7  |

|             |             |    |              |             |             |             |     |
|-------------|-------------|----|--------------|-------------|-------------|-------------|-----|
| 2.67657E-07 | 0.01171703  | 22 | -2.26184749  | 0.151632922 | 115.415     | 29.1269833  | 0   |
| 2.77101E-07 | 0.089815698 | 84 | -1.97863907  | 0.262622641 | 21.281      | 8.637629747 | 0   |
| 2.84542E-07 | 0.159657855 | 67 | -1.551669886 | 0.360559259 | 10.24696356 | 4.913614534 | 1.2 |
| 2.86705E-07 | 0.076434857 | 35 | -2.080676078 | 0.217220878 | 27.147      | 10.96565715 | 0   |
| 2.95952E-07 | 0.009966019 | 61 | -2.262246359 | 0.151047832 | 135.232     | 32.51974338 | 0   |
| 2.98885E-07 | 0.121334637 | 44 | -1.800200899 | 0.322363033 | 15.65295888 | 6.952934414 | 0.3 |
| 3.00067E-07 | 0.194122681 | 2  | -1.381106528 | 0.400836709 | 8.141675284 | 4.106449818 | 3.3 |
| 3.02974E-07 | 0.089504202 | 68 | -2.002698716 | 0.24189679  | 23.6        | 9.763879011 | 0   |
| 3.20559E-07 | 0.088571362 | 72 | -2.015069109 | 0.256241002 | 24.705      | 10.17799423 | 0   |
| 3.22863E-07 | 0.097689633 | 25 | -1.993466538 | 0.243670378 | 22.576      | 9.420348559 | 0   |
| 3.26118E-07 | 0.036476882 | 14 | -2.303960911 | 0.146584594 | 62.736      | 21.17547413 | 0   |
| 3.27505E-07 | 0.005282555 | 41 | -2.179380302 | 0.166583287 | 186.832     | 40.77330301 | 0   |
| 3.29323E-07 | 0.050551651 | 60 | -2.253900919 | 0.177992937 | 46.379      | 16.37392636 | 0   |
| 3.29820E-07 | 0.067238279 | 28 | -2.163622197 | 0.191617613 | 34.587      | 12.93598743 | 0   |
| 3.30007E-07 | 0.156793492 | 89 | -1.617907817 | 0.357900941 | 11.94869215 | 5.81767139  | 0.6 |
| 3.35742E-07 | 0.167702541 | 54 | -1.548066791 | 0.381756124 | 10.81010101 | 5.146027259 | 1   |
| 3.41295E-07 | 0.173539696 | 52 | -1.533585629 | 0.380551779 | 10.71890799 | 5.294739619 | 1.1 |
| 3.42671E-07 | 0.082308406 | 83 | -2.089385281 | 0.218527615 | 28.736      | 11.30673013 | 0   |
| 3.42882E-07 | 0.07431508  | 8  | -2.121981096 | 0.225706387 | 32.72       | 12.81154697 | 0   |
| 3.45360E-07 | 0.042748883 | 49 | -2.288643438 | 0.158097015 | 56.221      | 19.0995013  | 0   |
| 3.58661E-07 | 0.07559624  | 28 | -2.134153711 | 0.208705032 | 33.103      | 13.04954718 | 0   |
| 3.59921E-07 | 0.125055574 | 99 | -1.829067947 | 0.310160581 | 17.93881645 | 7.852765852 | 0.3 |
| 3.61200E-07 | 0.166728483 | 96 | -1.59625845  | 0.370273383 | 12.28830645 | 5.890828558 | 0.8 |
| 3.61990E-07 | 0.115642209 | 19 | -1.894221514 | 0.304138975 | 19.73073073 | 8.826686091 | 0.1 |
| 3.67849E-07 | 0.088095933 | 67 | -2.072838478 | 0.234517588 | 28.558      | 10.95968753 | 0   |
| 3.71272E-07 | 0.180958839 | 47 | -1.509631867 | 0.405640517 | 11.18705763 | 5.698781241 | 1.1 |
| 3.71916E-07 | 0.185370158 | 53 | -1.470742075 | 0.395973823 | 10.56275304 | 5.375005885 | 1.2 |
| 3.75708E-07 | 0.059146015 | 60 | -2.242430884 | 0.17534194  | 45.729      | 16.15718458 | 0   |
| 3.79205E-07 | 0.126706296 | 27 | -1.841558912 | 0.298893032 | 18.514      | 7.936043396 | 0   |
| 3.81526E-07 | 0.012531531 | 55 | -2.309963075 | 0.145753473 | 143.198     | 36.64332858 | 0   |
| 3.81531E-07 | 0.184663853 | 87 | -1.482191711 | 0.425535539 | 10.89292929 | 5.422181394 | 1   |
| 3.84650E-07 | 0.035590645 | 80 | -2.327969953 | 0.151926452 | 72.516      | 22.81864226 | 0   |
| 3.85416E-07 | 0.175953718 | 53 | -1.563247984 | 0.378332212 | 11.71039354 | 5.718645999 | 0.9 |
| 3.86830E-07 | 0.106141973 | 46 | -1.974307014 | 0.262384794 | 23.65       | 9.968092238 | 0   |
| 3.88749E-07 | 0.079953214 | 58 | -2.147676944 | 0.205784745 | 33.827      | 13.18950469 | 0   |
| 3.88788E-07 | 0.04436575  | 64 | -2.310322328 | 0.154710767 | 61.693      | 20.85727156 | 0   |
| 3.90501E-07 | 0.058404112 | 96 | -2.240043769 | 0.172156923 | 47.056      | 17.70271872 | 0   |
| 3.91166E-07 | 0.138171295 | 90 | -1.790899531 | 0.327033394 | 17.18336673 | 7.311759663 | 0.2 |
| 3.92821E-07 | 0.003985377 | 82 | -2.168462609 | 0.162018642 | 224.207     | 47.82461024 | 0   |
| 3.93391E-07 | 0.041200387 | 66 | -2.312058383 | 0.156169676 | 66.356      | 21.61935847 | 0   |
| 4.02929E-07 | 0.169936849 | 3  | -1.603446846 | 0.381425273 | 13.05236657 | 6.586679873 | 0.7 |
| 4.11887E-07 | 0.06560143  | 87 | -2.215498124 | 0.188134209 | 43.547      | 16.05270944 | 0   |
| 4.14708E-07 | 0.110029495 | 25 | -1.959219285 | 0.266771854 | 23.897      | 10.10467691 | 0   |
| 4.18398E-07 | 0.171023922 | 9  | -1.628216432 | 0.35684027  | 13.5427996  | 6.409924184 | 0.7 |
| 4.20551E-07 | 0.090051366 | 33 | -2.096146008 | 0.224228824 | 31.441      | 12.4585607  | 0   |
| 4.25340E-07 | 0.137870962 | 64 | -1.812475466 | 0.31592473  | 18.34068136 | 8.114536675 | 0.2 |
| 4.26358E-07 | 0.166239545 | 10 | -1.662961204 | 0.374864082 | 14.6252505  | 6.943376348 | 0.2 |
| 4.28101E-07 | 0.158786361 | 54 | -1.70345215  | 0.351579083 | 15.60621242 | 7.121825798 | 0.2 |
| 4.30122E-07 | 0.141437011 | 3  | -1.781114828 | 0.325992818 | 17.60140562 | 7.776058995 | 0.4 |
| 4.34453E-07 | 0.18849351  | 70 | -1.524455338 | 0.407446459 | 11.95766129 | 5.741155772 | 0.8 |
| 4.42454E-07 | 0.017329756 | 89 | -2.347727504 | 0.132725352 | 136.154     | 36.57126935 | 0   |
| 4.44893E-07 | 0.169470657 | 8  | -1.641322354 | 0.354117793 | 14.17570281 | 6.560752194 | 0.4 |

|             |             |    |              |             |             |             |     |
|-------------|-------------|----|--------------|-------------|-------------|-------------|-----|
| 4.48038E-07 | 0.004796206 | 91 | -2.212677756 | 0.159731975 | 231.579     | 51.24767393 | 0   |
| 4.52654E-07 | 0.186283576 | 46 | -1.552785915 | 0.393812293 | 12.62825651 | 6.178479099 | 0.2 |
| 4.56315E-07 | 0.181095092 | 36 | -1.590898111 | 0.399559542 | 13.17771084 | 6.001804183 | 0.4 |
| 4.56356E-07 | 0.199225753 | 72 | -1.476786266 | 0.423571001 | 11.66565962 | 5.78452111  | 0.7 |
| 4.57230E-07 | 0.151610343 | 43 | -1.732066618 | 0.384118326 | 17.00900901 | 7.852403415 | 0.1 |
| 4.57358E-07 | 0.187871408 | 27 | -1.534098368 | 0.422468046 | 12.70251256 | 6.327413428 | 0.5 |
| 4.58596E-07 | 0.116048413 | 48 | -1.961712174 | 0.280322732 | 25.57057057 | 10.3504124  | 0.1 |
| 4.59638E-07 | 0.053993528 | 73 | -2.300837062 | 0.154081865 | 59.535      | 20.63842823 | 0   |
| 4.65103E-07 | 0.116094108 | 28 | -1.962340759 | 0.291183615 | 25.40280561 | 10.54103469 | 0.2 |
| 4.66800E-07 | 0.161534222 | 85 | -1.695431883 | 0.380400702 | 16.03106212 | 7.387133836 | 0.2 |
| 4.72373E-07 | 0.105331015 | 61 | -2.04391141  | 0.258162119 | 29.021      | 11.77017825 | 0   |
| 4.73611E-07 | 0.013217151 | 99 | -2.338045263 | 0.130808871 | 167.561     | 42.67612366 | 0   |
| 4.74453E-07 | 0.075842681 | 41 | -2.201958167 | 0.183824769 | 41.642      | 15.26974135 | 0   |
| 4.76678E-07 | 1.81E-05    | 80 | -0.828796119 | 0.473864262 | 627.398     | 139.04378   | 0   |
| 4.78537E-07 | 0.179169857 | 19 | -1.606507287 | 0.406218549 | 14.59337349 | 6.715489952 | 0.4 |
| 4.81157E-07 | 0.160491168 | 58 | -1.72225111  | 0.350772212 | 16.67667668 | 7.844465427 | 0.1 |
| 4.85082E-07 | 0.137902666 | 4  | -1.857548224 | 0.324507283 | 20.85785786 | 9.237992033 | 0.1 |
| 4.85231E-07 | 0.183335963 | 55 | -1.609872234 | 0.373760088 | 14.39034205 | 6.840032868 | 0.6 |
| 4.86011E-07 | 0.131413846 | 12 | -1.881475385 | 0.307215953 | 22.098      | 9.195812034 | 0   |
| 4.86422E-07 | 0.022695217 | 3  | -2.373722617 | 0.125346109 | 123.777     | 35.01578753 | 0   |
| 4.87254E-07 | 0.01990165  | 26 | -2.36873971  | 0.123626619 | 134.026     | 38.07943497 | 0   |
| 4.89744E-07 | 0.098521639 | 81 | -2.077731826 | 0.223896387 | 31.116      | 12.53098438 | 0   |
| 4.92587E-07 | 0.198861697 | 51 | -1.479313208 | 0.433173479 | 12.18932528 | 5.880737319 | 0.7 |
| 4.93722E-07 | 0.04876874  | 3  | -2.325216077 | 0.153559391 | 69.615      | 24.17443232 | 0   |
| 4.99492E-07 | 0.158744752 | 85 | -1.723296886 | 0.371951938 | 17.81024096 | 7.74136806  | 0.4 |
| 5.07314E-07 | 0.12820882  | 74 | -1.93328967  | 0.278126762 | 23.854      | 9.985910194 | 0   |
| 5.08780E-07 | 0.172074038 | 94 | -1.68434778  | 0.381311733 | 16.54964895 | 7.634522652 | 0.3 |
| 5.09719E-07 | 0.002444161 | 36 | -2.099328143 | 0.158381459 | 305.533     | 62.92273183 | 0   |
| 5.10720E-07 | 0.187349958 | 84 | -1.584976378 | 0.400536473 | 14.19539078 | 6.911889862 | 0.2 |
| 5.12413E-07 | 0.014328371 | 75 | -2.353418201 | 0.129180266 | 167.381     | 43.14941148 | 0   |
| 5.22986E-07 | 0.027897215 | 39 | -2.376066156 | 0.128146985 | 113.429     | 32.94559715 | 0   |
| 5.26933E-07 | 0.018889169 | 53 | -2.374738531 | 0.129071437 | 147.882     | 39.6916049  | 0   |
| 5.30076E-07 | 0.086444759 | 47 | -2.170540461 | 0.210112043 | 41.69       | 15.81385399 | 0   |
| 5.31326E-07 | 0.092535834 | 63 | -2.119109716 | 0.239276734 | 37.306      | 14.97606913 | 0   |
| 5.41062E-07 | 0.142412853 | 61 | -1.854984828 | 0.323955412 | 22.439      | 9.4031217   | 0   |
| 5.41403E-07 | 0.098318418 | 61 | -2.117486568 | 0.220078354 | 36.471      | 13.97671304 | 0   |
| 5.45228E-07 | 0.071245859 | 56 | -2.241210892 | 0.187757874 | 50.269      | 18.60469763 | 0   |
| 5.46210E-07 | 0.089440989 | 94 | -2.161198011 | 0.211059968 | 40.233      | 14.83964036 | 0   |
| 5.47140E-07 | 0.18887474  | 83 | -1.591718244 | 0.40295329  | 15.03614458 | 6.949256046 | 0.4 |
| 5.50747E-07 | 0.092513615 | 87 | -2.132668265 | 0.227529601 | 38.957      | 15.1101114  | 0   |
| 5.55891E-07 | 0.041245357 | 79 | -2.358015556 | 0.140884001 | 87.064      | 28.91944395 | 0   |
| 5.62946E-07 | 0.127920307 | 1  | -1.935608969 | 0.301668399 | 26.14414414 | 10.81272738 | 0.1 |
| 5.63912E-07 | 0.061802322 | 41 | -2.286673673 | 0.176634746 | 61.096      | 21.66772425 | 0   |
| 5.67740E-07 | 0.073935846 | 64 | -2.241936708 | 0.17885454  | 50.633      | 18.87311595 | 0   |
| 5.73891E-07 | 0.036132675 | 51 | -2.381969483 | 0.127099659 | 100.507     | 31.59592147 | 0   |
| 5.76137E-07 | 0.093415537 | 69 | -2.135582306 | 0.233306332 | 40.19       | 15.81980297 | 0   |
| 5.77759E-07 | 0.136922281 | 1  | -1.891555179 | 0.317840469 | 25.21021021 | 10.53754885 | 0.1 |
| 5.83091E-07 | 0.118965916 | 71 | -2.009976284 | 0.275477983 | 30.95       | 12.67636345 | 0   |
| 5.86024E-07 | 0.042663324 | 28 | -2.365750061 | 0.144936209 | 91.262      | 29.73596448 | 0   |
| 5.87869E-07 | 0.068704733 | 30 | -2.268775213 | 0.174609937 | 56.323      | 20.37085277 | 0   |
| 5.88930E-07 | 0.151381812 | 81 | -1.835404395 | 0.321817992 | 22.28928929 | 9.451245817 | 0.1 |
| 5.89784E-07 | 0.121789582 | 5  | -1.985400331 | 0.287559606 | 29.799      | 11.78386433 | 0   |

|             |             |    |              |             |             |             |     |
|-------------|-------------|----|--------------|-------------|-------------|-------------|-----|
| 5.92252E-07 | 0.012728503 | 89 | -2.365315467 | 0.126212424 | 195.285     | 48.73625958 | 0   |
| 5.97764E-07 | 0.061090506 | 26 | -2.300659524 | 0.164891714 | 64.284      | 22.72980396 | 0   |
| 6.07912E-07 | 0.064251841 | 3  | -2.292260897 | 0.170357909 | 63.575      | 23.29611736 | 0   |
| 6.10206E-07 | 0.188284389 | 45 | -1.627234139 | 0.419554958 | 16.91291291 | 7.974874335 | 0.1 |
| 6.11120E-07 | 0.133549017 | 28 | -1.934261205 | 0.301857247 | 27.205      | 11.16170052 | 0   |
| 6.22853E-07 | 0.161318926 | 63 | -1.786585267 | 0.359595657 | 21.63563564 | 9.413852166 | 0.1 |
| 6.25570E-07 | 0.105957438 | 85 | -2.08558759  | 0.258754248 | 37.698      | 15.06823971 | 0   |
| 6.27399E-07 | 0.021757202 | 56 | -2.39269476  | 0.124485746 | 150.373     | 41.96442403 | 0   |
| 6.29198E-07 | 0.068921262 | 90 | -2.268622756 | 0.182335149 | 59.777      | 21.2884586  | 0   |
| 6.31635E-07 | 0.10812276  | 39 | -2.074949967 | 0.271997634 | 37.18018018 | 14.75027827 | 0.1 |
| 6.32878E-07 | 0.126549014 | 23 | -1.967960893 | 0.29350933  | 29.778      | 12.50388192 | 0   |
| 6.33823E-07 | 0.178907936 | 73 | -1.671331584 | 0.389386425 | 18.62725451 | 8.126466455 | 0.2 |
| 6.34670E-07 | 0.154019599 | 35 | -1.821776121 | 0.367887564 | 23.32       | 10.25567057 | 0   |
| 6.41006E-07 | 0.003459179 | 72 | -2.195076763 | 0.160541996 | 332.256     | 69.47318178 | 0   |
| 6.46468E-07 | 0.185159712 | 30 | -1.67006804  | 0.386386813 | 18.021      | 8.141058643 | 0   |
| 6.48995E-07 | 0.073932404 | 98 | -2.257821508 | 0.188034544 | 57.549      | 21.1703515  | 0   |
| 6.49178E-07 | 0.005010425 | 31 | -2.26484028  | 0.133943974 | 298.541     | 65.20969731 | 0   |
| 6.49894E-07 | 0.11317488  | 43 | -2.057983013 | 0.253372833 | 35.365      | 14.2420016  | 0   |
| 6.51568E-07 | 0.063328497 | 14 | -2.306086825 | 0.170116923 | 68.583      | 24.40845927 | 0   |
| 6.54198E-07 | 0.174952414 | 5  | -1.735161693 | 0.36212374  | 19.96693387 | 9.099136865 | 0.2 |
| 6.56364E-07 | 0.06533232  | 43 | -2.309508619 | 0.163992778 | 66.057      | 22.59646767 | 0   |
| 6.56444E-07 | 0.12333492  | 71 | -2.010133434 | 0.259923441 | 32.09309309 | 13.0049452  | 0.1 |
| 6.57346E-07 | 0.056927165 | 57 | -2.33082492  | 0.157865604 | 74.947      | 26.47869544 | 0   |
| 6.63547E-07 | 0.027365637 | 8  | -2.395972024 | 0.129348737 | 137.284     | 40.18300658 | 0   |
| 6.73692E-07 | 0.067769351 | 19 | -2.282983501 | 0.176197349 | 64.356      | 22.75044718 | 0   |
| 6.74776E-07 | 0.196447317 | 43 | -1.613491562 | 0.40610367  | 17.39418255 | 8.310012726 | 0.3 |
| 6.78815E-07 | 0.17252288  | 2  | -1.739164739 | 0.386092426 | 20.58458458 | 8.968359133 | 0.1 |
| 6.90168E-07 | 0.065720653 | 72 | -2.303813215 | 0.185377957 | 68.618      | 24.48807346 | 0   |
| 6.93034E-07 | 0.172551217 | 87 | -1.726582668 | 0.414998201 | 21.269      | 9.367517782 | 0   |
| 7.00209E-07 | 0.112848824 | 13 | -2.072358438 | 0.262180829 | 38.486      | 15.41484419 | 0   |
| 7.09381E-07 | 0.160081838 | 6  | -1.815992771 | 0.367069638 | 24.058      | 10.77073092 | 0   |
| 7.15598E-07 | 0.165907051 | 83 | -1.796755044 | 0.35085572  | 23.47895792 | 10.46928248 | 0.2 |
| 7.18303E-07 | 0.172914761 | 12 | -1.752973161 | 0.37337729  | 22.842      | 10.02544491 | 0   |
| 7.23038E-07 | 0.04067889  | 20 | -2.399535512 | 0.134623914 | 109.438     | 35.41327797 | 0   |
| 7.23864E-07 | 0.03023938  | 10 | -2.413917369 | 0.122199938 | 139.245     | 40.93830627 | 0   |
| 7.27150E-07 | 0.068464767 | 65 | -2.305793295 | 0.173574978 | 68.654      | 24.55596219 | 0   |
| 7.28669E-07 | 0.170839024 | 21 | -1.782422594 | 0.346860099 | 22.904      | 10.1905167  | 0   |
| 7.32970E-07 | 0.029525725 | 27 | -2.411539847 | 0.123930862 | 140.514     | 41.50091722 | 0   |
| 7.35494E-07 | 0.109352402 | 57 | -2.129564421 | 0.262158095 | 42.374      | 16.45627336 | 0   |
| 7.37999E-07 | 0.064538844 | 81 | -2.312447822 | 0.166700053 | 74.775      | 26.43901277 | 0   |
| 7.38471E-07 | 0.08708861  | 88 | -2.217086612 | 0.20560124  | 53.985      | 20.49851126 | 0   |
| 7.40200E-07 | 0.007122198 | 86 | -2.31763108  | 0.131482564 | 287.851     | 66.02461699 | 0   |
| 7.43858E-07 | 0.11097448  | 35 | -2.093753998 | 0.262317469 | 40.736      | 16.4614484  | 0   |
| 7.45283E-07 | 0.170784282 | 98 | -1.769886522 | 0.3851698   | 23.35535536 | 9.907834234 | 0.1 |
| 7.45887E-07 | 0.133740643 | 95 | -1.963543268 | 0.307146824 | 32.626      | 13.65622996 | 0   |
| 7.46177E-07 | 0.11206069  | 49 | -2.089201067 | 0.270413636 | 40.621      | 16.06497564 | 0   |
| 7.48587E-07 | 0.186016318 | 11 | -1.686835983 | 0.397049695 | 20.669      | 9.039311265 | 0   |
| 7.54685E-07 | 0.050743669 | 12 | -2.368816153 | 0.143035592 | 94.978      | 31.31974525 | 0   |
| 7.56554E-07 | 0.083511943 | 5  | -2.225624981 | 0.214401708 | 58.178      | 21.59436576 | 0   |
| 7.57696E-07 | 0.118715895 | 99 | -2.052701247 | 0.273423057 | 37.426      | 14.9596228  | 0   |
| 7.66015E-07 | 0.103301166 | 9  | -2.142747128 | 0.236139051 | 46.152      | 17.97325607 | 0   |
| 7.67139E-07 | 0.122464078 | 44 | -2.039258757 | 0.295693826 | 38.223      | 15.98138529 | 0   |

|             |             |    |              |             |             |             |      |
|-------------|-------------|----|--------------|-------------|-------------|-------------|------|
| 7.70460E-07 | 0.124639136 | 50 | -2.020184672 | 0.289891967 | 36.467      | 14.2701278  | 0    |
| 7.73181E-07 | 0.109563451 | 56 | -2.124596041 | 0.265118401 | 43.723      | 16.6645125  | 0    |
| 7.73734E-07 | 0.124131001 | 5  | -2.039788628 | 0.275645329 | 37.339      | 14.8165316  | 0    |
| 7.78532E-07 | 0.157891765 | 88 | -1.866056127 | 0.31694272  | 27.212      | 11.84699993 | 0    |
| 7.81036E-07 | 0.113441656 | 88 | -2.104894273 | 0.242571695 | 42.251      | 17.24341423 | 0    |
| 7.83887E-07 | 0.071466447 | 8  | -2.300577909 | 0.174653556 | 70.637      | 25.09424141 | 0    |
| 7.87408E-07 | 0.186779623 | 60 | -1.687090532 | 0.417185199 | 21.37037037 | 9.599858203 | 0.1  |
| 7.88540E-07 | 0.119359156 | 87 | -2.073129193 | 0.268431024 | 40.545      | 16.40503277 | 0    |
| 7.91644E-07 | 0.165678778 | 3  | -1.809017429 | 0.369616887 | 26.101      | 11.59565687 | 0    |
| 7.91907E-07 | 0.009790842 | 64 | -2.362107843 | 0.122243822 | 263.733     | 62.03558757 | 0    |
| 7.95075E-07 | 0.056661637 | 65 | -2.359263741 | 0.147817899 | 88.329      | 30.44167299 | 0    |
| 8.02179E-07 | 0.118936536 | 93 | -2.065181003 | 0.277919237 | 40.489      | 16.40405352 | 0    |
| 8.03831E-07 | 0.037715098 | 27 | -2.408939246 | 0.126806834 | 124.749     | 38.86672898 | 0    |
| 8.03971E-07 | 0.126911162 | 96 | -2.038649188 | 0.293079635 | 37.673      | 14.9958977  | 0    |
| 8.11561E-07 | 0.057371531 | 47 | -2.359531602 | 0.157725104 | 90.97       | 30.8348486  | 0    |
| 8.23590E-07 | 0.047100156 | 17 | -2.392813941 | 0.136277983 | 110.282     | 34.90161312 | 0    |
| 8.24378E-07 | 0.126318938 | 38 | -2.04625646  | 0.276387324 | 38.651      | 15.02027988 | 0    |
| 8.26177E-07 | 0.119302398 | 1  | -2.073597824 | 0.274128725 | 41.908      | 16.18287433 | 0    |
| 8.31952E-07 | 0.146472046 | 42 | -1.952159634 | 0.307756778 | 32.588      | 14.11082462 | 0    |
| 8.33841E-07 | 0.096896669 | 78 | -2.202043903 | 0.214839821 | 54.368      | 20.76935102 | 0    |
| 8.38476E-07 | 0.002551945 | 68 | -2.226928671 | 0.141982707 | 390.475     | 83.64899599 | 0    |
| 8.42650E-07 | 0.127731742 | 62 | -2.035720753 | 0.29161473  | 38.438      | 15.94115041 | 0    |
| 8.42714E-07 | 0.001324957 | 32 | -2.079184    | 0.160879099 | 458.899     | 98.29746279 | 0    |
| 8.43452E-07 | 0.09768117  | 61 | -2.173849678 | 0.233342268 | 53.819      | 20.21323363 | 0    |
| 8.43739E-07 | 0.067761497 | 6  | -2.32000126  | 0.176019352 | 78.947      | 28.20400072 | 0    |
| 8.45572E-07 | 0.096051999 | 25 | -2.178944854 | 0.231792045 | 54.742      | 21.13433453 | 0    |
| 8.45649E-07 | 0.183461131 | 6  | -1.729375924 | 0.383622783 | 24.14714715 | 10.73796896 | 0.1  |
| 8.46633E-07 | 0.087285589 | 4  | -2.223955615 | 0.221679003 | 59.829      | 22.29041547 | 0    |
| 8.47860E-07 | 0.10837639  | 53 | -2.122915155 | 0.251857677 | 48.35       | 18.69521359 | 0    |
| 8.50572E-07 | 0.151922227 | 37 | -1.892116848 | 0.340573934 | 31.512      | 13.80660996 | 0    |
| 8.58158E-07 | 0.041572711 | 27 | -2.412564388 | 0.13991195  | 122.952     | 37.92827771 | 0    |
| 8.60427E-07 | 0.076306496 | 11 | -2.29049708  | 0.179318653 | 70.689      | 24.50376938 | 0    |
| 8.63109E-07 | 0.018727661 | 82 | -2.41929724  | 0.11599439  | 209.869     | 57.66908672 | 0    |
| 8.67748E-07 | 0.013888134 | 43 | -2.400844977 | 0.118750513 | 242.481     | 59.70387082 | 0    |
| 8.72738E-07 | 0.151899147 | 57 | -1.908351221 | 0.333381894 | 32.321      | 13.70298255 | 0    |
| 8.79088E-07 | 0.188572366 | 20 | -1.731098666 | 0.392420045 | 23.61661662 | 10.46514226 | 0.1  |
| 8.90965E-07 | 0.076500045 | 30 | -2.279598181 | 0.19632722  | 72.923      | 26.49900504 | 0    |
| 8.93050E-07 | 0.189576839 | 94 | -1.721203809 | 0.426115355 | 23.83       | 10.84853865 | 0    |
| 8.94638E-07 | 0.088764927 | 77 | -2.229402964 | 0.213832092 | 61.753      | 23.17703963 | 0    |
| 8.95009E-07 | 0.168161572 | 30 | -1.821728785 | 0.354682282 | 28.7987988  | 12.21896742 | 0.1  |
| 8.95196E-07 | 0.071280684 | 69 | -2.31169661  | 0.168400319 | 79.715      | 27.37299867 | 0    |
| 1.02549E-08 | 0.166621462 | 95 | -0.927770559 | 0.303715992 | 2.095238095 | 0.297101757 | 95.8 |
| 1.06950E-08 | 0.040927772 | 48 | -1.258643589 | 0.237590368 | 3.196638655 | 1.430778365 | 40.5 |
| 1.08510E-08 | 0.044886013 | 80 | -1.257029637 | 0.211540237 | 3.107407407 | 1.239254646 | 46   |
| 1.10037E-08 | 0.027449551 | 44 | -1.349544288 | 0.264949911 | 4.158653846 | 2.006325044 | 16.8 |
| 1.10591E-08 | 0.18920789  | 62 | -0.989228572 | 0.329183214 | 2.136363636 | 0.408679615 | 95.6 |
| 1.13372E-08 | 0.071016741 | 54 | -1.176759065 | 0.19201822  | 2.513368984 | 0.791091748 | 62.6 |
| 1.13524E-08 | 0.100426938 | 67 | -1.116350232 | 0.214595091 | 2.381188119 | 0.682578207 | 79.8 |
| 1.18474E-08 | 0.186101365 | 97 | -0.938338761 | 0.276544438 | 2.055555556 | 0.231212282 | 94.6 |
| 1.19672E-08 | 0.025621418 | 80 | -1.374937961 | 0.260214865 | 4.498281787 | 2.085953301 | 12.7 |
| 1.31692E-08 | 0.019304788 | 75 | -1.47088918  | 0.276639827 | 6.058762887 | 2.82982248  | 3    |
| 1.37567E-08 | 0.191421556 | 45 | -0.891193972 | 0.327302406 | 2.229508197 | 0.588598409 | 93.9 |



|             |             |    |              |             |             |             |      |
|-------------|-------------|----|--------------|-------------|-------------|-------------|------|
| 1.38273E-08 | 0.002268162 | 93 | -1.232773757 | 0.461863392 | 19.673      | 6.084002473 | 0    |
| 1.38322E-08 | 0.004473975 | 55 | -1.398755614 | 0.367019519 | 15.665      | 5.113210334 | 0    |
| 1.39104E-08 | 0.097980034 | 45 | -1.135839726 | 0.220761062 | 2.526717557 | 0.725329829 | 73.8 |
| 1.42461E-08 | 0.157215948 | 94 | -0.955310389 | 0.294724987 | 2.2         | 0.447213595 | 89.5 |
| 1.49193E-08 | 0.032895211 | 3  | -1.393375055 | 0.259908002 | 4.393764434 | 2.127368134 | 13.4 |
| 1.50476E-08 | 0.174141262 | 35 | -1.00275352  | 0.235382276 | 2.295238095 | 0.517460692 | 89.5 |
| 1.51772E-08 | 0.178423798 | 65 | -0.950406587 | 0.317505773 | 2.2         | 0.451946146 | 90.5 |
| 1.52825E-08 | 0.160833498 | 96 | -0.988483119 | 0.33707976  | 2.170212766 | 0.377834744 | 90.6 |
| 1.58587E-08 | 0.028057542 | 54 | -1.460617053 | 0.265502247 | 5.25958379  | 2.494177132 | 8.7  |
| 1.63525E-08 | 0.104537563 | 51 | -1.136497959 | 0.230661079 | 2.528239203 | 0.814473177 | 69.9 |
| 1.70225E-08 | 0.134994325 | 99 | -1.063572288 | 0.257651468 | 2.380952381 | 0.745808959 | 81.1 |
| 1.72272E-08 | 0.162494036 | 91 | -1.005188644 | 0.299550167 | 2.276785714 | 0.54043395  | 88.8 |
| 1.77815E-08 | 0.06838154  | 25 | -1.235681601 | 0.225890137 | 2.978533095 | 1.189667582 | 44.1 |
| 1.82548E-08 | 0.001912839 | 99 | -1.309060885 | 0.42393027  | 24.852      | 7.278122496 | 0    |
| 1.82589E-08 | 0.194236652 | 81 | -0.965604974 | 0.336085499 | 2.220930233 | 0.470323113 | 91.4 |
| 1.86388E-08 | 0.168700576 | 34 | -1.019028473 | 0.267958198 | 2.345588235 | 0.6131724   | 86.4 |
| 1.87695E-08 | 0.04253625  | 20 | -1.397551404 | 0.247532211 | 4.240143369 | 1.922770623 | 16.3 |
| 1.93798E-08 | 0.029317604 | 67 | -1.518148596 | 0.267990532 | 6.057894737 | 2.760517924 | 5    |
| 2.00498E-08 | 0.147561911 | 2  | -1.041229389 | 0.250834505 | 2.398989899 | 0.717722703 | 80.2 |
| 2.01275E-08 | 0.119226668 | 90 | -1.107970939 | 0.260777195 | 2.53125     | 0.799073719 | 68   |
| 2.06463E-08 | 0.033862157 | 66 | -1.498791879 | 0.281356725 | 5.629669157 | 2.613756997 | 6.3  |
| 2.07996E-08 | 0.08871058  | 37 | -1.20025501  | 0.230868452 | 2.815286624 | 1.036493615 | 52.9 |
| 2.08299E-08 | 0.044935262 | 79 | -1.40027667  | 0.258072736 | 4.409038239 | 2.135928837 | 13.7 |
| 2.10308E-08 | 0.188900915 | 92 | -0.930119822 | 0.313707961 | 2.295454545 | 0.534870126 | 86.8 |
| 2.13643E-08 | 0.186701684 | 98 | -1.022212528 | 0.290788563 | 2.348484848 | 0.641858567 | 86.8 |
| 2.17089E-08 | 0.126026928 | 68 | -1.097393858 | 0.273962162 | 2.605015674 | 0.961903209 | 68.1 |
| 2.17641E-08 | 0.019118405 | 96 | -1.661553305 | 0.260471933 | 9.518108652 | 4.004299558 | 0.6  |
| 2.19014E-08 | 0.088611417 | 59 | -1.19748045  | 0.239604912 | 2.880324544 | 1.106098347 | 50.7 |
| 2.27139E-08 | 0.04778282  | 6  | -1.411357093 | 0.251557644 | 4.427710843 | 2.095190267 | 17   |
| 2.28218E-08 | 0.193667433 | 13 | -0.96211986  | 0.30454337  | 2.201680672 | 0.461754795 | 88.1 |
| 2.33544E-08 | 0.190849318 | 66 | -0.977355022 | 0.313655215 | 2.322368421 | 0.636650732 | 84.8 |
| 2.36558E-08 | 0.001948288 | 88 | -1.374743654 | 0.411292592 | 30.966      | 8.485803018 | 0    |
| 2.42326E-08 | 0.108126355 | 4  | -1.159389608 | 0.245092304 | 2.777272727 | 1.088532823 | 56   |
| 2.42992E-08 | 0.142113581 | 61 | -1.065484424 | 0.233305221 | 2.443661972 | 0.728274478 | 71.6 |
| 2.43615E-08 | 0.158688121 | 81 | -1.068279613 | 0.279633649 | 2.517073171 | 0.770759251 | 79.5 |
| 2.43992E-08 | 0.00658896  | 63 | -1.694715431 | 0.28573051  | 20.76       | 6.63041193  | 0    |
| 2.49798E-08 | 0.010398879 | 45 | -1.748196946 | 0.265568396 | 17.148      | 6.033780117 | 0    |
| 2.51393E-08 | 0.186037772 | 52 | -0.984606054 | 0.315367101 | 2.357575758 | 0.68031122  | 83.5 |
| 2.52103E-08 | 0.126946612 | 66 | -1.122561726 | 0.261626974 | 2.653521127 | 0.930316602 | 64.5 |
| 2.59100E-08 | 0.116103656 | 74 | -1.112509918 | 0.269557827 | 2.72361809  | 1.025614014 | 60.2 |
| 2.61081E-08 | 0.162699277 | 46 | -1.048846153 | 0.247566932 | 2.408071749 | 0.728646378 | 77.7 |
| 2.63367E-08 | 0.077065189 | 13 | -1.294867779 | 0.253340497 | 3.54294032  | 1.536002944 | 31.3 |
| 2.63809E-08 | 0.06712947  | 27 | -1.327597687 | 0.257203152 | 3.785620915 | 1.771960871 | 23.5 |
| 2.69864E-08 | 0.196584834 | 30 | -0.947872541 | 0.320109436 | 2.347058824 | 0.664053936 | 83   |
| 2.71456E-08 | 0.193349643 | 16 | -0.946533214 | 0.339147232 | 2.388888889 | 0.654924525 | 82   |
| 2.72271E-08 | 0.179197088 | 60 | -0.99816553  | 0.30528566  | 2.391509434 | 0.690163512 | 78.8 |
| 2.72913E-08 | 0.051432378 | 32 | -1.453762469 | 0.260203136 | 4.895761741 | 2.237994043 | 12.7 |
| 2.74122E-08 | 0.126417189 | 93 | -1.119262301 | 0.273767692 | 2.722527473 | 1.037818323 | 63.6 |
| 2.74777E-08 | 0.187174034 | 43 | -0.939425824 | 0.344707126 | 2.434782609 | 0.772538896 | 81.6 |
| 2.77261E-08 | 0.135177669 | 48 | -1.096222267 | 0.274659883 | 2.626740947 | 0.933521127 | 64.1 |
| 2.77473E-08 | 0.011572525 | 50 | -1.787263772 | 0.245301687 | 16.83583584 | 5.907187724 | 0.1  |
| 2.78436E-08 | 0.158181546 | 29 | -1.075676761 | 0.28069892  | 2.625       | 0.914344911 | 73.6 |

|             |             |    |              |             |             |             |      |
|-------------|-------------|----|--------------|-------------|-------------|-------------|------|
| 2.79716E-08 | 0.121370404 | 23 | -1.140570717 | 0.22730336  | 2.767494357 | 1.066830124 | 55.7 |
| 2.80729E-08 | 0.124909106 | 73 | -1.119453462 | 0.278057272 | 2.762626263 | 1.071715611 | 60.4 |
| 2.82604E-08 | 0.181244541 | 30 | -0.979477082 | 0.321192902 | 2.418719212 | 0.729196177 | 79.7 |
| 2.86772E-08 | 0.018544266 | 96 | -1.767353907 | 0.241837272 | 12.40540541 | 4.853444412 | 0.1  |
| 2.93195E-08 | 0.130182068 | 74 | -1.09413657  | 0.290354767 | 2.743529412 | 1.005931355 | 57.5 |
| 3.01743E-08 | 0.18749573  | 90 | -0.984159067 | 0.285103658 | 2.372641509 | 0.658741155 | 78.8 |
| 3.03145E-08 | 0.038624241 | 15 | -1.591359269 | 0.253253933 | 6.70880829  | 3.20256237  | 3.5  |
| 3.03352E-08 | 0.072671652 | 78 | -1.313701349 | 0.262304542 | 3.765306122 | 1.79996322  | 21.6 |
| 3.04411E-08 | 0.068350278 | 19 | -1.356203388 | 0.2564287   | 4.048689139 | 1.92779055  | 19.9 |
| 3.10588E-08 | 0.024551968 | 14 | -1.740643367 | 0.245955077 | 10.40080564 | 4.45321551  | 0.7  |
| 3.10593E-08 | 0.109796989 | 53 | -1.173573286 | 0.272641215 | 3.001988072 | 1.264752005 | 49.7 |
| 3.15457E-08 | 0.006028588 | 66 | -1.743420009 | 0.278227625 | 27.554      | 7.935619576 | 0    |
| 3.16380E-08 | 0.03873084  | 24 | -1.599565843 | 0.25658156  | 6.845435685 | 3.172108771 | 3.6  |
| 3.19440E-08 | 0.126001308 | 32 | -1.150032042 | 0.257219056 | 2.902953586 | 1.138910002 | 52.6 |
| 3.28659E-08 | 0.188181744 | 55 | -1.012516885 | 0.290534947 | 2.445544554 | 0.785126    | 79.8 |
| 3.28880E-08 | 0.070431639 | 45 | -1.380510201 | 0.255350269 | 4.323636364 | 2.009863146 | 17.5 |
| 3.29551E-08 | 0.128145353 | 22 | -1.154887402 | 0.281660236 | 2.969565217 | 1.229249477 | 54   |
| 3.32757E-08 | 0.15603905  | 62 | -1.056789878 | 0.289017561 | 2.611594203 | 0.964415752 | 65.5 |
| 3.34054E-08 | 0.131182663 | 33 | -1.142894011 | 0.298182441 | 2.887417219 | 1.178023579 | 54.7 |
| 3.40177E-08 | 0.075036148 | 81 | -1.338646579 | 0.271325031 | 4.005025126 | 1.949029721 | 20.4 |
| 3.46501E-08 | 0.037579753 | 47 | -1.641431633 | 0.262216759 | 7.686734694 | 3.578797447 | 2    |
| 3.54171E-08 | 0.13890189  | 18 | -1.106733977 | 0.270906155 | 2.764150943 | 1.065707785 | 57.6 |
| 3.58636E-08 | 0.03356998  | 77 | -1.707681451 | 0.256625339 | 9.06612411  | 3.989127527 | 1.7  |
| 3.60594E-08 | 0.077295303 | 63 | -1.360822456 | 0.254736297 | 4.15776699  | 1.963051872 | 17.6 |
| 3.64318E-08 | 0.135068725 | 40 | -1.134055041 | 0.283041339 | 2.919354839 | 1.183023172 | 50.4 |
| 3.67460E-08 | 0.088118733 | 24 | -1.306619464 | 0.277618495 | 3.779548473 | 1.792198314 | 24.7 |
| 3.74177E-08 | 0.085571195 | 24 | -1.314211951 | 0.288079899 | 3.898832685 | 1.792520155 | 22.9 |
| 3.79671E-08 | 0.097927423 | 31 | -1.277687544 | 0.280236214 | 3.627737226 | 1.626746921 | 31.5 |
| 3.83399E-08 | 0.18967709  | 84 | -0.948242067 | 0.347297603 | 2.518394649 | 0.8286984   | 70.1 |
| 3.87822E-08 | 0.160174614 | 45 | -1.07006409  | 0.3153692   | 2.712328767 | 0.97326137  | 63.5 |
| 3.88599E-08 | 0.074314286 | 71 | -1.392087492 | 0.279256515 | 4.544273908 | 2.124964116 | 15.3 |
| 3.97460E-08 | 0.121794102 | 59 | -1.176261446 | 0.263746461 | 3.086805556 | 1.291887545 | 42.4 |
| 3.98361E-08 | 0.110882519 | 14 | -1.223632301 | 0.272236659 | 3.368499257 | 1.520990134 | 32.7 |
| 4.00437E-08 | 0.007419299 | 65 | -1.846489668 | 0.252321243 | 31.474      | 8.789230602 | 0    |
| 4.00787E-08 | 0.179253021 | 81 | -1.034597282 | 0.316023444 | 2.618902439 | 0.897435703 | 67.2 |
| 4.06806E-08 | 0.004447736 | 33 | -1.728623338 | 0.282180432 | 40.536      | 10.68198525 | 0    |
| 4.10283E-08 | 0.179458796 | 67 | -1.035383639 | 0.326309415 | 2.576923077 | 0.841258066 | 66.2 |
| 4.17174E-08 | 0.064628208 | 43 | -1.488539862 | 0.278977912 | 5.521546961 | 2.765109304 | 9.5  |
| 4.18112E-08 | 0.014176559 | 58 | -1.911656544 | 0.215369676 | 22.101      | 7.368520482 | 0    |
| 4.21990E-08 | 0.069601105 | 87 | -1.448272612 | 0.273257538 | 5.067114094 | 2.59510547  | 10.6 |
| 4.22649E-08 | 0.059863422 | 3  | -1.52545127  | 0.273099346 | 5.825531915 | 2.751587253 | 6    |
| 4.22991E-08 | 0.068692159 | 83 | -1.464700005 | 0.271343289 | 5.1171875   | 2.455570639 | 10.4 |
| 4.30696E-08 | 0.093657618 | 49 | -1.319643736 | 0.268975063 | 4.039042821 | 2.047909669 | 20.6 |
| 4.30767E-08 | 0.120789975 | 19 | -1.204555362 | 0.26835306  | 3.321821036 | 1.396889338 | 36.3 |
| 4.40754E-08 | 0.150367728 | 4  | -1.116256619 | 0.290956678 | 3.004106776 | 1.247212354 | 51.3 |
| 4.41865E-08 | 0.174184304 | 47 | -1.065990165 | 0.309784824 | 2.800970874 | 1.091528551 | 58.8 |
| 4.42550E-08 | 0.048952082 | 28 | -1.632507696 | 0.271695922 | 7.392820513 | 3.559489983 | 2.5  |
| 4.45005E-08 | 0.00605235  | 67 | -1.838727553 | 0.262381873 | 37.079      | 10.21661089 | 0    |
| 4.51102E-08 | 0.116337226 | 30 | -1.225835771 | 0.278870589 | 3.515151515 | 1.584661151 | 34   |
| 4.51624E-08 | 0.008590777 | 67 | -1.902690269 | 0.239763927 | 31.809      | 9.51015047  | 0    |
| 4.52507E-08 | 0.072360345 | 27 | -1.473201546 | 0.27838139  | 5.336225597 | 2.591175634 | 7.8  |
| 4.52644E-08 | 0.049148661 | 7  | -1.640454573 | 0.275062185 | 7.625514403 | 3.512474055 | 2.8  |

|             |             |    |              |             |             |             |      |
|-------------|-------------|----|--------------|-------------|-------------|-------------|------|
| 4.58375E-08 | 0.082761083 | 11 | -1.390266488 | 0.263988306 | 4.568469505 | 2.192145611 | 13.1 |
| 4.59814E-08 | 0.015692463 | 76 | -1.939526346 | 0.21191459  | 22.119      | 7.431693553 | 0    |
| 4.65201E-08 | 0.087850088 | 88 | -1.375365351 | 0.274626443 | 4.430094787 | 2.148926072 | 15.6 |
| 4.69712E-08 | 0.169363729 | 77 | -1.056946782 | 0.316878342 | 2.922727273 | 1.247660889 | 56   |
| 4.74198E-08 | 0.15336794  | 44 | -1.101334501 | 0.312214703 | 3.005882353 | 1.361108956 | 49   |
| 4.77424E-08 | 0.141501597 | 52 | -1.139694211 | 0.331548142 | 3.19343696  | 1.455412913 | 42.1 |
| 4.77553E-08 | 0.1518446   | 82 | -1.121040941 | 0.306511403 | 3.082568807 | 1.282865304 | 45.5 |
| 4.79167E-08 | 0.179497246 | 48 | -1.054439002 | 0.304803988 | 2.708860759 | 0.994297175 | 60.5 |
| 4.80844E-08 | 0.145199405 | 61 | -1.115385886 | 0.309429088 | 3.070143885 | 1.322204267 | 44.4 |
| 4.93696E-08 | 0.056948265 | 49 | -1.605599545 | 0.273239165 | 7.047131148 | 3.42147546  | 2.4  |
| 4.95222E-08 | 0.125806707 | 84 | -1.213863937 | 0.259113039 | 3.459541985 | 1.480080719 | 34.5 |
| 4.95710E-08 | 0.121119899 | 73 | -1.232531223 | 0.291127904 | 3.631954351 | 1.657469768 | 29.9 |
| 4.97218E-08 | 0.106983586 | 29 | -1.276708714 | 0.311563474 | 3.909214092 | 1.897980554 | 26.2 |
| 5.00838E-08 | 0.01152962  | 31 | -1.965089939 | 0.211308235 | 28.862      | 8.914730979 | 0    |
| 5.11168E-08 | 0.168721148 | 63 | -1.068644978 | 0.331325362 | 2.915019763 | 1.152995109 | 49.4 |
| 5.14290E-08 | 0.163176623 | 86 | -1.104035862 | 0.296823345 | 3.005928854 | 1.233992324 | 49.4 |
| 5.15830E-08 | 0.087953779 | 20 | -1.376949878 | 0.286049984 | 4.653758542 | 2.228339958 | 12.2 |
| 5.17548E-08 | 0.161152842 | 41 | -1.090584051 | 0.297859921 | 3.024048096 | 1.187037945 | 50.1 |
| 5.19361E-08 | 0.062704661 | 41 | -1.595235379 | 0.282411658 | 6.860294118 | 3.356243944 | 4.8  |
| 5.28199E-08 | 0.042245061 | 71 | -1.779328133 | 0.247690781 | 10.45975855 | 4.487746587 | 0.6  |
| 5.28255E-08 | 0.063306001 | 46 | -1.567188051 | 0.281668395 | 6.61105318  | 3.207168842 | 4.1  |
| 5.31820E-08 | 0.008935906 | 60 | -1.948120994 | 0.231650327 | 36.118      | 10.16047791 | 0    |
| 5.33833E-08 | 0.196059525 | 42 | -0.9888226   | 0.339468613 | 2.664160401 | 0.949738782 | 60.1 |
| 5.36643E-08 | 0.106108984 | 82 | -1.321821568 | 0.283392556 | 4.155927835 | 1.948409685 | 22.4 |
| 5.37567E-08 | 0.115271647 | 96 | -1.262042197 | 0.291454253 | 3.822768435 | 1.731571838 | 22.7 |
| 5.37605E-08 | 0.136818281 | 26 | -1.174428789 | 0.308828459 | 3.341732283 | 1.451010794 | 36.5 |
| 5.42478E-08 | 0.007267228 | 87 | -1.902644506 | 0.239456324 | 40.917      | 10.80772492 | 0    |
| 5.45313E-08 | 0.122548245 | 11 | -1.235431792 | 0.279289648 | 3.67798913  | 1.622412508 | 26.4 |
| 5.47603E-08 | 0.109345728 | 20 | -1.299795208 | 0.296287224 | 4.131611316 | 1.954821496 | 18.7 |
| 5.56244E-08 | 0.10416775  | 53 | -1.334503008 | 0.291461337 | 4.369512195 | 2.121187323 | 18   |
| 5.56793E-08 | 0.12543903  | 51 | -1.226467123 | 0.303297667 | 3.671724138 | 1.825944978 | 27.5 |
| 5.57216E-08 | 0.180434003 | 80 | -1.082790968 | 0.314082881 | 3.078947368 | 1.257771825 | 50.6 |
| 5.58493E-08 | 0.193865959 | 78 | -1.0217415   | 0.347692376 | 2.826506024 | 1.076212308 | 58.5 |
| 5.60914E-08 | 0.058138095 | 29 | -1.667646791 | 0.264036245 | 8.047082907 | 3.731489037 | 2.3  |
| 5.61151E-08 | 0.112464925 | 61 | -1.305162748 | 0.286586333 | 4.119791667 | 1.918475046 | 23.2 |
| 5.64214E-08 | 0.195214354 | 54 | -1.000697513 | 0.322795056 | 2.84057971  | 1.106308414 | 58.6 |
| 5.64275E-08 | 0.187407629 | 14 | -1.026662064 | 0.346304436 | 2.915367483 | 1.148352823 | 55.1 |
| 5.66711E-08 | 0.18264967  | 63 | -1.037419448 | 0.321467929 | 2.884090909 | 1.18368622  | 56   |
| 5.69467E-08 | 0.095471112 | 95 | -1.386375075 | 0.297169207 | 4.825934579 | 2.399577022 | 14.4 |
| 5.77445E-08 | 0.035818002 | 73 | -1.874570294 | 0.223807816 | 13.02802803 | 5.214940693 | 0.1  |
| 5.80649E-08 | 0.146920977 | 22 | -1.163898799 | 0.314599189 | 3.381789137 | 1.532450271 | 37.4 |
| 5.82768E-08 | 0.13321176  | 78 | -1.212145201 | 0.291306829 | 3.552407932 | 1.649655415 | 29.4 |
| 5.83021E-08 | 0.051742495 | 9  | -1.716831162 | 0.264563631 | 9.013184584 | 4.178119048 | 1.4  |
| 5.88793E-08 | 0.025214899 | 55 | -1.97655638  | 0.209226376 | 19.125      | 6.973378163 | 0    |
| 5.97397E-08 | 0.151678629 | 64 | -1.141115748 | 0.323160391 | 3.373417722 | 1.486267524 | 36.8 |
| 5.98344E-08 | 0.041260736 | 11 | -1.832199046 | 0.245698481 | 11.90562249 | 4.958838464 | 0.4  |
| 6.04012E-08 | 0.151567184 | 32 | -1.157430252 | 0.290811915 | 3.322033898 | 1.421665969 | 35.1 |
| 6.04017E-08 | 0.046380679 | 38 | -1.791959762 | 0.258017848 | 10.77194753 | 4.819411522 | 0.9  |
| 6.04703E-08 | 0.171901895 | 29 | -1.113354796 | 0.300565883 | 3.130208333 | 1.256104658 | 42.4 |
| 6.08165E-08 | 0.078767198 | 58 | -1.514779552 | 0.29173394  | 6.097430407 | 3.021915988 | 6.6  |
| 6.08671E-08 | 0.080094909 | 40 | -1.51341542  | 0.290154984 | 6.069222577 | 2.962541649 | 6.1  |
| 6.09768E-08 | 0.04038015  | 95 | -1.858603574 | 0.235942864 | 12.66566567 | 5.250282208 | 0.1  |

|             |             |    |              |             |             |             |      |
|-------------|-------------|----|--------------|-------------|-------------|-------------|------|
| 6.16821E-08 | 0.093311023 | 70 | -1.413053499 | 0.305851606 | 5.192784667 | 2.539092509 | 11.3 |
| 6.18358E-08 | 0.003105391 | 23 | -1.757031883 | 0.284076314 | 61.184      | 15.78928261 | 0    |
| 6.19557E-08 | 0.000680834 | 10 | -1.472204287 | 0.370760764 | 78.733      | 18.19947614 | 0    |
| 6.25196E-08 | 0.043548086 | 61 | -1.847056048 | 0.240738027 | 11.91247485 | 5.026354042 | 0.6  |
| 6.26388E-08 | 0.006197232 | 3  | -1.910359979 | 0.241603025 | 49.656      | 12.78542651 | 0    |
| 6.28144E-08 | 0.089991688 | 42 | -1.430386712 | 0.287536753 | 5.266015201 | 2.545205697 | 7.9  |
| 6.29269E-08 | 0.062816499 | 28 | -1.655222565 | 0.266685946 | 8.060762101 | 3.726115005 | 2.9  |
| 6.29490E-08 | 0.115705576 | 38 | -1.299440858 | 0.300059441 | 4.261239368 | 2.044169662 | 17.7 |
| 6.30087E-08 | 0.02833647  | 39 | -1.97211339  | 0.213786015 | 18.08508509 | 6.827077394 | 0.1  |
| 6.32787E-08 | 0.11565336  | 8  | -1.298228507 | 0.300252073 | 4.216381418 | 2.03539683  | 18.2 |
| 6.34922E-08 | 0.177816587 | 63 | -1.065888142 | 0.327278154 | 3.118299445 | 1.308397971 | 45.9 |
| 6.37770E-08 | 0.091894077 | 37 | -1.425144197 | 0.297130513 | 5.27795874  | 2.696382956 | 7.9  |
| 6.39081E-08 | 0.136685745 | 87 | -1.213213947 | 0.30062682  | 3.742587601 | 1.715152064 | 25.8 |
| 6.44031E-08 | 0.0622268   | 87 | -1.675588309 | 0.262221322 | 8.286004057 | 3.841708965 | 1.4  |
| 6.51204E-08 | 0.182882459 | 9  | -1.017862616 | 0.369157437 | 3.005545287 | 1.197979289 | 45.9 |
| 6.52500E-08 | 0.055291347 | 46 | -1.729548834 | 0.276368097 | 9.520812183 | 4.549839557 | 1.5  |
| 6.54777E-08 | 0.018066283 | 90 | -2.031396988 | 0.192812536 | 27.293      | 8.980857799 | 0    |
| 6.59931E-08 | 0.107429777 | 38 | -1.368804037 | 0.30531698  | 4.791860465 | 2.426028585 | 14   |
| 6.62527E-08 | 0.103102162 | 94 | -1.380413344 | 0.306068572 | 4.863945578 | 2.449414086 | 11.8 |
| 6.63110E-08 | 0.168995134 | 48 | -1.119446729 | 0.314576364 | 3.191558442 | 1.337025034 | 38.4 |
| 6.65924E-08 | 0.156218456 | 91 | -1.14480705  | 0.32362419  | 3.484210526 | 1.569707694 | 33.5 |
| 6.70064E-08 | 0.107908052 | 22 | -1.351492211 | 0.308453316 | 4.710801394 | 2.351889282 | 13.9 |
| 6.78114E-08 | 0.139843505 | 17 | -1.212771296 | 0.323831975 | 3.74796748  | 1.682023218 | 26.2 |
| 6.78407E-08 | 0.172280952 | 39 | -1.095421821 | 0.366439467 | 3.274873524 | 1.420289521 | 40.7 |
| 6.84194E-08 | 0.006145635 | 27 | -1.946685872 | 0.236363442 | 54.12       | 13.78069329 | 0    |
| 6.84434E-08 | 0.12504925  | 92 | -1.292133108 | 0.312171698 | 4.207286432 | 2.007782888 | 20.4 |
| 6.87551E-08 | 0.156191324 | 37 | -1.119010364 | 0.334869372 | 3.391629297 | 1.525920319 | 33.1 |
| 6.88514E-08 | 0.046376509 | 52 | -1.836189957 | 0.241212578 | 12.01603206 | 5.183662272 | 0.2  |
| 6.89897E-08 | 0.109093    | 83 | -1.358025461 | 0.312075186 | 4.790993072 | 2.357908779 | 13.4 |
| 6.90035E-08 | 0.038231201 | 30 | -1.906839032 | 0.238527403 | 14.6002004  | 5.859392237 | 0.2  |
| 7.10289E-08 | 0.011504202 | 9  | -2.037323738 | 0.200623867 | 38.597      | 11.53002743 | 0    |
| 7.16371E-08 | 0.119795949 | 33 | -1.316158395 | 0.313163254 | 4.464670659 | 2.129981194 | 16.5 |
| 7.19062E-08 | 0.108944477 | 12 | -1.380574391 | 0.288661169 | 4.992081448 | 2.469965582 | 11.6 |
| 7.21496E-08 | 0.098247163 | 75 | -1.436293783 | 0.308634183 | 5.46961326  | 2.786546052 | 9.5  |
| 7.25245E-08 | 0.103848526 | 67 | -1.426490338 | 0.302543919 | 5.431263858 | 2.54574973  | 9.8  |
| 7.27304E-08 | 0.117376649 | 22 | -1.349979489 | 0.289068135 | 4.754022989 | 2.19250762  | 13   |
| 7.32176E-08 | 0.146257167 | 77 | -1.200394421 | 0.32146923  | 3.733695652 | 1.815205746 | 26.4 |
| 7.39357E-08 | 0.067156525 | 6  | -1.681634223 | 0.279895496 | 8.593462717 | 4.078749127 | 2.1  |
| 7.41321E-08 | 0.053917111 | 80 | -1.797485041 | 0.250298879 | 10.92978937 | 4.867633994 | 0.3  |
| 7.47834E-08 | 0.01056615  | 62 | -2.041916749 | 0.197098565 | 42.509      | 12.23558861 | 0    |
| 7.53146E-08 | 0.035572741 | 85 | -1.977216193 | 0.209541238 | 17.444      | 6.943707877 | 0    |
| 7.57802E-08 | 0.10716773  | 18 | -1.406796573 | 0.31238153  | 5.28443449  | 2.702712812 | 10.7 |
| 7.64065E-08 | 0.138503474 | 65 | -1.240604605 | 0.331338091 | 4.090676884 | 2.014195765 | 21.7 |
| 7.64381E-08 | 0.196662457 | 81 | -1.038466995 | 0.350915754 | 3.114840989 | 1.288159375 | 43.4 |
| 7.64884E-08 | 0.104148309 | 41 | -1.437612716 | 0.291200144 | 5.499454744 | 2.621970018 | 8.3  |
| 7.66837E-08 | 0.035334821 | 34 | -1.982120303 | 0.207827013 | 17.65465465 | 6.702514697 | 0.1  |
| 7.70067E-08 | 0.104346935 | 4  | -1.434300125 | 0.305645228 | 5.468271335 | 2.664845554 | 8.6  |
| 7.70446E-08 | 0.119738701 | 48 | -1.347977488 | 0.287615347 | 4.806146572 | 2.348412038 | 15.4 |
| 7.72469E-08 | 0.107084332 | 87 | -1.408349231 | 0.313113278 | 5.424342105 | 2.700323111 | 8.8  |
| 7.74814E-08 | 0.104165302 | 9  | -1.429079279 | 0.318819512 | 5.551155116 | 2.726293753 | 9.1  |
| 7.75143E-08 | 0.19806486  | 69 | -1.045020452 | 0.33264489  | 3.119565217 | 1.290836541 | 44.8 |
| 7.78493E-08 | 0.15580692  | 62 | -1.176273047 | 0.347146339 | 3.754143646 | 1.691340556 | 27.6 |

|             |             |    |              |             |             |             |      |
|-------------|-------------|----|--------------|-------------|-------------|-------------|------|
| 7.81855E-08 | 0.068335055 | 67 | -1.709492144 | 0.271330355 | 9.195519348 | 4.18828767  | 1.8  |
| 7.94475E-08 | 0.141996715 | 54 | -1.232695038 | 0.327331097 | 4.045278137 | 1.959900886 | 22.7 |
| 7.96747E-08 | 0.05179033  | 8  | -1.857153814 | 0.23273021  | 12.50100402 | 5.351841743 | 0.4  |
| 7.98109E-08 | 0.171308257 | 61 | -1.111898946 | 0.351002857 | 3.480406386 | 1.60304284  | 31.1 |
| 7.98632E-08 | 0.015347036 | 60 | -2.086089792 | 0.182644749 | 38.337      | 11.27086791 | 0    |
| 8.01717E-08 | 0.029186794 | 35 | -2.041032616 | 0.183033598 | 21.92592593 | 7.99752708  | 0.1  |
| 8.02683E-08 | 0.077663736 | 31 | -1.637813272 | 0.27513677  | 7.854657114 | 3.883730423 | 2.3  |
| 8.13490E-08 | 0.062851419 | 34 | -1.761976417 | 0.258065989 | 10.15656566 | 4.642174049 | 1    |
| 8.13954E-08 | 0.082687839 | 58 | -1.59664563  | 0.284604228 | 7.356701031 | 3.521800225 | 3    |
| 8.27291E-08 | 0.043498562 | 10 | -1.930263091 | 0.226905057 | 15.218      | 6.20201104  | 0    |
| 8.31551E-08 | 0.065013744 | 32 | -1.733910921 | 0.254109252 | 9.656565657 | 4.405074783 | 1    |
| 8.32055E-08 | 0.198865815 | 7  | -1.057386001 | 0.360799442 | 3.336148649 | 1.514792497 | 40.8 |
| 8.34291E-08 | 0.04059482  | 20 | -1.961650005 | 0.21302687  | 16.272      | 6.307281332 | 0    |
| 8.36063E-08 | 0.105020254 | 73 | -1.464206677 | 0.297449383 | 5.857451404 | 2.875278334 | 7.4  |
| 8.38460E-08 | 0.022189871 | 68 | -2.094246755 | 0.188941813 | 29.35       | 9.70008204  | 0    |
| 8.44043E-08 | 0.173551287 | 94 | -1.120202835 | 0.367050897 | 3.553284672 | 1.739338917 | 31.5 |
| 8.48633E-08 | 0.007450883 | 82 | -2.009825318 | 0.220298767 | 59.352      | 15.85128889 | 0    |
| 8.50673E-08 | 0.038016401 | 81 | -2.002247439 | 0.203001912 | 18.04       | 6.680646004 | 0    |
| 8.52202E-08 | 0.101056905 | 39 | -1.482953891 | 0.304604221 | 6.034151547 | 3.054509618 | 6.3  |
| 8.53627E-08 | 0.068402003 | 95 | -1.743708689 | 0.26522379  | 9.977732794 | 4.706535812 | 1.2  |
| 8.60217E-08 | 0.150985712 | 16 | -1.202945275 | 0.341059198 | 4.100250627 | 2.01000632  | 20.2 |
| 8.70011E-08 | 0.160138506 | 29 | -1.201880229 | 0.326978693 | 3.853887399 | 1.83591088  | 25.4 |
| 8.70292E-08 | 0.060189765 | 80 | -1.806914909 | 0.258185685 | 11.13622603 | 4.816701739 | 0.9  |
| 8.77588E-08 | 0.022669986 | 70 | -2.095047571 | 0.184581303 | 29.638      | 9.70026036  | 0    |
| 8.78073E-08 | 0.048159959 | 26 | -1.908398816 | 0.226948388 | 14.48348348 | 5.882745181 | 0.1  |
| 8.82687E-08 | 0.011916842 | 60 | -2.099889315 | 0.187705653 | 47.196      | 13.15022861 | 0    |
| 8.85433E-08 | 0.003956779 | 87 | -1.906430565 | 0.239726704 | 76.384      | 18.27053246 | 0    |
| 8.87385E-08 | 0.104898223 | 9  | -1.4714337   | 0.306510486 | 6.021164021 | 2.959396254 | 5.5  |
| 8.90021E-08 | 0.055814096 | 5  | -1.855867407 | 0.24928679  | 12.59638554 | 5.346839294 | 0.4  |
| 8.96809E-08 | 0.155377217 | 63 | -1.196451693 | 0.352137991 | 4.075255102 | 1.9556252   | 21.6 |
| 8.99073E-08 | 0.023796868 | 77 | -2.097168783 | 0.180597954 | 29.654      | 9.609090416 | 0    |
| 1.01063E-09 | 0.16210266  | 90 | -1.145825701 | NA          | 2           | NA          | 99.9 |
| 1.01121E-09 | 0.02783863  | 96 | -1.091958642 | 0.161187493 | 2.046511628 | 0.213082632 | 95.7 |
| 1.04348E-09 | 0.110131915 | 50 | -0.630464825 | NA          | 2           | NA          | 99.9 |
| 1.04485E-09 | 0.113399701 | 89 | -1.145825701 | NA          | 2           | NA          | 99.9 |
| 1.07424E-09 | 0.055495772 | 82 | -1.047470297 | 0.16814295  | 2           | 0           | 98.8 |
| 1.16816E-09 | 0.008937843 | 7  | -0.977191086 | 0.301575353 | 2.452755906 | 0.772381643 | 74.6 |
| 1.21365E-09 | 0.125557871 | 61 | -1.071054154 | NA          | 2           | NA          | 99.9 |
| 1.25418E-09 | 0.09047163  | 49 | -1.02834383  | 0.302137564 | 2.166666667 | 0.389249472 | 98.8 |
| 1.31478E-09 | 0.039668732 | 61 | -1.120522179 | 0.138447973 | 2.125       | 0.336010753 | 96.8 |
| 1.40847E-09 | 0.014239514 | 87 | -1.011873337 | 0.280916267 | 2.387254902 | 0.613505083 | 79.6 |
| 1.51991E-09 | 0.119043647 | 65 | -0.995746611 | 0.07477731  | 2           | 0           | 99.7 |
| 1.52486E-09 | 0.186840658 | 79 | -1.145825701 | 0           | 2           | 0           | 99.8 |
| 1.62228E-09 | 0.013049045 | 11 | -1.064911351 | 0.29785085  | 2.467857143 | 0.7613201   | 72   |
| 1.62990E-09 | 0.090763131 | 87 | -1.145825701 | 0.076379537 | 2           | 0           | 99.7 |
| 1.68352E-09 | 0.127417494 | 44 | -0.84007784  | 0.328940047 | 2           | 0           | 99.3 |
| 1.76480E-09 | 0.043105804 | 9  | -1.11251557  | 0.207585879 | 2.218181818 | 0.497806637 | 94.5 |
| 1.81013E-09 | 0.083598026 | 91 | -1.094679242 | 0.141481647 | 2           | 0           | 98.7 |
| 1.85998E-09 | 0.025107286 | 24 | -1.089896368 | 0.21343108  | 2.291666667 | 0.601571369 | 85.6 |
| 1.88701E-09 | 0.032777442 | 37 | -1.109574203 | 0.195837684 | 2.26744186  | 0.540684068 | 91.4 |
| 1.88956E-09 | 0.022238668 | 56 | -1.088972753 | 0.216306205 | 2.353773585 | 0.625170995 | 78.8 |
| 1.89115E-09 | 0.050529576 | 78 | -1.119976461 | 0.214985229 | 2.125       | 0.40430377  | 96   |

|             |             |    |              |             |             |             |      |
|-------------|-------------|----|--------------|-------------|-------------|-------------|------|
| 1.90273E-09 | 0.106539955 | 82 | -0.920335991 | 0.24306698  | 2           | 0           | 98.7 |
| 1.93148E-09 | 0.021324877 | 89 | -1.092682768 | 0.207997235 | 2.327014218 | 0.570864086 | 78.9 |
| 1.95247E-09 | 0.112849528 | 1  | -1.006942223 | 0.224500291 | 2.090909091 | 0.301511345 | 98.9 |
| 1.96626E-09 | 0.117030422 | 62 | -1.339250771 | 0.123420036 | 3           | 0           | 99.8 |
| 1.96692E-09 | 0.03574858  | 94 | -1.12390884  | 0.170902929 | 2.208791209 | 0.435034699 | 90.9 |
| 2.00049E-09 | 0.024377374 | 57 | -1.087557527 | 0.242330438 | 2.254143646 | 0.539080453 | 81.9 |
| 2.04593E-09 | 0.023275372 | 26 | -1.107615277 | 0.204715163 | 2.292079208 | 0.637810803 | 79.8 |
| 2.11450E-09 | 0.023923197 | 94 | -1.088545706 | 0.227540295 | 2.315508021 | 0.560266002 | 81.3 |
| 2.16334E-09 | 0.006863784 | 73 | -0.991580847 | 0.355518766 | 3.04886562  | 1.331852752 | 42.7 |
| 2.18700E-09 | 0.011080759 | 44 | -1.034890037 | 0.322627879 | 2.699763593 | 0.942505957 | 57.7 |
| 2.20747E-09 | 0.037835737 | 23 | -1.098075992 | 0.232314364 | 2.210526316 | 0.549321751 | 92.4 |
| 2.21115E-09 | 0.013832197 | 29 | -1.085793598 | 0.276607108 | 2.608478803 | 0.817819008 | 59.9 |
| 2.24444E-09 | 0.091031659 | 76 | -1.05031108  | 0.173292801 | 2           | 0           | 98   |
| 2.26867E-09 | 0.036237396 | 77 | -1.125284295 | 0.179306906 | 2.188034188 | 0.434138543 | 88.3 |
| 2.28172E-09 | 0.000889691 | 86 | -0.455335318 | 0.695653761 | 4.59558011  | 2.068511906 | 9.5  |
| 2.28676E-09 | 0.024502224 | 54 | -1.093834287 | 0.191635516 | 2.288770053 | 0.510146601 | 81.3 |
| 2.32057E-09 | 0.042698751 | 70 | -1.107658027 | 0.188258218 | 2.240963855 | 0.508233705 | 91.7 |
| 2.33343E-09 | 0.121074273 | 38 | -1.072394146 | 0.122076717 | 2           | 0           | 99.4 |
| 2.41399E-09 | 0.131678674 | 52 | -1.096961473 | 0.208428635 | 2.222222222 | 0.666666667 | 99.1 |
| 2.47316E-09 | 0.155659682 | 68 | -1.054773253 | 0.162575919 | 2           | 0           | 99.6 |
| 2.50081E-09 | 0.183060031 | 59 | -0.818197687 | 0.054008489 | 2           | 0           | 99.8 |
| 2.50143E-09 | 0.009252218 | 23 | -1.048437569 | 0.332457069 | 2.979202773 | 1.191514    | 42.3 |
| 2.51626E-09 | 0.123918922 | 39 | -1.066741817 | 0.20780973  | 2           | 0           | 98.9 |
| 2.56349E-09 | 0.1252226   | 15 | -0.998694593 | 0.102331873 | 2           | 0           | 99.8 |
| 2.62040E-09 | 0.097424746 | 78 | -1.029598257 | 0.254620082 | 2.071428571 | 0.267261242 | 98.6 |
| 2.64796E-09 | 0.068651967 | 8  | -1.092471575 | 0.217355616 | 2.242424242 | 0.501890366 | 96.7 |
| 2.68883E-09 | 0.112673204 | 79 | -1.053768259 | 0.138673972 | 2           | 0           | 98.4 |
| 2.77947E-09 | 0.185757721 | 46 | -0.929551012 | 0.413875575 | 2           | 0           | 99.8 |
| 2.78982E-09 | 0.04531321  | 50 | -1.145354862 | 0.170725115 | 2.295238095 | 0.553377905 | 89.5 |
| 2.79885E-09 | 0.143077961 | 73 | -1.096033883 | 0.146023087 | 2.125       | 0.353553391 | 99.2 |
| 2.81030E-09 | 0.155736687 | 20 | -0.726140245 | 0.432820529 | 2           | 0           | 99.7 |
| 2.87415E-09 | 0.184450928 | 36 | -1.146227699 | 0.107259298 | 2           | 0           | 99.6 |
| 2.93223E-09 | 0.175651662 | 32 | -0.886805271 | 0.206043994 | 2           | 0           | 99.4 |
| 2.93377E-09 | 0.138910089 | 67 | -1.050273973 | 0.186310394 | 2           | 0           | 98.7 |
| 2.94838E-09 | 0.054018292 | 97 | -1.083275792 | 0.216980851 | 2.129411765 | 0.371234597 | 91.5 |
| 2.95326E-09 | 0.029782522 | 83 | -1.120805092 | 0.199546373 | 2.331730769 | 0.667067187 | 79.2 |
| 3.05530E-09 | 0.063345484 | 66 | -1.10044798  | 0.175957857 | 2.192307692 | 0.486623482 | 94.8 |
| 3.09290E-09 | 0.142877693 | 81 | -0.986419954 | 0.143515861 | 2.25        | 0.46291005  | 99.2 |
| 3.10830E-09 | 0.199706781 | 99 | -0.925263038 | 0.070826145 | 2           | 0           | 99.7 |
| 3.12244E-09 | 0.157430658 | 66 | -0.892969234 | 0.260908084 | 2           | 0           | 99.6 |
| 3.23711E-09 | 0.118960926 | 96 | -1.013065316 | 0.177162792 | 2.125       | 0.341565026 | 98.4 |
| 3.29130E-09 | 0.153624259 | 12 | -0.962514812 | 0.276923124 | 2           | 0           | 99.6 |
| 3.31882E-09 | 0.057128617 | 4  | -1.12450918  | 0.168827861 | 2.2         | 0.496798259 | 90.5 |
| 3.33679E-09 | 0.134054739 | 16 | -0.96682715  | 0.225471047 | 2           | 0           | 98.9 |
| 3.36112E-09 | 0.090815239 | 85 | -1.112066721 | 0.170547596 | 2.205882353 | 0.41042563  | 96.6 |
| 3.40874E-09 | 0.142667866 | 29 | -0.926319127 | 0.238011007 | 2.076923077 | 0.277350098 | 98.7 |
| 3.45303E-09 | 0.116100218 | 51 | -1.044646007 | 0.186339041 | 2           | 0           | 97.4 |
| 3.45651E-09 | 0.07060834  | 37 | -1.071380657 | 0.19324928  | 2.125       | 0.333711906 | 94.4 |
| 3.47480E-09 | 0.036088665 | 87 | -1.151943963 | 0.171793791 | 2.294642857 | 0.578204936 | 77.6 |
| 3.48376E-09 | 0.180788421 | 35 | -1.145825701 | 0.108016977 | 2           | 0           | 99.8 |
| 3.54029E-09 | 0.195300871 | 50 | -0.848921787 | 0.419352563 | 2           | 0           | 99.3 |
| 3.54969E-09 | 0.190918855 | 20 | -1.150676802 | 0.16203972  | 2.222222222 | 0.440958552 | 99.1 |

|             |             |    |              |             |             |             |      |
|-------------|-------------|----|--------------|-------------|-------------|-------------|------|
| 3.56340E-09 | 0.153815397 | 57 | -0.963341718 | 0.266145164 | 2.181818182 | 0.603022689 | 98.9 |
| 3.60466E-09 | 0.010148286 | 50 | -1.111490862 | 0.320856386 | 3.451923077 | 1.463126473 | 27.2 |
| 3.64423E-09 | 0.093226633 | 90 | -1.114331816 | 0.157515526 | 2.060606061 | 0.242305842 | 96.7 |
| 3.68285E-09 | 0.185766621 | 26 | -0.964049503 | 0.220011664 | 2.125       | 0.353553391 | 99.2 |
| 3.71587E-09 | 0.124887435 | 96 | -0.963318807 | 0.391565437 | 2           | 0           | 98.9 |
| 3.74444E-09 | 0.040985564 | 29 | -1.134469376 | 0.17586001  | 2.317204301 | 0.580237352 | 81.4 |
| 3.83984E-09 | 0.156058522 | 28 | -0.941662284 | 0.352897614 | 2.111111111 | 0.333333333 | 99.1 |
| 3.85759E-09 | 0.106453984 | 65 | -1.059422386 | 0.216225713 | 2.041666667 | 0.204124145 | 97.6 |
| 3.86232E-09 | 0.140252604 | 45 | -1.019159908 | 0.226379193 | 2.090909091 | 0.301511345 | 98.9 |
| 3.87286E-09 | 0.145502936 | 1  | -0.999364589 | 0.29886187  | 2           | 0           | 98.2 |
| 3.88632E-09 | 0.032416763 | 76 | -1.150731117 | 0.189422701 | 2.440860215 | 0.741314683 | 72.1 |
| 3.88713E-09 | 0.047017897 | 20 | -1.14801296  | 0.197657482 | 2.372262774 | 0.594178861 | 86.3 |
| 3.90645E-09 | 0.045846424 | 6  | -1.159640492 | 0.173333038 | 2.386503067 | 0.641421583 | 83.7 |
| 3.98044E-09 | 0.117140945 | 68 | -1.019665069 | 0.26025968  | 2.111111111 | 0.323380833 | 98.2 |
| 4.03000E-09 | 0.110095979 | 10 | -1.09189299  | 0.20424468  | 2.161290323 | 0.373878251 | 96.9 |
| 4.04572E-09 | 0.078672153 | 59 | -1.067736191 | 0.187764467 | 2.080645161 | 0.274512211 | 93.8 |
| 4.12910E-09 | 0.054761298 | 85 | -1.129025389 | 0.19543459  | 2.278195489 | 0.56880235  | 86.7 |
| 4.14914E-09 | 0.066314677 | 56 | -1.129088865 | 0.163070482 | 2.23        | 0.489382212 | 90   |
| 4.17794E-09 | 0.0164626   | 75 | -1.164697329 | 0.256826852 | 3.111111111 | 1.251665557 | 37.9 |
| 4.20651E-09 | 0.087631791 | 90 | -1.060111267 | 0.19636677  | 2.140625    | 0.393082547 | 93.6 |
| 4.21081E-09 | 0.064123585 | 21 | -1.091860631 | 0.184766771 | 2.18        | 0.435310176 | 90   |
| 4.21166E-09 | 0.137810585 | 11 | -0.949375807 | 0.27348087  | 2.055555556 | 0.23570226  | 98.2 |
| 4.21670E-09 | 0.081031449 | 55 | -1.103999122 | 0.221934433 | 2.171428571 | 0.416034717 | 93   |
| 4.22175E-09 | 0.000272418 | 2  | -0.690351899 | 0.574334798 | 7.517694641 | 2.974408447 | 1.1  |
| 4.23302E-09 | 0.125799242 | 99 | -1.079104351 | 0.110959711 | 2.19047619  | 0.402373908 | 97.9 |
| 4.24265E-09 | 0.15514505  | 25 | -1.015750775 | 0.249887857 | 2           | 0           | 98.6 |
| 4.24356E-09 | 0.100546756 | 69 | -1.077996209 | 0.173001571 | 2.171428571 | 0.452815654 | 96.5 |
| 4.29833E-09 | 0.024542987 | 87 | -1.183254931 | 0.235510568 | 2.779017857 | 1.01346943  | 55.2 |
| 4.30986E-09 | 0.098298211 | 67 | -1.06413227  | 0.14941474  | 2.054054054 | 0.229243435 | 96.3 |
| 4.34849E-09 | 0.183250244 | 33 | -0.924007656 | 0.360950387 | 2.4         | 0.547722558 | 99.5 |
| 4.39763E-09 | 0.185077495 | 72 | -0.816890897 | 0.325853019 | 2.083333333 | 0.288675135 | 98.8 |
| 4.44240E-09 | 0.08427651  | 70 | -1.10003641  | 0.187711485 | 2.203703704 | 0.450560642 | 94.6 |
| 4.44845E-09 | 0.017813951 | 9  | -1.17632356  | 0.257289987 | 3.014950166 | 1.182840041 | 39.8 |
| 4.45830E-09 | 0.175059041 | 23 | -0.939003085 | 0.225445017 | 2.083333333 | 0.288675135 | 98.8 |
| 4.46223E-09 | 0.01012841  | 35 | -1.174938511 | 0.320436358 | 3.901112485 | 1.695979885 | 19.1 |
| 4.61902E-09 | 0.15531995  | 15 | -0.967296223 | 0.250404309 | 2.066666667 | 0.25819889  | 98.5 |
| 4.62164E-09 | 0.147314766 | 97 | -0.963441291 | 0.298049124 | 2.066666667 | 0.25819889  | 98.5 |
| 4.65305E-09 | 0.025544625 | 33 | -1.158958286 | 0.224263791 | 2.72611465  | 1.001773735 | 52.9 |
| 4.65635E-09 | 0.125795606 | 82 | -1.074312293 | 0.212691774 | 2.129032258 | 0.340777101 | 96.9 |
| 4.71245E-09 | 0.07716111  | 82 | -1.119875884 | 0.19582935  | 2.255813953 | 0.535472227 | 91.4 |
| 4.76454E-09 | 0.18308596  | 26 | -0.912781971 | 0.368044164 | 2           | 0           | 98.6 |
| 4.79342E-09 | 0.189459864 | 1  | -0.910850145 | 0.353987572 | 2.125       | 0.353553391 | 99.2 |
| 4.81383E-09 | 0.045104414 | 9  | -1.156951291 | 0.167607259 | 2.376470588 | 0.669524521 | 74.5 |
| 4.82194E-09 | 0.002499506 | 61 | -0.874957485 | 0.551042377 | 7.516683519 | 3.228945304 | 1.1  |
| 4.91357E-09 | 0.014005405 | 56 | -1.199227029 | 0.3053136   | 3.652116402 | 1.645184268 | 24.4 |
| 4.93431E-09 | 0.005905324 | 98 | -1.17323854  | 0.390895777 | 5.510615711 | 2.454126162 | 5.8  |
| 4.93693E-09 | 0.196083065 | 97 | -0.990675341 | 0.312793344 | 2.125       | 0.353553391 | 99.2 |
| 4.99813E-09 | 0.041186126 | 2  | -1.148684672 | 0.213508447 | 2.413669065 | 0.763395553 | 72.2 |
| 5.07083E-09 | 0.07201194  | 9  | -1.101236057 | 0.252893583 | 2.237623762 | 0.427750274 | 89.9 |
| 5.11498E-09 | 0.125991801 | 68 | -1.09249882  | 0.186480789 | 2.117647059 | 0.409338408 | 96.6 |
| 5.11716E-09 | 0.148427856 | 76 | -0.940659832 | 0.231109065 | 2.076923077 | 0.277350098 | 98.7 |
| 5.17769E-09 | 0.012524331 | 45 | -1.203154545 | 0.30092923  | 3.784747847 | 1.752314048 | 18.7 |

|             |             |    |              |             |             |             |      |
|-------------|-------------|----|--------------|-------------|-------------|-------------|------|
| 5.23359E-09 | 0.092135821 | 18 | -1.072870612 | 0.194604565 | 2.16        | 0.369074811 | 92.5 |
| 5.29038E-09 | 0.102290526 | 95 | -1.040962984 | 0.198739937 | 2.102040816 | 0.367701076 | 95.1 |
| 5.31548E-09 | 0.07914786  | 25 | -1.108323179 | 0.2058043   | 2.232876712 | 0.540589903 | 92.7 |
| 5.33621E-09 | 0.090563766 | 34 | -1.093543323 | 0.18512012  | 2.171052632 | 0.412735844 | 92.4 |
| 5.38098E-09 | 0.157451848 | 38 | -0.98324002  | 0.202145936 | 2           | 0           | 99.1 |
| 5.40690E-09 | 0.1850562   | 14 | -0.800911792 | 0.303986453 | 2           | 0           | 99.1 |
| 5.47559E-09 | 0.011867331 | 90 | -1.251686516 | 0.290839207 | 4.154121864 | 1.934055869 | 16.3 |
| 5.48605E-09 | 0.015551803 | 51 | -1.228041601 | 0.272263023 | 3.557463672 | 1.546779523 | 24.3 |
| 5.50414E-09 | 0.060750666 | 64 | -1.167958256 | 0.172239781 | 2.366459627 | 0.68638037  | 83.9 |
| 5.61863E-09 | 0.035996163 | 63 | -1.183029093 | 0.210397859 | 2.610497238 | 0.899492178 | 63.8 |
| 5.68850E-09 | 0.121377724 | 88 | -1.014565598 | 0.29560012  | 2.261904762 | 0.543678699 | 95.8 |
| 5.70741E-09 | 0.083854371 | 65 | -1.100602574 | 0.195691176 | 2.157894737 | 0.394531488 | 90.5 |
| 5.75030E-09 | 0.01947594  | 38 | -1.240834241 | 0.254003225 | 3.417266187 | 1.466726445 | 30.5 |
| 5.76505E-09 | 0.152226504 | 39 | -0.977476766 | 0.280358507 | 2.047619048 | 0.21821789  | 97.9 |
| 5.89865E-09 | 0.163066009 | 82 | -1.011577341 | 0.266066545 | 2.166666667 | 0.514495755 | 98.2 |
| 5.94085E-09 | 0.130459109 | 32 | -0.999523754 | 0.26285265  | 2.171428571 | 0.452815654 | 96.5 |
| 5.94539E-09 | 0.18194444  | 78 | -0.880514104 | 0.56194322  | 2.066666667 | 0.25819889  | 98.5 |
| 5.99600E-09 | 0.087536784 | 85 | -1.100714669 | 0.196550605 | 2.173469388 | 0.431384972 | 90.2 |
| 6.01210E-09 | 0.021766128 | 64 | -1.224374271 | 0.253383362 | 3.251515152 | 1.332589345 | 34   |
| 6.07143E-09 | 0.154425005 | 98 | -0.976111559 | 0.219431464 | 2.088235294 | 0.287902241 | 96.6 |
| 6.08898E-09 | 0.054544437 | 75 | -1.156228232 | 0.188529885 | 2.422413793 | 0.740315389 | 76.8 |
| 6.10043E-09 | 0.081826466 | 73 | -1.11798194  | 0.235621054 | 2.344537815 | 0.602775709 | 88.1 |
| 6.10749E-09 | 0.116399301 | 41 | -1.003188619 | 0.263561488 | 2.173076923 | 0.382004714 | 94.8 |
| 6.14038E-09 | 0.13420271  | 4  | -0.989565139 | 0.268687092 | 2.088235294 | 0.287902241 | 96.6 |
| 6.17449E-09 | 0.03962968  | 86 | -1.187697909 | 0.226122085 | 2.619302949 | 0.915724372 | 62.7 |
| 6.18262E-09 | 0.161237583 | 10 | -1.012258715 | 0.274510162 | 2.090909091 | 0.294244943 | 97.8 |
| 6.18684E-09 | 0.012842356 | 44 | -1.24529691  | 0.293635728 | 4.223760092 | 1.894623041 | 13.3 |
| 6.19671E-09 | 0.128649514 | 16 | -1.104318441 | 0.162947602 | 2.146341463 | 0.357839043 | 95.9 |
| 6.20313E-09 | 0.072950294 | 19 | -1.109074107 | 0.205247864 | 2.210144928 | 0.504764143 | 86.2 |
| 6.32830E-09 | 0.064723744 | 36 | -1.156063106 | 0.191197798 | 2.411428571 | 0.77451187  | 82.5 |
| 6.34873E-09 | 0.099776515 | 91 | -1.092183265 | 0.180593092 | 2.138297872 | 0.376773622 | 90.6 |
| 6.34945E-09 | 0.165175497 | 93 | -0.854390466 | 0.33572465  | 2.096774194 | 0.300537154 | 96.9 |
| 6.38891E-09 | 0.110258902 | 97 | -1.085744336 | 0.202904705 | 2.15        | 0.40442468  | 94   |
| 6.40015E-09 | 0.050953377 | 14 | -1.172790902 | 0.196916738 | 2.536977492 | 0.79782923  | 68.9 |
| 6.41778E-09 | 0.190737532 | 89 | -0.842880338 | 0.295660345 | 2           | 0           | 99   |
| 6.47170E-09 | 0.060775701 | 82 | -1.163662857 | 0.178143702 | 2.450980392 | 0.757588226 | 79.6 |
| 6.51853E-09 | 0.004617782 | 71 | -1.210709198 | 0.399831    | 7.283076923 | 3.056932534 | 2.5  |
| 6.60017E-09 | 0.025945115 | 24 | -1.23999063  | 0.238003999 | 3.253968254 | 1.357640499 | 37   |
| 6.61228E-09 | 0.155039291 | 80 | -1.077182833 | 0.198121309 | 2.192307692 | 0.491465626 | 97.4 |
| 6.65150E-09 | 0.089377494 | 70 | -1.122540443 | 0.212761949 | 2.292035398 | 0.677197691 | 88.7 |
| 6.74522E-09 | 0.028716439 | 30 | -1.229410947 | 0.225405153 | 3.053872054 | 1.223901989 | 40.6 |
| 6.75761E-09 | 0.181987218 | 95 | -0.90080269  | 0.283784028 | 2.041666667 | 0.204124145 | 97.6 |
| 6.80299E-09 | 0.035593864 | 53 | -1.218523541 | 0.218827111 | 2.816283925 | 1.026666403 | 52.1 |
| 6.80899E-09 | 0.139976064 | 10 | -0.92724971  | 0.31538391  | 2.051282051 | 0.223455865 | 96.1 |
| 6.82377E-09 | 0.026322939 | 33 | -1.227555743 | 0.254452956 | 3.223088924 | 1.422529813 | 35.9 |
| 6.83526E-09 | 0.02185311  | 46 | -1.255990055 | 0.26123279  | 3.510608204 | 1.556613615 | 29.3 |
| 6.88001E-09 | 0.139843747 | 58 | -1.0093959   | 0.250296208 | 2.074074074 | 0.264350529 | 94.6 |
| 6.99125E-09 | 0.112092321 | 9  | -1.05410803  | 0.242560421 | 2.22972973  | 0.454725487 | 92.6 |
| 7.00522E-09 | 0.066422391 | 31 | -1.159830873 | 0.184458943 | 2.422535211 | 0.636810415 | 78.7 |
| 7.06315E-09 | 0.185137758 | 25 | -1.033897579 | 0.244493514 | 2.076923077 | 0.277350098 | 98.7 |
| 7.07613E-09 | 0.041351063 | 42 | -1.205124201 | 0.206045411 | 2.772839506 | 1.072958843 | 59.5 |
| 7.10128E-09 | 0.111405219 | 82 | -1.088357797 | 0.225200353 | 2.222222222 | 0.451046427 | 92.8 |



|             |             |    |              |             |             |             |      |
|-------------|-------------|----|--------------|-------------|-------------|-------------|------|
| 7.11413E-09 | 0.047240915 | 57 | -1.186310723 | 0.200375135 | 2.617283951 | 0.911813098 | 67.6 |
| 7.12264E-09 | 0.095681196 | 32 | -1.087930411 | 0.213895125 | 2.196261682 | 0.422017891 | 89.3 |
| 7.12753E-09 | 0.153702421 | 87 | -0.962651569 | 0.229813026 | 2.136363636 | 0.347141757 | 95.6 |
| 7.18259E-09 | 0.150989175 | 87 | -0.9925314   | 0.162399352 | 2.151515152 | 0.364109541 | 96.7 |
| 7.18950E-09 | 0.186493724 | 90 | -0.768900939 | 0.446322541 | 2.083333333 | 0.282329851 | 97.6 |
| 7.21488E-09 | 0.137496908 | 79 | -1.047597322 | 0.233747406 | 2.156862745 | 0.418212818 | 94.9 |
| 7.27193E-09 | 0.001572966 | 77 | -1.021215784 | 0.525489134 | 10.99098196 | 3.964602509 | 0.2  |
| 7.29832E-09 | 0.111544153 | 12 | -1.04188503  | 0.224923369 | 2.171052632 | 0.379057002 | 92.4 |
| 7.37434E-09 | 0.070972038 | 70 | -1.14641744  | 0.196644062 | 2.435       | 0.684189724 | 80   |
| 7.37955E-09 | 0.179894272 | 10 | -0.921630198 | 0.373420624 | 2.235294118 | 0.562295715 | 98.3 |
| 7.38228E-09 | 0.077346003 | 69 | -1.105137745 | 0.209015308 | 2.307228916 | 0.609676145 | 83.4 |
| 7.38499E-09 | 0.074404424 | 67 | -1.147772967 | 0.214536781 | 2.45508982  | 0.691659318 | 83.3 |
| 7.41888E-09 | 0.184586897 | 15 | -0.988874022 | 0.225523178 | 2.136363636 | 0.351250087 | 97.8 |
| 7.50953E-09 | 0.138095976 | 66 | -1.034205717 | 0.212900905 | 2.127659574 | 0.396562473 | 95.3 |
| 7.51481E-09 | 0.026418274 | 99 | -1.250339013 | 0.251084937 | 3.350591716 | 1.45648474  | 32.4 |
| 7.54150E-09 | 0.077198812 | 13 | -1.157593427 | 0.195277681 | 2.46961326  | 0.792614776 | 81.9 |
| 7.65087E-09 | 0.084947366 | 47 | -1.108905764 | 0.203433845 | 2.298136646 | 0.510449808 | 83.9 |
| 7.65331E-09 | 0.032642781 | 18 | -1.222145963 | 0.254437133 | 2.985790409 | 1.193015202 | 43.7 |
| 7.65991E-09 | 0.025832006 | 8  | -1.265216993 | 0.25145758  | 3.418639053 | 1.568450591 | 32.4 |
| 7.68335E-09 | 0.010311484 | 72 | -1.333162675 | 0.312556897 | 5.847207587 | 2.559182421 | 5.1  |
| 7.68816E-09 | 0.079914311 | 30 | -1.137983494 | 0.206514737 | 2.38547486  | 0.637772786 | 82.1 |
| 7.69386E-09 | 0.188674737 | 90 | -0.989011695 | 0.209983328 | 2           | 0           | 97.7 |
| 7.72114E-09 | 0.162586604 | 75 | -0.943133758 | 0.288029914 | 2.081081081 | 0.276724731 | 96.3 |
| 7.75176E-09 | 0.005815423 | 47 | -1.312571945 | 0.350846263 | 7.816347124 | 3.34008032  | 0.9  |
| 7.80529E-09 | 0.088368467 | 44 | -1.12396216  | 0.194575843 | 2.265151515 | 0.550639441 | 86.8 |
| 7.87197E-09 | 0.10894672  | 7  | -1.063174882 | 0.212754079 | 2.23364486  | 0.506177671 | 89.3 |
| 7.92871E-09 | 0.19843264  | 50 | -0.990612648 | 0.317037141 | 2.166666667 | 0.380693494 | 97.6 |
| 7.99685E-09 | 0.008369269 | 81 | -1.337046159 | 0.338252918 | 6.961934156 | 2.994604067 | 2.8  |
| 8.01327E-09 | 0.193585215 | 25 | -0.900948362 | 0.385229867 | 2.210526316 | 0.418853908 | 98.1 |
| 8.06551E-09 | 0.108890271 | 65 | -1.081055455 | 0.198478403 | 2.165137615 | 0.441247421 | 89.1 |
| 8.14365E-09 | 0.130617238 | 76 | -1.017318034 | 0.252265869 | 2.140350877 | 0.350438322 | 94.3 |
| 8.17114E-09 | 0.075258332 | 23 | -1.138779245 | 0.222082313 | 2.43255814  | 0.732337485 | 78.5 |
| 8.18483E-09 | 0.050371983 | 67 | -1.201021438 | 0.205017868 | 2.640826873 | 0.88901607  | 61.3 |
| 8.24470E-09 | 0.024547216 | 74 | -1.277545786 | 0.253740075 | 3.575635877 | 1.636741586 | 25.3 |
| 8.26690E-09 | 0.092183487 | 54 | -1.143499769 | 0.161789778 | 2.32885906  | 0.608975136 | 85.1 |
| 8.30507E-09 | 0.081704416 | 64 | -1.116203165 | 0.246528133 | 2.424418605 | 0.802107756 | 82.8 |
| 8.31030E-09 | 0.193022601 | 49 | -0.8959442   | 0.297043347 | 2.038461538 | 0.196116135 | 97.4 |
| 8.35460E-09 | 0.188420479 | 37 | -0.843520223 | 0.400404285 | 2.071428571 | 0.262265264 | 97.2 |
| 8.40694E-09 | 0.183921943 | 52 | -0.976813403 | 0.263261996 | 2.071428571 | 0.262265264 | 97.2 |
| 8.42181E-09 | 0.172085151 | 75 | -0.971984654 | 0.284262444 | 2.137931034 | 0.350931203 | 97.1 |
| 8.43248E-09 | 0.17370966  | 50 | -0.973581436 | 0.266502793 | 2.142857143 | 0.355035801 | 96.5 |
| 8.43370E-09 | 0.196662612 | 54 | -0.91649985  | 0.250177244 | 2.096774194 | 0.300537154 | 96.9 |
| 8.44681E-09 | 0.068571065 | 25 | -1.139934404 | 0.197227753 | 2.4921875   | 0.821248153 | 74.4 |
| 8.44749E-09 | 0.189700816 | 93 | -0.998830845 | 0.260769879 | 2.064516129 | 0.249731038 | 96.9 |
| 8.46323E-09 | 0.125887308 | 44 | -1.055804236 | 0.231956951 | 2.160714286 | 0.416774878 | 94.4 |
| 8.47772E-09 | 0.073450666 | 80 | -1.142667633 | 0.210646128 | 2.400921659 | 0.720467363 | 78.3 |
| 8.51053E-09 | 0.050994876 | 17 | -1.191753039 | 0.19497868  | 2.613445378 | 0.828996046 | 64.3 |
| 8.54517E-09 | 0.184751248 | 45 | -0.893953272 | 0.380687338 | 2.130434783 | 0.344350222 | 97.7 |
| 8.60084E-09 | 0.151474097 | 82 | -1.036170237 | 0.231960913 | 2.16        | 0.37032804  | 95   |
| 8.60949E-09 | 0.10508107  | 73 | -1.092185479 | 0.227515237 | 2.290909091 | 0.564149999 | 89   |
| 8.63334E-09 | 0.16381068  | 48 | -0.909971561 | 0.325595286 | 2.022222222 | 0.149071198 | 95.5 |
| 8.64179E-09 | 0.057600032 | 10 | -1.195425726 | 0.209854215 | 2.636094675 | 0.892167775 | 66.2 |

|             |             |    |                                                              |             |             |             |      |  |
|-------------|-------------|----|--------------------------------------------------------------|-------------|-------------|-------------|------|--|
| 8.74248E-09 | 0.00904102  | 46 | -1.355739991                                                 | 0.337972087 | 6.850868233 | 2.959202271 | 2.1  |  |
| 8.78851E-09 | 0.000620664 | 3  | -0.95636245                                                  | 0.479553828 | 13.70870871 | 4.389849176 | 0.1  |  |
| 8.88195E-09 | 0.028848465 | 34 | -1.28635734                                                  | 0.239059698 | 3.493562232 | 1.505824903 | 30.1 |  |
| 8.88317E-09 | 0.037878753 | 24 | -1.256832911                                                 | 0.224262038 | 3.073883162 | 1.254131228 | 41.8 |  |
| 8.90884E-09 | 0.118572492 | 80 | -1.049948124                                                 | 0.257985408 | 2.279069767 | 0.662458217 | 91.4 |  |
| 8.92040E-09 | 0.142807314 | 43 | -1.009835488                                                 | 0.27524197  | 2.298245614 | 0.596564937 | 94.3 |  |
| 8.92560E-09 | 0.109100561 | 5  | -1.0777045                                                   | 0.201814829 | 2.238095238 | 0.480475955 | 87.4 |  |
| 8.98107E-09 | 0.032088454 | 35 | -1.270939853                                                 | 0.24195228  | 3.34769688  | 1.370739574 | 32.7 |  |
| 8.98286E-09 | 0.121676149 | 71 | -0.990236976                                                 | 0.278631082 | 2.157894737 | 0.394531488 | 90.5 |  |
| 8.99266E-09 | 0.064758017 | 15 | -1.167522903                                                 | 0.199654594 | 2.503355705 | 0.783879338 | 70.2 |  |
| 2.86874E-09 | 0.166334062 | 51 | NA                                                           | NA          | NA          | NA          | 100  |  |
| 4.70737E-09 | 0.108242335 | 51 | NA                                                           | NA          | NA          | NA          | 100  |  |
| 8.12744E-09 | 0.093878481 | 55 | NA                                                           | NA          | NA          | NA          | 100  |  |
| 2.26321E-09 | 0.054840814 | 87 | NA                                                           | NA          | NA          | NA          | 100  |  |
| 2.35190E-09 | 0.164402304 | 46 | NA                                                           | NA          | NA          | NA          | 100  |  |
| 1.27626E-09 | 0.171937101 | 95 | NA                                                           | NA          | NA          | NA          | 100  |  |
| 3.19730E-09 | 0.158838896 | 31 | NA                                                           | NA          | NA          | NA          | 100  |  |
| 3.31992E-09 | 0.072217592 | 43 | NA                                                           | NA          | NA          | NA          | 100  |  |
| 7.12420E-09 | 0.045272388 | 13 | NA                                                           | NA          | NA          | NA          | 100  |  |
| 8.33616E-09 | 0.109313414 | 88 | NA                                                           | NA          | NA          | NA          | 100  |  |
| 2.45418E-09 | 0.18871725  | 51 | NA                                                           | NA          | NA          | NA          | 100  |  |
|             |             |    |                                                              |             |             |             |      |  |
|             |             |    | *NA = Could not be estimated, all replicates were invariable |             |             |             |      |  |
|             |             |    |                                                              |             |             |             |      |  |

657  
658  
659
